# Supplementary material for: Chemoselective C(sp)–H borylation of terminal alkynes catalyzed by a bis(N-heterocyclicsilylene) manganese complex
Source: Royal Society of Chemistry journal article supplement (doi:10.1039/d3qi01033c), 2023-01-01
Supplement: d3qi01033c1.pdf [file d3qi01033c1.pdf]

*Electronic Supplementary Information*

**Chemoselective C(sp)-H Borylation of Terminal Alkynes Catalyzed by  
a Bis(N-heterocyclicsilylene) Manganese Complex**

*Himani Ahuja,<sup>‡</sup> Harleen Kaur<sup>‡</sup> and Rebeca Arevalo<sup>\*</sup>*

*Department of Chemistry and Biochemistry  
University of California, Merced, 95343, USA*

[rebecaarevalo@ucmerced.edu](mailto:rebecaarevalo@ucmerced.edu)

<sup>‡</sup> *These authors contributed equally.*

**Table of Contents**

|                                                                                        |      |
|----------------------------------------------------------------------------------------|------|
| 1. General Considerations                                                              | S2   |
| 2. General Catalytic Procedures                                                        | S4   |
| 3. Optimization of the Catalytic Conditions                                            | S5   |
| 4. Control Experiments                                                                 | S8   |
| 5. Characterization of Alkynylboronate Esters                                          | S10  |
| 6. Preparation of 4-fluorophenylacetylene- <i>d</i>                                    | S17  |
| 7. NMR Monitoring of Catalytic and Stoichiometric Reactions                            | S18  |
| 8. Stoichiometric Reactions of <b>Mn1</b>                                              | S37  |
| 9. KIE Determination                                                                   | S44  |
| 10. Reaction of <b>1</b> with HBPin employing different Mn active species as catalysts | S47  |
| 11. Spectroscopic Data                                                                 | S51  |
| 12. References                                                                         | S100 |

## 1. General Considerations

All air- and moisture-sensitive manipulations were carried out using vacuum line, Schlenk and cannula techniques or in an MBraun inert atmosphere (argon) glovebox unless otherwise noted. All glassware was stored in a pre-heated at 200 °C oven prior to use. All glassware was cleaned using base (KOH, iPrOH) and acid (HCl (aq)) baths. All reported reaction temperatures correspond to external silicone oil bath temperatures. Room temperature (rt) was approximately 23 °C.

The solvents used for air- and moisture-sensitive manipulations were dried and deoxygenated using literature procedures.<sup>1</sup>

MnCl<sub>2</sub> was purchased from Fisher Scientific (99.99%, ultra dry) and dried under high vacuum for 8 h prior to use. Mesitylene, and *N,N'*-Di-*tert*-butylcarbodiimide were dried over CaH<sub>2</sub> degassed by three freeze-pump-thaw cycles and distilled under vacuum prior to use. The terminal alkynes employed in the substrate scope (**1-20**) were purchased from commercial sources (Thermo Fisher Scientific, AmBeed and Sigma Aldrich), dried over lithium aluminum hydride and distilled prior to use. MeLi (1.6 M diethyl ether), NaHBEt<sub>3</sub> (1.0 M solution in THF), KO<sup>t</sup>Bu (1.0 M solution in THF), NH<sub>3</sub>BH<sub>3</sub> and dmpe were purchased from Sigma Aldrich and used as received. All other reagents were used as received. SiNSi,<sup>2</sup> 2,6-Diamine-*N,N'*-diethylpyridine,<sup>2,3</sup> [Mn(SiNSi)Cl<sub>2</sub>]<sup>4</sup> (**Mn1**), [Mn(SiNSi)Br<sub>2</sub>],<sup>5</sup> [Mn(SiNSi)(dmpe)],<sup>5</sup> [Mn(dmpe)<sub>2</sub>Br<sub>2</sub>],<sup>6</sup> [Mn(terpy)Cl<sub>2</sub>],<sup>7</sup> [Mn(<sup>i</sup>PrPNP)Cl<sub>2</sub>]<sup>8</sup> and HBDan (Dan = 1,8-diaminonaphthalene)<sup>9</sup> were prepared according to literature procedures. 2,6-Diamine-*N,N'*-diethylpyridine was distilled under vacuum prior to its use.

DCM-d<sub>2</sub>, CDCl<sub>3</sub> (Thermo Fisher Scientific) were distilled from CaH<sub>2</sub> under an atmosphere of argon prior to its use and stored over 4 Å molecular sieves. THF-d<sub>8</sub> and Toluene-d<sub>8</sub> (Thermo Fisher Scientific) were distilled from sodium metal under an atmosphere of argon and stored under argon. Benzene-d<sub>6</sub> and DMSO-d<sub>6</sub> were purchased from Thermo Fischer Scientific and used without further purification. D<sub>2</sub>O was purchased from Sigma-Aldrich and used without further purification.

<sup>1</sup>H NMR spectra were recorded on either Varian 400 or 500 spectrophotometers operating at 400 MHz, and 500 MHz, respectively. <sup>13</sup>C NMR spectra were recorded on Varian 400 or 500 spectrophotometers operating at 101 MHz and 126 MHz, respectively. <sup>11</sup>B NMR spectra were recorded on Varian 400 or 500 spectrometers with 128 MHz and 160 MHz frequencies. <sup>19</sup>F NMR spectra were recorded on Varian 400 or 500 spectrometers with 376 MHz and 470 MHz frequencies. All <sup>1</sup>H and <sup>13</sup>C NMR chemical shifts are reported in ppm relative to SiMe<sub>4</sub> using the <sup>1</sup>H (chloroform-*d*: 7.26 ppm; benzene-*d*<sub>6</sub>: 7.16 ppm) and <sup>13</sup>C (chloroform-*d*: 77.16 ppm;

benzene-*d*<sub>6</sub>: 128 ppm) chemical shifts of the solvent as a standard. <sup>1</sup>H NMR data for diamagnetic compounds are reported as follows: chemical shift, multiplicity (s = singlet, d = doublet, t = triplet, q = quartet, p = pentet, br = broad, m = multiplet, app = apparent, obsc = obscured), coupling constants (Hz), integration, assignment. <sup>13</sup>C NMR data for diamagnetic compounds are reported as follows: chemical shift, number of protons attached to carbon (e. g. CH<sub>2</sub>), assignment. QC stands for *quaternary carbon*.

GC analyses were performed using a Shimadzu GC-2014 gas chromatograph equipped with a Shimadzu AOC-20s autosampler and a Shimadzu capillary column (15m x 250μm). The instrument was set to a detector temperature of 250 °C. UHP-grade (99.999%) helium was used as carrier gas and further purified employing a He purifier installed prior to the instrument inlet. The temperature program used for GC analyses was as follows: 60 °C, isothermal 1 min; 15 °C/min to 250 °C, isothermal 2 min.

Infrared spectroscopy was conducted on a ALPHA II Compact FT-IR Spectrometer spectrometer installed in an argon glovebox.

## 2. General Catalytic Procedures

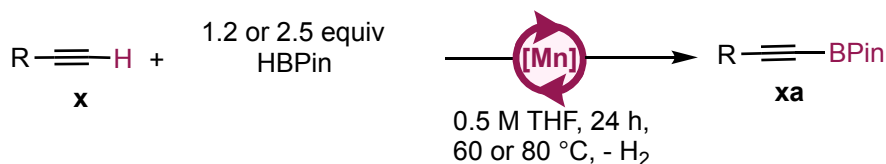

**Method 1: General Procedure for the C-H borylation of fluorinated aromatic terminal alkynes.** In an argon-filled glovebox a J. Young flask was charged with a magnetic stir bar and the reagents in the following order: **Mn1** (12 mg, 0.015 mmol), terminal alkyne (0.3 mmol), THF (0.5 mL) and HBPIn (110  $\mu$ L, 0.75 mmol for synthesis of alkynylboronate esters or 53  $\mu$ L, 0.36 mmol for catalyst screening and optimization of the reaction components). The reaction was stirred and heated to 60 °C (for catalyst screening and optimization of the reaction components) or 80 °C (for synthesis of alkynylboronate esters) for 24 h. After this time, the reaction was brought into the glovebox and fluorobenzene (10  $\mu$ L, 0.106 mmol) was added as an internal standard. The crude reaction mixture was passed through a plug of Whatman filter paper in a Pasteur pipette and then analyzed by GC chromatography and <sup>19</sup>F NMR spectroscopy without additional purification.

**Method 2: General Procedure for the C-H borylation of other terminal alkynes:** In an argon-filled glovebox a J. Young flask was charged with a magnetic stir bar and the reagents in the following order: **Mn1** (12.15 g, 0.015 mmol), terminal alkyne (0.3 mmol), THF (0.5 mL) and HBPIn (110  $\mu$ L, 0.75 mmol). The reaction was stirred and heated to 80 °C for 24 h, time after which it was exposed to air and mesitylene (10  $\mu$ L, 0.07 mmol) was added as an internal standard. The crude reaction mixture was passed through a plug of Whatman filter paper in a Pasteur pipette and then analyzed by GC chromatography and <sup>1</sup>H NMR spectroscopy without additional purification.

**General procedure for isolation of C-H borylated products:** After the completion of the reaction, it was exposed to air and volatiles were removed in vacuo. Then, it was brought into the glovebox and hexane was added. The reaction mixture was passed through a plug of Whatman filter paper in a Pasteur pipette and then kept in freezer to precipitate out the product as an amorphous solid. Hexane was decanted the next day and mesitylene was added as an internal standard and isolated product was analyzed by <sup>1</sup>H NMR spectroscopy.



### 3. Optimization of the Catalytic Conditions

**3.1 Optimization of the components of the reaction:** The optimization of the X-type ligand at the Mn precatalyst afforded the % conversion and % yield reported in Table S1. All the catalytic reactions were conducted following the general catalytic procedure described in Method 1 (60 °C) employing 4-fluorophenylacetylene (34  $\mu$ L, 0.3 mmol) as the alkyne, [Mn(SiNSi)Br<sub>2</sub>] (13 mg, 0.015 mmol) instead of **Mn1**, and HBCat (38  $\mu$ L, 0.36 mmol) or HBDan (60 mg, 0.36 mmol) instead of HBPIn.

| Entry | 'X' type ligand   | Borylating agent | Conversion (%) | Yield (%) |
|-------|-------------------|------------------|----------------|-----------|
| 1     | Cl ( <b>Mn1</b> ) | HBPIn            | 49             | 47        |
| 2     | Cl                | HBCat            | >99            | 0         |
| 3     | Cl                | HBDan            | 23             | 4         |
| 4     | Br                | HBPIn            | 88             | 43        |

**Table S1.** Optimization of the X-type ligand at Mn and borylating agent.

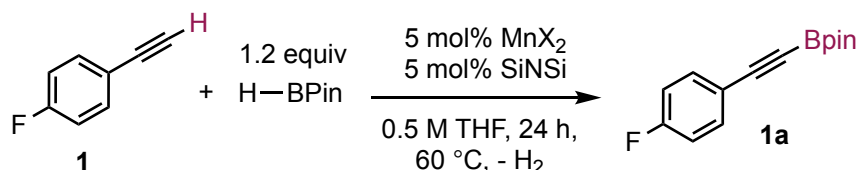

**3.2 Evaluation of the catalytic efficiency of *in-situ* formed Mn precatalysts:** The catalytic reactions were conducted following the general catalytic procedure Method 1 (1.2 equiv of HBPIn and 60 °C) described above employing 4-fluorophenylacetylene (34  $\mu$ L, 0.3 mmol) as the alkyne and a mixture of MnX<sub>2</sub> (for X = Cl, 2 mg, 0.015 mmol; for X = OAc, 3 mg, 0.015 mmol; for X = OTf, 5 mg, 0.015 mmol) and SiNSi (10 mg, 0.015 mmol) in THF (0.3 mL) freshly generated upon stirring the reagents at room temperature for 1 h.

| Entry | X    | Conversion (%) | Yield <b>1a</b> (%) |
|-------|------|----------------|---------------------|
| 1     | Cl   | 33             | 11                  |
| 2     | OAc* | 45             | <5%                 |
| 3     | OTf  | 66             | <5%                 |

\* <5% alkenylboronate ester was detected by <sup>19</sup>F NMR spectroscopy.

**Table S2.** Evaluation of the catalyst efficiency of *in-situ* formed precatalysts from different MnX<sub>2</sub> salts.

**3.3 Optimization of the reaction conditions:** The optimization of the reaction conditions afforded the % conversion and % yield reported in Table S2. All the catalytic reactions were conducted following the general Method 1 catalytic procedure described above employing 4-fluorophenylacetylene (34  $\mu$ L, 0.3 mmol) as the alkyne.

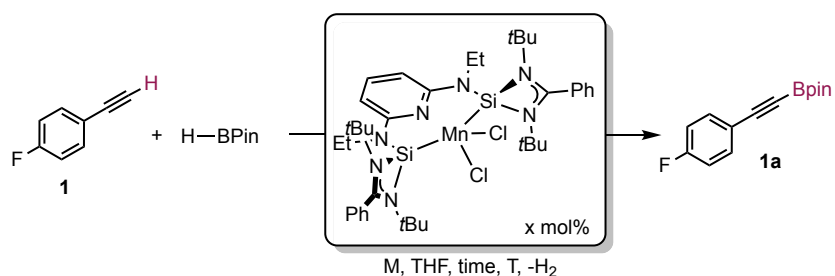

| Entry    | Molarity of solution | Catalyst loading (mol%) | Equiv of HBPIn | T (°C)    | Solvent    | t (h)     | Conversion (%) | Yield <b>1a</b> (%) |
|----------|----------------------|-------------------------|----------------|-----------|------------|-----------|----------------|---------------------|
| 1        | 0.5                  | 5                       | 0.8            | 80        | THF        | 24        | 49             | 45                  |
| 2        | 0.5                  | 5                       | 1.0            | 80        | THF        | 24        | 96             | 74                  |
| 3        | 0.5                  | 5                       | 1.2            | 80        | THF        | 24        | 83             | 67                  |
| 4        | 0.5                  | 5                       | 1.5            | 80        | THF        | 24        | 66             | 48                  |
| 5        | 0.5                  | 5                       | 2.0            | 80        | THF        | 24        | 98             | 88                  |
| <b>6</b> | <b>0.5</b>           | <b>5</b>                | <b>2.5</b>     | <b>80</b> | <b>THF</b> | <b>24</b> | <b>&gt;99</b>  | <b>&gt;99</b>       |
| 7        | 0.5                  | 5                       | 3.0            | 80        | THF        | 24        | 95             | 82                  |
| 8        | 0.5                  | 5                       | 1.2            | r.t.      | THF        | 24        | 52             | <5                  |
| 9        | 0.5                  | 5                       | 1.2            | r.t.*     | THF        | 24        | 35             | 5                   |
| 10       | 0.5                  | 5                       | 1.2            | 40        | THF        | 24        | 25             | 9                   |
| 11       | 0.5                  | 5                       | 1.2            | 60        | THF        | 24        | 49             | 47                  |
| 12       | 0.5                  | 5                       | 1.2            | 100       | THF        | 24        | >99            | 65                  |

| Entry           | Molarity<br>of<br>solution | Catalyst<br>loading<br>(mol%) | Equiv<br>of<br>HBPIn | T (°C) | Solvent                        | t (h) | Conversion<br>(%) | Yield 1a (%)       |
|-----------------|----------------------------|-------------------------------|----------------------|--------|--------------------------------|-------|-------------------|--------------------|
| 13              | 0.5                        | 5                             | 1.2                  | 80     | FC <sub>6</sub> H <sub>5</sub> | 24    | 74                | 44                 |
| 14 <sup>#</sup> | 0.5                        | 5                             | 1.2                  | 80     | C <sub>6</sub> H <sub>6</sub>  | 24    | 48                | 36<br>(10% alkene) |
| 15 <sup>#</sup> | 0.5                        | 5                             | 1.2                  | 80     | Toluene                        | 24    | 72                | 31<br>(7% alkene)  |
| 16 <sup>#</sup> | 0.5                        | 5                             | 1.2                  | 80     | Hexane                         | 24    | 35                | 22<br>(13% alkene) |
| 17              | 0.5                        | 5                             | 1.2                  | 80     | 2 Me-THF                       | 24    | 95                | 63                 |
| 18              | 0.5                        | 5                             | 1.2                  | 80     | THF                            | 16    | 85                | 43                 |
| 19              | 0.5                        | 5                             | 2.5                  | 80     | THF                            | 72    | >99               | 87                 |
| 20              | 0.25                       | 5                             | 1.2                  | 80     | THF                            | 24    | 41                | 27                 |
| 21              | 0.75                       | 5                             | 1.2                  | 80     | THF                            | 24    | 84                | 77                 |
| 22              | 1.00                       | 5                             | 1.2                  | 80     | THF                            | 24    | 92                | 84                 |
| 23              | 0.5                        | 3                             | 1.2                  | 80     | THF                            | 24    | 73                | 48                 |
| 24 <sup>#</sup> | 0.5                        | 3                             | 2.5                  | 80     | THF                            | 24    | 94                | 61<br>(9% alkene)  |
| 25 <sup>#</sup> | 0.5                        | 5                             | 2.5                  | 80     | neat                           | 24    | ND                | 62<br>(74% alkene) |

(\* = reaction was carried out in the presence of blue light)

ND : Not determined

(<sup>#</sup> = The corresponding alkenylboronate ester **1b** was formed as the side product in these reactions due to the accumulation of H<sub>2</sub> in the reaction medium. When the reaction in entry 14 was carried out in a J. Young NMR tube where the headspace was previously evacuated, the yield of alkenylboronate ester was <5%, supporting the chemoselectivity of the catalytic system in C<sub>6</sub>H<sub>6</sub>, see section 7.2)

**Table S3.** Optimization of catalytic conditions.

#### 4. Control Experiments

The control experiments were carried out following the general catalytic procedure under the optimized conditions.

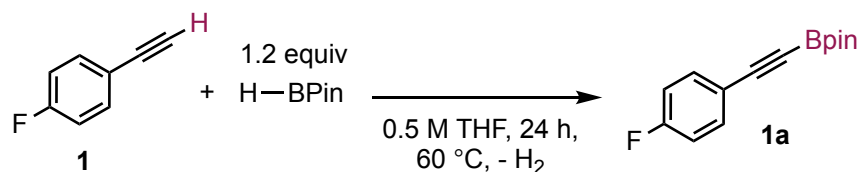

**4.1 Reaction of 4-fluorophenylacetylene with HBPIn.** In an argon-filled glovebox a J. Young flask was charged with a magnetic stir bar and 4-fluorophenylacetylene (34.5  $\mu$ L, 0.3 mmol), THF (0.52 mL) and HBPIn (52  $\mu$ L, 0.36 mmol) were added. The tube was sealed, and the resulting mixture was stirred at 60 °C for 24 hours. The reaction was brought into the glovebox and fluorobenzene (10  $\mu$ L, 0.106 mmol) was added as an internal standard. The crude reaction mixture was passed through a plug of Whatman filter paper in a Pasteur pipette and then analyzed by GC chromatography and <sup>19</sup>F NMR spectroscopy without additional purification. Conversion: <5%; Yield: <5%.

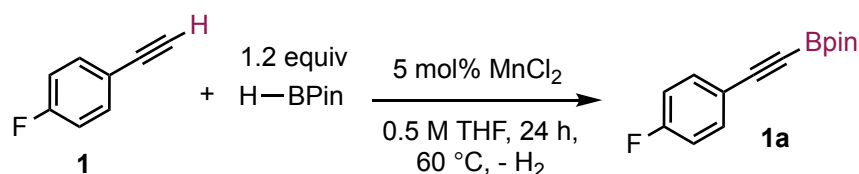

#### 4.2 Reaction of 4-fluorophenylacetylene with HBPIn in the presence of 5 mol% of MnCl<sub>2</sub>.

In an argon-filled glovebox a J. Young flask was charged with a magnetic stir bar, 4-fluorophenylacetylene (34.5  $\mu$ L, 0.3 mmol), THF (0.52 mL), HBPIn (52  $\mu$ L, 0.36 mmol) and MnCl<sub>2</sub> (1.89 mg, 0.015 mmol). The tube was sealed, and the resulting mixture was stirred at 60 °C for 24 hours. The reaction was brought into the glovebox and fluorobenzene (10  $\mu$ L, 0.106 mmol) was added as an internal standard. The crude reaction mixture was passed through a plug of whatman filter paper in a Pasteur pipette and then analyzed by GC chromatography and NMR spectroscopy without additional purification. Conversion: 17%; Yield: 17%.

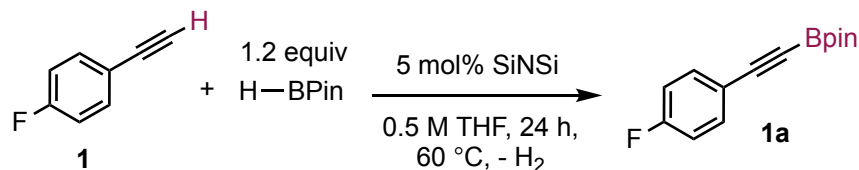

#### 4.3 Reaction of 4- fluorophenylacetylene with HBPIn in the presence of 5 mol% of SiNSi.

In an argon-filled glovebox a J. Young flask was charged with a magnetic stir bar, 4-

fluorophenylacetylene (35  $\mu$ L, 0.3 mmol), THF (0.52 mL), HBPIn (52  $\mu$ L, 0.36 mmol) and SiNSi (10 mg, 0.015 mmol). The tube was sealed, and the resulting mixture was stirred at 60  $^{\circ}$ C for 24 hours. The reaction was brought into the glovebox and fluorobenzene (10  $\mu$ L, 0.106 mmol) was added as an internal standard. The crude reaction mixture was passed through a plug of whatman filter paper in a Pasteur pipette and then analyzed by GC chromatography and NMR spectroscopy without additional purification. Conversion: <5%; Yield: <5%.

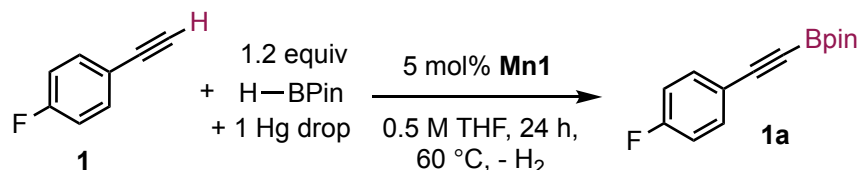

**4.4 Catalytic reaction in the presence of a Hg drop.** In an argon-filled glovebox a J. Young flask was charged with a magnetic stir bar and the reagents in the following order- **Mn1** (12 mg, 0.015 mmol), THF (0.52 mL), 4-Fluorophenylacetylene (33  $\mu$ L, 0.3 mmol), HBPIn (52  $\mu$ L, 0.36 mmol) and a drop of Hg. The tube was sealed, and the resulting mixture was stirred at 60  $^{\circ}$ C for 24 hours. The reaction was brought into the glovebox and the crude reaction mixture was diluted with THF and passed through a plug of silica gel in a Pasteur pipette and then analyzed by <sup>19</sup>F NMR spectroscopy without additional purification. Conversion: 91%; Yield: 51%.

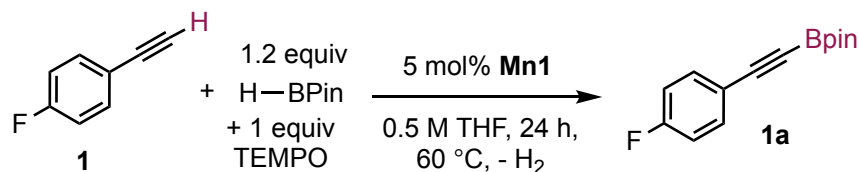

**4.5 Catalytic reaction in the presence of TEMPO (2,2,6,6-tetramethyl-1-piperidinyloxy).** In an argon-filled glovebox a J. Young flask was charged with a magnetic stir bar and the reagents in the following order- **Mn1** (12 mg, 0.015 mmol), THF (0.52 mL), 4-Fluorophenylacetylene (33  $\mu$ L, 0.3 mmol), HBPIn (52  $\mu$ L, 0.36 mmol) and TEMPO (47  $\mu$ L, 0.3 mmol). The tube was sealed, and the resulting mixture was stirred at 60  $^{\circ}$ C for 24 hours. The reaction was brought into the glovebox and the crude reaction mixture was diluted with THF and passed through a plug of silica gel in a Pasteur pipette and then analyzed by NMR spectroscopy without additional purification. Conversion: 31%; Yield: 31%.

## 5. Characterization of alkynylboronate esters

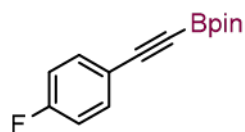

**2-((4-Fluorophenyl)ethynyl)-4,4,5,5-tetramethyl-1,3,2-dioxaborolane (1a).** The compound was prepared according to the general procedure using 4-fluorophenylacetylene (34  $\mu$ L, 0.3 mmol) as the terminal alkyne. Yield (Crude yield): >99%.

**$^1\text{H}$  NMR** (400 MHz,  $\text{C}_6\text{D}_6$ , 23  $^\circ\text{C}$ ):  $\delta$ . 1.01 (12H, s), 6.48 (2H, d), 7.13 (2H, d).

**$^{13}\text{C}\{^1\text{H}\}$  NMR** (400 MHz,  $\text{C}_6\text{D}_6$ , 23  $^\circ\text{C}$ ):  $\delta$ . 24.71, 84.15, 100.68, 115.92 (d), 118.68 (d), 128.30, 134.72 (d), 162.07, 164.33.

**$^{11}\text{B}$  NMR** (500 MHz,  $\text{C}_6\text{D}_6$ , 23  $^\circ\text{C}$ ):  $\delta$ . 24.40.

**$^{19}\text{F}$  NMR** (400 MHz,  $\text{C}_6\text{D}_6$ , 23  $^\circ\text{C}$ ):  $\delta$ . -109.18.

The spectroscopic data matched that previously reported.<sup>10,11</sup>

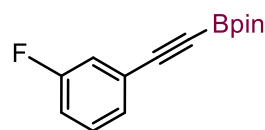

**2-((3-Fluorophenyl)ethynyl)-4,4,5,5-tetramethyl-1,3,2-dioxaborolane (2a).** The compound was prepared according to the general procedure using 3-fluorophenylacetylene (34  $\mu$ L, 0.3 mmol) as the terminal alkyne. Yield (Crude yield): >99%.

**$^1\text{H}$  NMR** (400 MHz,  $\text{C}_6\text{D}_6$ , 23  $^\circ\text{C}$ ):  $\delta$ . 1.03 (12H, s), 6.56- 6.65 (2H,m), 6.97-7.02 (2H,m).

**$^{13}\text{C}\{^1\text{H}\}$  NMR** (400 MHz,  $\text{C}_6\text{D}_6$ , 23  $^\circ\text{C}$ ):  $\delta$ . 24.69, 24.95, 84.26, 116.61(d), 119.20(d), 124.43(d), 130.15(d), 161.37, 163.82.

**$^{11}\text{B}$  NMR** (400 MHz,  $\text{C}_6\text{D}_6$ , 23  $^\circ\text{C}$ ):  $\delta$ . 24.76.

**$^{19}\text{F}$  NMR** (400 MHz,  $\text{C}_6\text{D}_6$ , 23  $^\circ\text{C}$ ):  $\delta$ . -112.16.

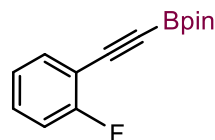

**2-((2-Fluorophenyl)ethynyl)-4,4,5,5-tetramethyl-1,3,2-dioxaborolane (3a).** The compound was prepared according to the general procedure using 2-fluorophenylacetylene (34  $\mu$ L, 0.3 mmol) as the terminal alkyne. Yield (Crude yield): >99%.

**$^1\text{H}$  NMR** (400 MHz,  $\text{C}_6\text{D}_6$ , 23  $^\circ\text{C}$ ):  $\delta$ . 1.01 (12H, s), 6.50-6.54 (1H, t), 6.58- 6.62 (1H, t), 6.68-6.73 (1H, t) (obscured by mesitylene), 7.18-7.22 (1H, s).

**$^{13}\text{C}\{^1\text{H}\}$  NMR** (400 MHz,  $\text{C}_6\text{D}_6$ , 23 °C):  $\delta$ . 24.69, 24.94, 84.27, 106.30, 111.28 (d), 115.63 (d), 124.07 (d), 131.12 (d), 134.46, 162.57, 165.09.

**$^{11}\text{B}$  NMR** (400 MHz,  $\text{C}_6\text{D}_6$ , 23 °C):  $\delta$ . 24.66.

**$^{19}\text{F}$  NMR** (400 MHz,  $\text{C}_6\text{D}_6$ , 23 °C):  $\delta$ . -108.67.

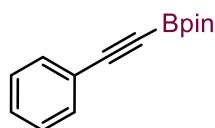

**4,4,5,5-Tetramethyl-2-(phenylethynyl)-1,3,2-dioxaborolane (4a).** The compound was prepared according to the general procedure using phenylacetylene (33  $\mu\text{L}$ , 0.3 mmol) as the terminal alkyne. Yield (Isolated yield): 88 %.

**$^1\text{H}$  NMR** (500 MHz,  $\text{C}_6\text{D}_6$ , 23 °C):  $\delta$ . 1.03 (12H, s), 6.85-6.91 (3H, m), 7.36-7.38 (2H, d).

**$^{13}\text{C}\{^1\text{H}\}$  NMR** (400 MHz,  $\text{C}_6\text{D}_6$ , 23 °C):  $\delta$ . 24.73, 84.16, 101.84, 122.70, 128.56, 129.34, 132.67

**$^{11}\text{B}$  NMR** (500 MHz,  $\text{C}_6\text{D}_6$ , 23 °C):  $\delta$ . 24.74.

The spectroscopic data matched that previously reported.<sup>10</sup>

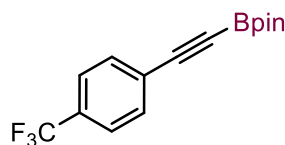

**4,4,5,5-Tetramethyl-2-((4-(trifluoromethyl)phenyl)ethynyl)-1,3,2-dioxaborolane (5a).** The compound was prepared according to the general procedure using 1-ethynyl-4-(trifluoromethyl)benzene (49  $\mu\text{L}$ , 0.3 mmol) as the terminal alkyne. Yield (Crude yield): >99% .

**$^1\text{H}$  NMR** (500 MHz,  $\text{C}_6\text{D}_6$ , 23 °C):  $\delta$ . 1.04 (12H, s), 7.02-7.04 (2H, d), 7.14-7.16 (2H, d).

**$^{13}\text{C}\{^1\text{H}\}$  NMR** (400 MHz,  $\text{C}_6\text{D}_6$ , 23 °C):  $\delta$ . 24.67, 84.42, 99.87, 125.41 (q), 126.18, 130.64(q), 132.83.

**$^{11}\text{B}$  NMR** (500 MHz,  $\text{C}_6\text{D}_6$ , 23 °C):  $\delta$ . 24.32.

**$^{19}\text{F}$  NMR** (400 MHz,  $\text{C}_6\text{D}_6$ , 23 °C):  $\delta$ . -62.92.

The spectroscopic data matched that previously reported.<sup>10</sup>

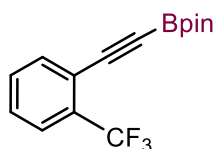

**4,4,5,5-Tetramethyl-2-((2-(trifluoromethyl)phenyl)ethynyl)-1,3,2-dioxaborolane (6a).** The compound was prepared according to the general procedure using 1-ethynyl-2-(trifluoromethyl)benzene (41  $\mu$ L, 0.3 mmol) as the terminal alkyne. Yield (Crude yield): 92%.

**$^1\text{H}$  NMR** (400 MHz,  $\text{C}_6\text{D}_6$ , 23  $^\circ\text{C}$ ):  $\delta$ . 0.98 (12H, s), 6.62-6.71 (2H, m), 7.17-7.19 (1H, d), 7.26-7.28 (1H, d).

**$^{13}\text{C}\{^1\text{H}\}$  NMR** (400 MHz,  $\text{C}_6\text{D}_6$ , 23  $^\circ\text{C}$ ):  $\delta$ . 24.66, 84.35, 125.91 (q), 128.96, 131.37, 135.17.

**$^{11}\text{B}$  NMR** (400 MHz,  $\text{C}_6\text{D}_6$ , 23  $^\circ\text{C}$ ):  $\delta$ . 24.98.

**$^{19}\text{F}$  NMR** (400 MHz,  $\text{C}_6\text{D}_6$ , 23  $^\circ\text{C}$ ):  $\delta$ . -61.56.

The spectroscopic data matched that previously reported.<sup>12</sup>

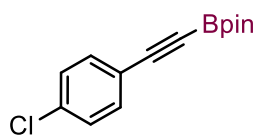

**2-((4-Chlorophenyl)ethynyl)-4,4,5,5-tetramethyl-1,3,2-dioxaborolane (7a).** The compound was prepared according to the general procedure using 1-chloro-4-ethynylbenzene (41 mg, 0.3 mmol) as the terminal alkyne. Yield (Crude yield): 93%.

**$^1\text{H}$  NMR** (400 MHz,  $\text{C}_6\text{D}_6$ , 23  $^\circ\text{C}$ ):  $\delta$ . 1.02 (12H, s), 6.75-6.77 (2H, d), 7.03-7.05 (2H, d).

**$^{13}\text{C}\{^1\text{H}\}$  NMR** (400 MHz,  $\text{C}_6\text{D}_6$ , 23  $^\circ\text{C}$ ):  $\delta$ . 24.69, 84.40, 100.51, 120.90, 127.35, 128.91, 133.89, 135.51.

**$^{11}\text{B}$  NMR** (400 MHz,  $\text{C}_6\text{D}_6$ , 23  $^\circ\text{C}$ ):  $\delta$ . 24.80.

The spectroscopic data matched that previously reported.<sup>11</sup>

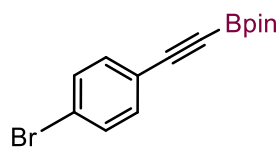

**2-((4-Bromophenyl)ethynyl)-4,4,5,5-tetramethyl-1,3,2-dioxaborolane (8a).** The compound was prepared according to the general procedure using 1-bromo-4-ethynylbenzene (54 mg, 0.3 mmol) as the terminal alkyne. Yield (Isolated yield): 68%.

**$^1\text{H}$  NMR** (400 MHz,  $\text{C}_6\text{D}_6$ , 23  $^\circ\text{C}$ ):  $\delta$ . 1.02 (12H, s), 6.89-6.91 (2H, d), 6.94-6.96 (2H, d).

**$^{13}\text{C}\{^1\text{H}\}$  NMR** (400 MHz,  $\text{C}_6\text{D}_6$ , 23  $^\circ\text{C}$ ):  $\delta$ . 24.68, 84.22, 100.60, 121.31, 123.87, 131.83, 134.02.

**$^{11}\text{B}$  NMR** (400 MHz, 128,  $\text{C}_6\text{D}_6$ , 23  $^\circ\text{C}$ ):  $\delta$ . 24.67.



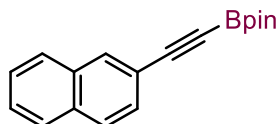

**4,4,5,5-tetramethyl-2-[2-(naphthalen-2-yl)ethynyl]-1,3,2-dioxaborolane (9a).** The compound was prepared according to the general procedure using 2-ethynyl-naphthalene (45 mg, 0.3 mmol) as the terminal alkyne. Yield (Isolated yield): 92%.

**<sup>1</sup>H NMR** (500 MHz, C<sub>6</sub>D<sub>6</sub>, 23 °C): δ. 1.06 (12H, s), 7.13-7.17 (2H, m), 7.30-7.33 (1H, m), 7.34-7.36 (1H, m), 7.39-7.43 (2H, m), 7.88 (1H, s).

**<sup>13</sup>C{<sup>1</sup>H} NMR** (500 MHz, C<sub>6</sub>D<sub>6</sub>, 23 °C): δ. 24.75, 84.15, 119.97, 126.72, 127.22, 127.82, 128.41, 128.81, 133.25, 133.41, 133.66.

**<sup>11</sup>B NMR** (500 MHz, C<sub>6</sub>D<sub>6</sub>, 23 °C): δ. 24.83

The spectroscopic data matched that previously reported.<sup>11</sup>

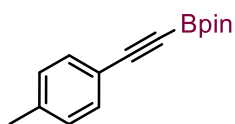

**4,4,5,5-Tetramethyl-2-(4-methylphenylethynyl)-1,3,2-dioxaborolane (10a).** The compound was prepared according to the general procedure using 4-ethynyltoluene (38 μL, 0.3 mmol) as the terminal alkyne. Yield (Isolated yield): 78%.

**<sup>1</sup>H NMR** (400 MHz, C<sub>6</sub>D<sub>6</sub>, 23 °C): δ. 1.04 (12H,s), 1.89 (3H,s), 6.69-6.71 (2H, d), 7.32-7.34 (2H, d)

**<sup>13</sup>C{<sup>1</sup>H} NMR** (400 MHz, C<sub>6</sub>D<sub>6</sub>, 23 °C): δ. 21.30, 24.74, 84.01, 119.78, 129.37, 132.73, 139.50.

**<sup>11</sup>B NMR** (400 MHz, C<sub>6</sub>D<sub>6</sub>, 23 °C): δ. 24.84.

The spectroscopic data matched that previously reported.<sup>10</sup>

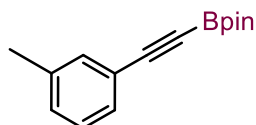

**4,4,5,5-Tetramethyl-2-(3-methylphenylethynyl)-1,3,2-dioxaborolane (11a).** The compound was prepared according to the general procedure using 3-ethynyltoluene (35 μL, 0.3 mmol) as the terminal alkyne. Yield (Isolated yield): 91%.

**<sup>1</sup>H NMR** (500 MHz, C<sub>6</sub>D<sub>6</sub>, 23 °C): δ. 1.03 (12 H, s), 1.86 (3H,s), 6.75 (1H,d), 6.82 (1H,t), 7.19 (1H,s), 7.27 (1H,d)

**$^{13}\text{C}\{^1\text{H}\}$  NMR** (400 MHz,  $\text{C}_6\text{D}_6$ , 23 °C):  $\delta$ . 20.94, 24.71, 84.04, 102.21, 122.53, 128.49, 129.86, 130.32, 133.40, 138.17

**$^{11}\text{B}$  NMR** (400 MHz,  $\text{C}_6\text{D}_6$ , 23 °C):  $\delta$ . 24.69.

The spectroscopic data matched that previously reported.<sup>10</sup>

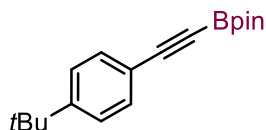

**2-((4-*tert*-butylphenyl)ethynyl)-4,4,5,5-Tetramethyl-1,3,2-dioxaborolane (12a).** The compound was prepared according to the general procedure using *tert*-butyl phenylacetylene (54  $\mu\text{L}$ , 0.3 mmol) as the terminal alkyne. Yield (Crude yield): 93%.

**$^1\text{H}$  NMR** (500 MHz,  $\text{C}_6\text{D}_6$ , 23 °C):  $\delta$ . 1.04 (12H,s), 1.05 (9H,s), 6.98 (2H,d), 7.42 (2H,d).

**$^{13}\text{C}\{^1\text{H}\}$  NMR** (500 MHz,  $\text{C}_6\text{D}_6$ , 23 °C):  $\delta$ . 24.74, 31.05, 34.71, 84.03, 119.90, 125.69, 127.37, 132.67, 152.54.

**$^{11}\text{B}$  NMR** (500 MHz,  $\text{C}_6\text{D}_6$ , 23 °C):  $\delta$ . 24.73.

The spectroscopic data matched that previously reported.<sup>10</sup>

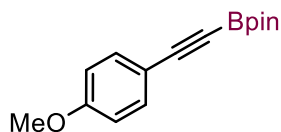

**2-((4-Methoxyphenyl)ethynyl)-4,4,5,5-tetramethyl-1,3,2-dioxaborolane (13a).** The compound was prepared according to the general procedure using 4-ethynylanisole (39  $\mu\text{L}$ , 0.3 mmol) as the terminal alkyne. Yield (Crude yield): 97%.

**$^1\text{H}$  NMR** (400 MHz,  $\text{C}_6\text{D}_6$ , 23 °C):  $\delta$ . 1.04 (12H, s), 3.12 (3H,s), 6.43-6.45 (2H, d), 7.33-7.35 (2H, d).

**$^{13}\text{C}\{^1\text{H}\}$  NMR** (400 MHz,  $\text{C}_6\text{D}_6$ , 23 °C):  $\delta$ . 24.73, 54.71, 83.95, 114.31, 114.58, 134.42, 160.75.

**$^{11}\text{B}$  NMR** (400 MHz,  $\text{C}_6\text{D}_6$ , 23 °C):  $\delta$ . 24.94.

The spectroscopic data matched that previously reported.<sup>10</sup>

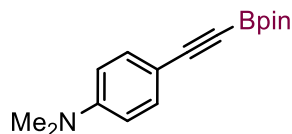

**4,4,5,5-Tetramethyl-2-((*p*-*N,N*-dimethylaniline)ethynyl)-1,3,2-dioxaborolane (14a).** The compound was prepared according to the general procedure using 4-ethynyl-*N,N*-dimethylaniline (44 mg, 0.3 mmol) as the terminal alkyne. Yield (Crude yield): 62%.

**<sup>1</sup>H NMR** (400 MHz, C<sub>6</sub>D<sub>6</sub>, 23 °C): δ. 1.06 (12H, s), 2.31 (6H, s), 6.18-6.21 (2H, d), 7.42-7.45 (2H, d).

**<sup>13</sup>C{<sup>1</sup>H} NMR** (400 MHz, C<sub>6</sub>D<sub>6</sub>, 23 °C): δ. 24.80, 39.50, 83.72, 109.39, 111.9, 134.19, 150.82.

**<sup>11</sup>B NMR** (400 MHz, C<sub>6</sub>D<sub>6</sub>, 23 °C): δ. 25.17.

The spectroscopic data matched that previously reported.<sup>10</sup>

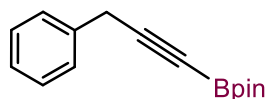

**4,4,5,5-Tetramethyl-2-(3-phenylprop-1-yn-1-yl)-1,3,2-dioxaborolane (15a).** The compound was prepared according to the general procedure using 3-phenyl-1-propyne (37 μL, 0.3 mmol) as the terminal alkyne. Yield (Isolated yield): 54%.

**<sup>1</sup>H NMR** (500 MHz, C<sub>6</sub>D<sub>6</sub>, 23 °C): δ. 1.03 (12H, s), 3.32 (2H, s), 7.02-7.07 (3H, m), 7.17 (2H, m).

**<sup>13</sup>C{<sup>1</sup>H} NMR** (500 MHz, C<sub>6</sub>D<sub>6</sub>, 23 °C): δ. 24.78, 25.91, 83.82, 101.45, 126.88, 128.25, 128.76, 135.28.

**<sup>11</sup>B NMR** (500 MHz, C<sub>6</sub>D<sub>6</sub>, 23 °C): δ. 24.14.

The spectroscopic data matched that previously reported.<sup>10</sup>

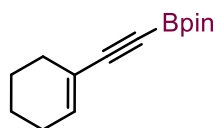

**2-[2-(1-cyclohexenyl)ethynyl]-4,4,5,5-tetramethyl-1,3,2-dioxaborolane (16a).** The compound was prepared according to the general procedure using 1-ethynylcyclohexene (35 μL, 0.3 mmol) as the terminal alkyne. Yield (Crude yield): 71%.

**<sup>1</sup>H NMR** (500 MHz, C<sub>6</sub>D<sub>6</sub>, 23 °C): δ. 1.01 (12H, s), 1.20 (2H, m), 1.26 (2H, m), 1.69 (2H, m), 2.05 (2H, m), 6.17 (1H, sept.)

**<sup>13</sup>C{<sup>1</sup>H} NMR** (500 MHz, C<sub>6</sub>D<sub>6</sub>, 23 °C): δ. 21.51, 22.28, 24.75, 25.80, 28.95, 83.77, 106.28, 120.87, 138.08

**<sup>11</sup>B NMR** (500 MHz, C<sub>6</sub>D<sub>6</sub>, 23 °C): δ. 24.89.

The spectroscopic data matched that previously reported.<sup>10</sup>

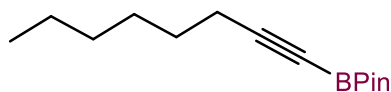

**4,4,5,5-Tetramethyl-2-(oct-1yn-1yl)-1,3,2-dioxaborolane (17a).** The compound was prepared according to the general procedure using 1-octyne (44  $\mu$ L, 0.3 mmol) as the terminal alkyne. Yield (Isolated yield): 51%.

**$^1\text{H}$  NMR** (500 MHz,  $\text{C}_6\text{D}_6$ , 23  $^\circ\text{C}$ ):  $\delta$ . 0.78 (3H, t), 1.01 (12H, s), 1.02-1.05(2H, m), 1.15-1.21 (4H, m), 1.27-1.31 (2H, m), 1.97 (2H, t).

**$^{13}\text{C}\{^1\text{H}\}$  NMR** (400 MHz,  $\text{C}_6\text{D}_6$ , 23  $^\circ\text{C}$ ):  $\delta$ . 14.28, 19.72, 22.82, 24.73, 28.48, 28.76, 31.60, 83.61, 106.28.

**$^{11}\text{B}$  NMR** (400 MHz,  $\text{C}_6\text{D}_6$ , 23  $^\circ\text{C}$ ):  $\delta$ . 24.01.

The spectroscopic data matched that previously reported.<sup>12</sup>

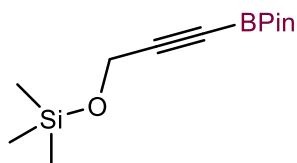

**4,4,5,5-Tetramethyl-2-(propargyloxytrimethylsilylethynyl)-1,3,2-dioxaborolane (18a).** The compound was prepared according to the general procedure using (propargyloxy)trimethylsilane (46  $\mu$ L, 0.3 mmol) as the terminal alkyne. Yield (Isolated yield): 50%.

**$^1\text{H}$  NMR** (500 MHz,  $\text{C}_6\text{D}_6$ , 23  $^\circ\text{C}$ ):  $\delta$ . 0.08 (9H, s), 0.98 (12h, s), 4.08 (2H, s).

**$^{13}\text{C}\{^1\text{H}\}$  NMR** (400 MHz,  $\text{C}_6\text{D}_6$ , 23  $^\circ\text{C}$ ):  $\delta$ . -0.43, 24.68, 51.43, 83.98, 106.25.

**$^{11}\text{B}$  NMR** (500 MHz,  $\text{C}_6\text{D}_6$ , 23  $^\circ\text{C}$ ):  $\delta$ . 24.16

The spectroscopic data matched that previously reported.<sup>11</sup>

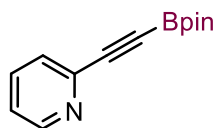

**4,4,5,5-Tetramethyl-2-(2-pyridylethynyl)-1,3,2-dioxaborolane (19a).** The compound was prepared according to the general procedure using 2-Ethynylpyridine (30  $\mu$ L, 0.3 mmol) as the terminal alkyne. Yield (Isolated yield): 13%.

**$^1\text{H}$  NMR** (400  $\text{C}_6\text{D}_6$ , 23  $^\circ\text{C}$ ):  $\delta$ . 1.00 (12H, s), 6.48 (1H, t), 6.79 (1H, t), 7.07-7.09 (1H, d), 8.31 (1H, d).

$^{13}\text{C}\{^1\text{H}\}$  NMR (400 MHz,  $\text{C}_6\text{D}_6$ , 23 °C):  $\delta$ . 24.67, 84.33, 101.00, 123.40, 135.58, 143.08, 150.45.

$^{11}\text{B}$  NMR (400 MHz,  $\text{C}_6\text{D}_6$ , 23 °C):  $\delta$ . 24.80.

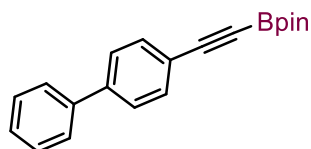

**2-((1,1'-biphenyl)-4-ylethynyl)-4,4,5,5-Tetramethyl-1,3,2-dioxaborolane (20a).** The compound was prepared according to the general procedure using 4-ethynyl-1,1'-biphenyl (53 mg, 0.3 mmol) as the terminal alkyne. Yield (Isolated yield): 10%.

$^1\text{H}$  NMR (500 MHz,  $\text{C}_6\text{D}_6$ , 23 °C):  $\delta$ . 1.05 (12H,s), 7.09-7.11 (1H,m), 7.13-7.16 (4H,m) (obscured by  $\text{C}_6\text{D}_6$ ), 7.24-7.26 (2H,d), 7.44-7.45 (2H, d).

$^{13}\text{C}\{^1\text{H}\}$  NMR (400 MHz,  $\text{C}_6\text{D}_6$ , 23 °C):  $\delta$ . 24.75, 24.94, 84.13, 121.51, 127.31, 127.64, 127.95, 129.02, 133.24, 140.47, 142.24, 149.83.

$^{11}\text{B}$  NMR (500 MHz,  $\text{C}_6\text{D}_6$ , 23 °C):  $\delta$ . 24.78.

## 6. Preparation of 4-fluorophenylacetylene-*d*

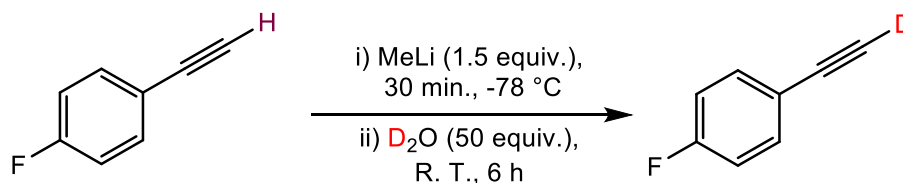

4-fluorophenylacetylene-*d* was prepared by dropwise addition of MeLi (3.4 mL of a 1.6 M solution in diethyl ether, 5.39 mmol) to a solution of 4-fluorophenylacetylene (0.55 mL, 4.9 mmol) in diethyl ether (25 mL) at -78 °C. After stirring the contents at -78 °C for 30 min,  $\text{D}_2\text{O}$  (2 mL, 110.8 mmol) was added and the contents were left for stirring at room temperature for 6 hours followed by separation of organic layer. The organic layer was dried using  $\text{MgSO}_4$  and removal of the solvent in vacuo resulted in the formation of the product with >99 % deuterium incorporation.

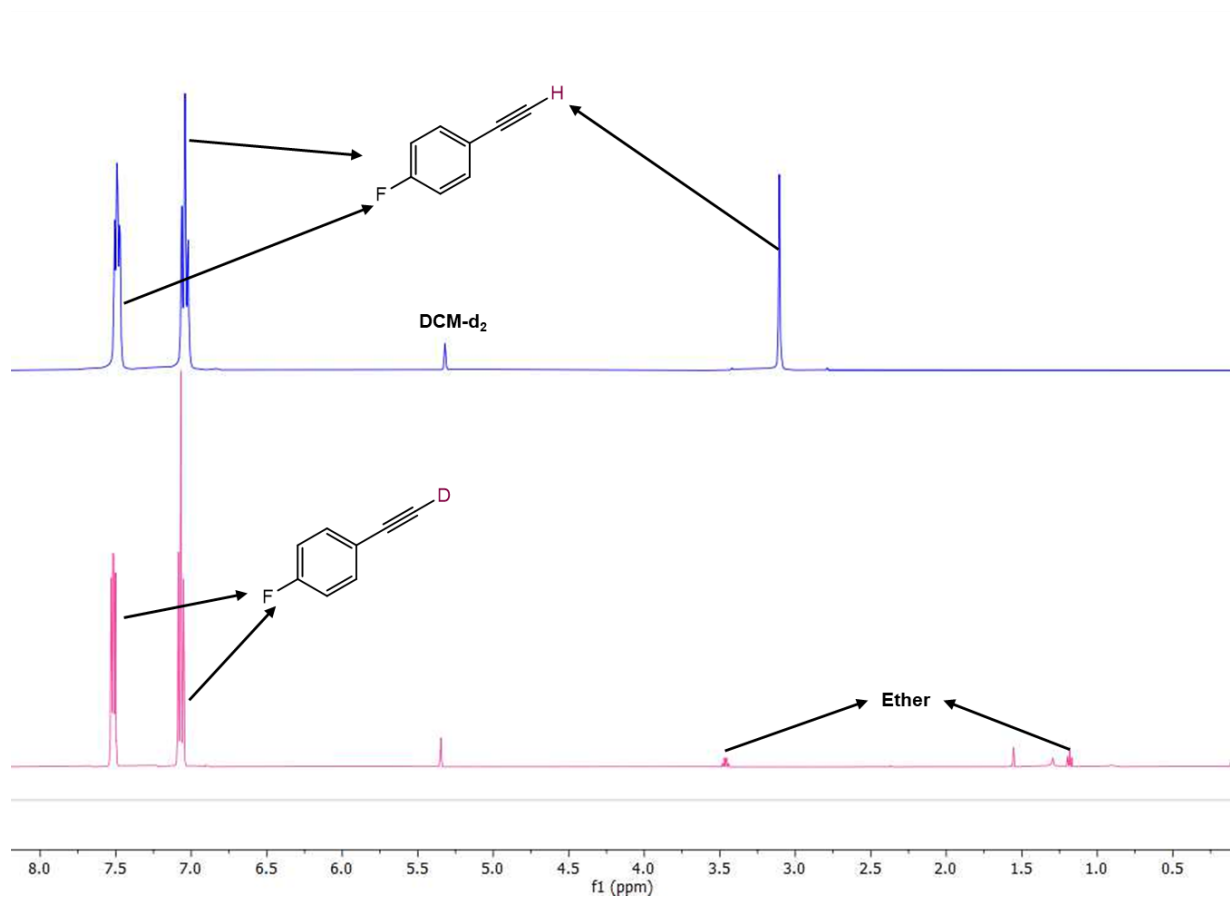

**Figure S1:** Stacked <sup>1</sup>H NMR spectra of 4-fluorophenylacetylene (top) and 4-fluorophenylacetylene-*d* (down) in DCM-*d*<sub>2</sub>. (No signal corresponding to alkynyl proton in 4-fluorophenylacetylene-*d* spectrum)

## 7. NMR Monitoring of Catalytic and Stoichiometric Reactions.

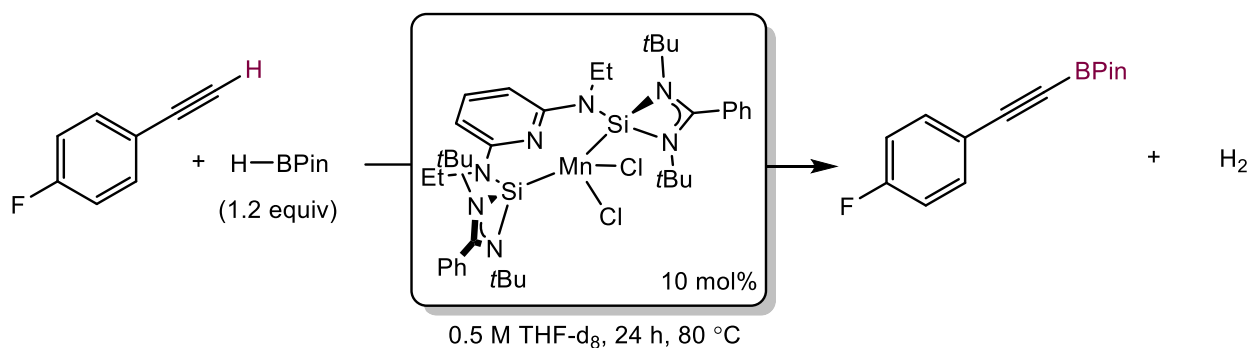

**7.1 NMR monitoring of the C-H borylation of 4-fluorophenylacetylene with HBPIn at 80 °C employing 10 mol% of Mn1 as precatalyst.** 4-Fluorophenylacetylene (20 μL, 0.174 mmol) was added to a solution of **Mn1** (14 mg, 0.0174 mmol) in THF-*d*<sub>8</sub> (0.30 mL) followed by the

addition of HBPIn (30  $\mu$ L, 0.208 mmol) and fluorobenzene (10  $\mu$ L, 0.106 mmol) as internal standard in a J. Young NMR tube in an argon filled glovebox. The tube was sealed and brought out of the glovebox. The headspace was evacuated by a freeze-pump-thaw cycle. The reaction was monitored by  $^1\text{H}$ ,  $^{11}\text{B}$  and  $^{19}\text{F}$  NMR spectroscopy at 80  $^\circ\text{C}$  for 24 hours (see Figures S1, S2 and S3). No signals attributable to diamagnetic manganese species were observed in the NMR spectra, however, signals attributable to the C-H borylation product (**1a**) were identified in the  $^{11}\text{B}$  and  $^{19}\text{F}$  NMR spectra and their intensity grew over time at the expense of those of the starting material. Signals corresponding to  $\text{H}_2$  formed as a byproduct were also identified in  $^1\text{H}$  NMR.

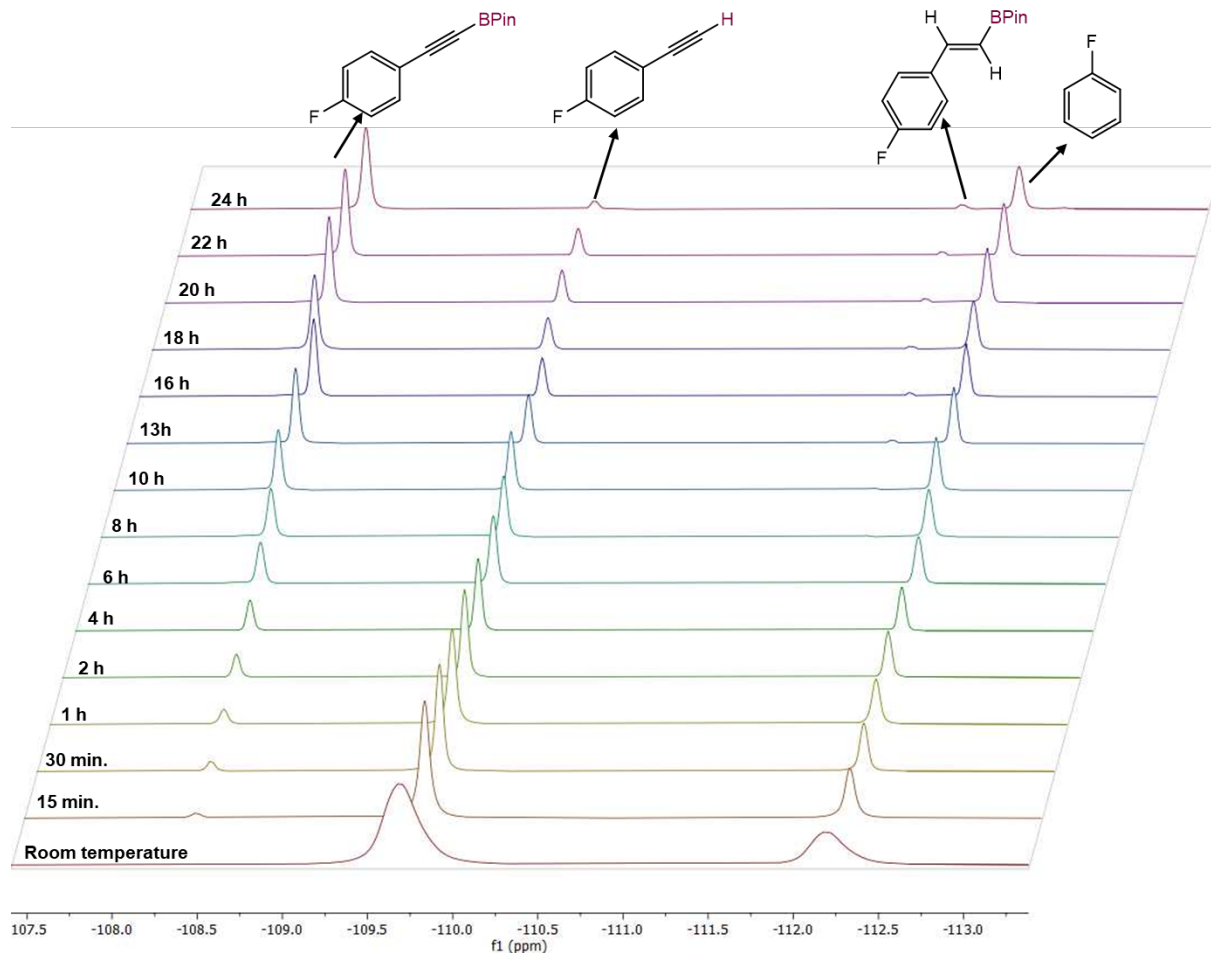

**Figure S2:**  $^{19}\text{F}$  NMR spectra of catalytic reaction in  $\text{THF-d}_8$  at 80  $^\circ\text{C}$ , using fluorobenzene as internal standard.

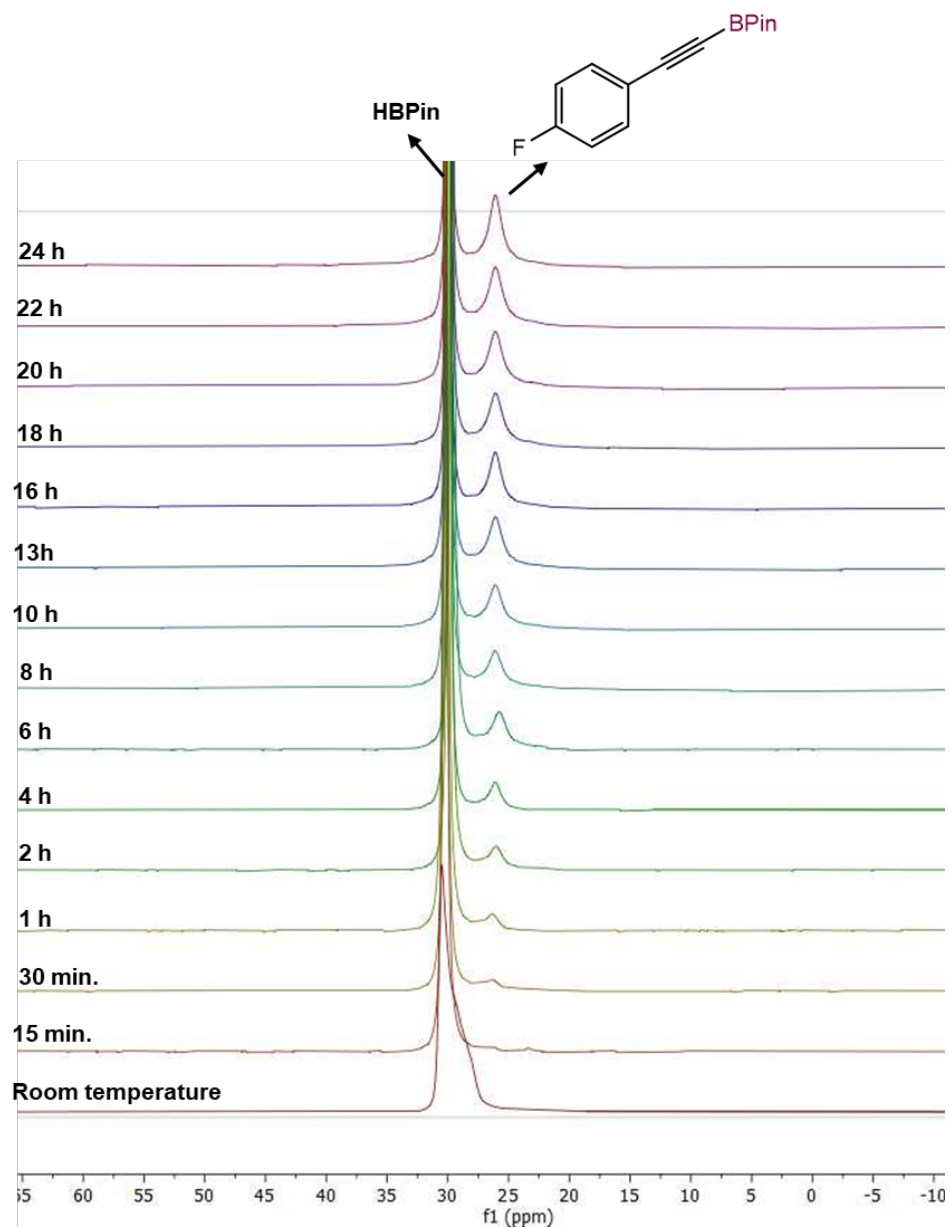

**Figure S3:**  $^{11}\text{B}$  NMR spectra of catalytic reaction in  $\text{THF-d}_8$  at  $80^\circ\text{C}$ , using fluorobenzene as internal standard.



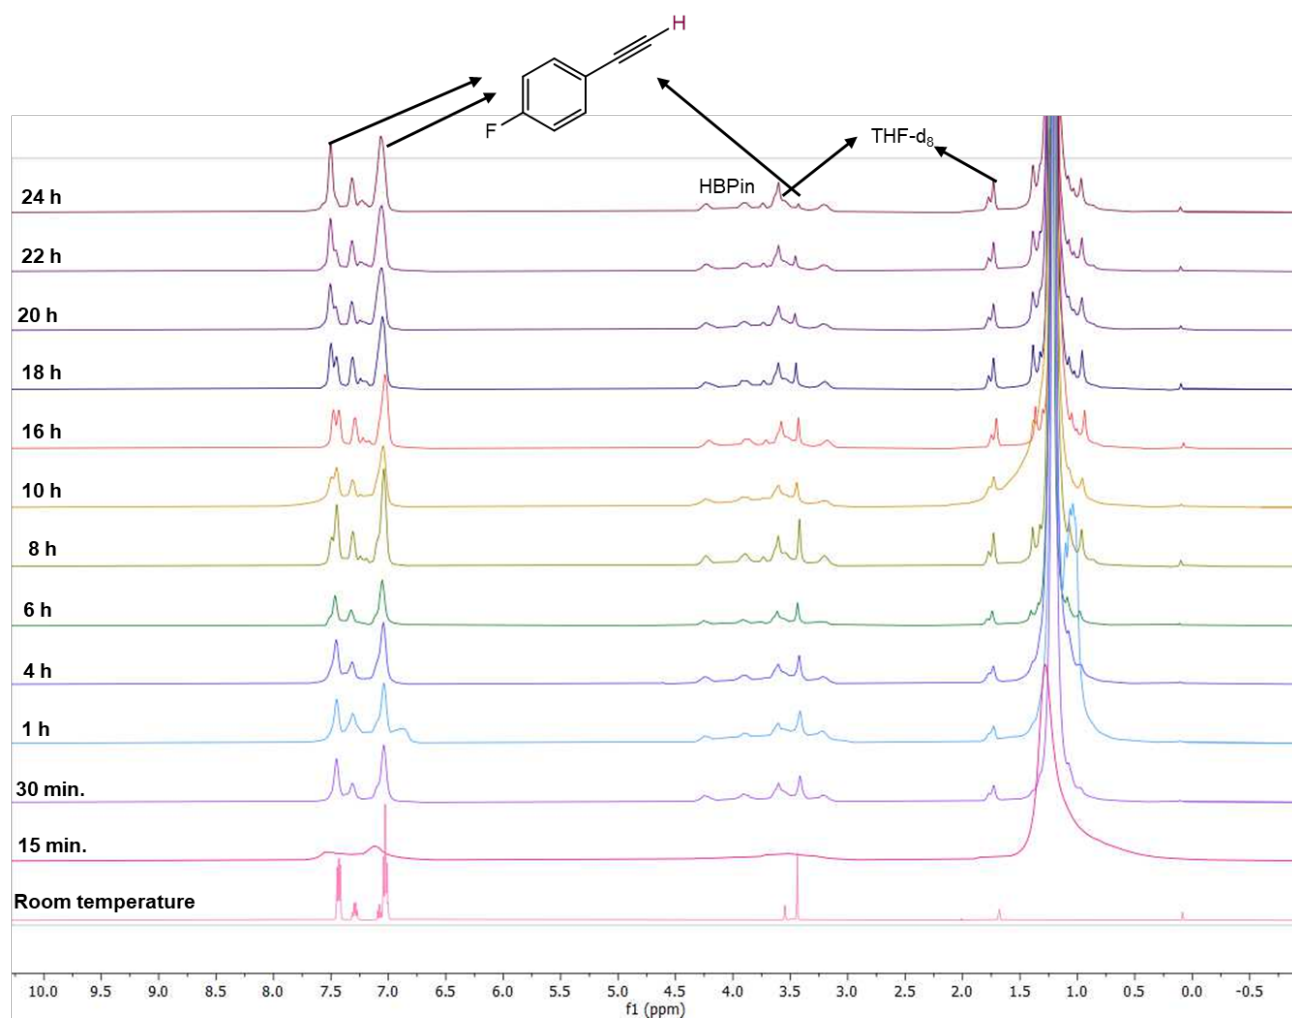

**Figure S4:**  $^1\text{H}$  NMR spectra of catalytic reaction in  $\text{THF-d}_8$  at  $80^\circ\text{C}$ .

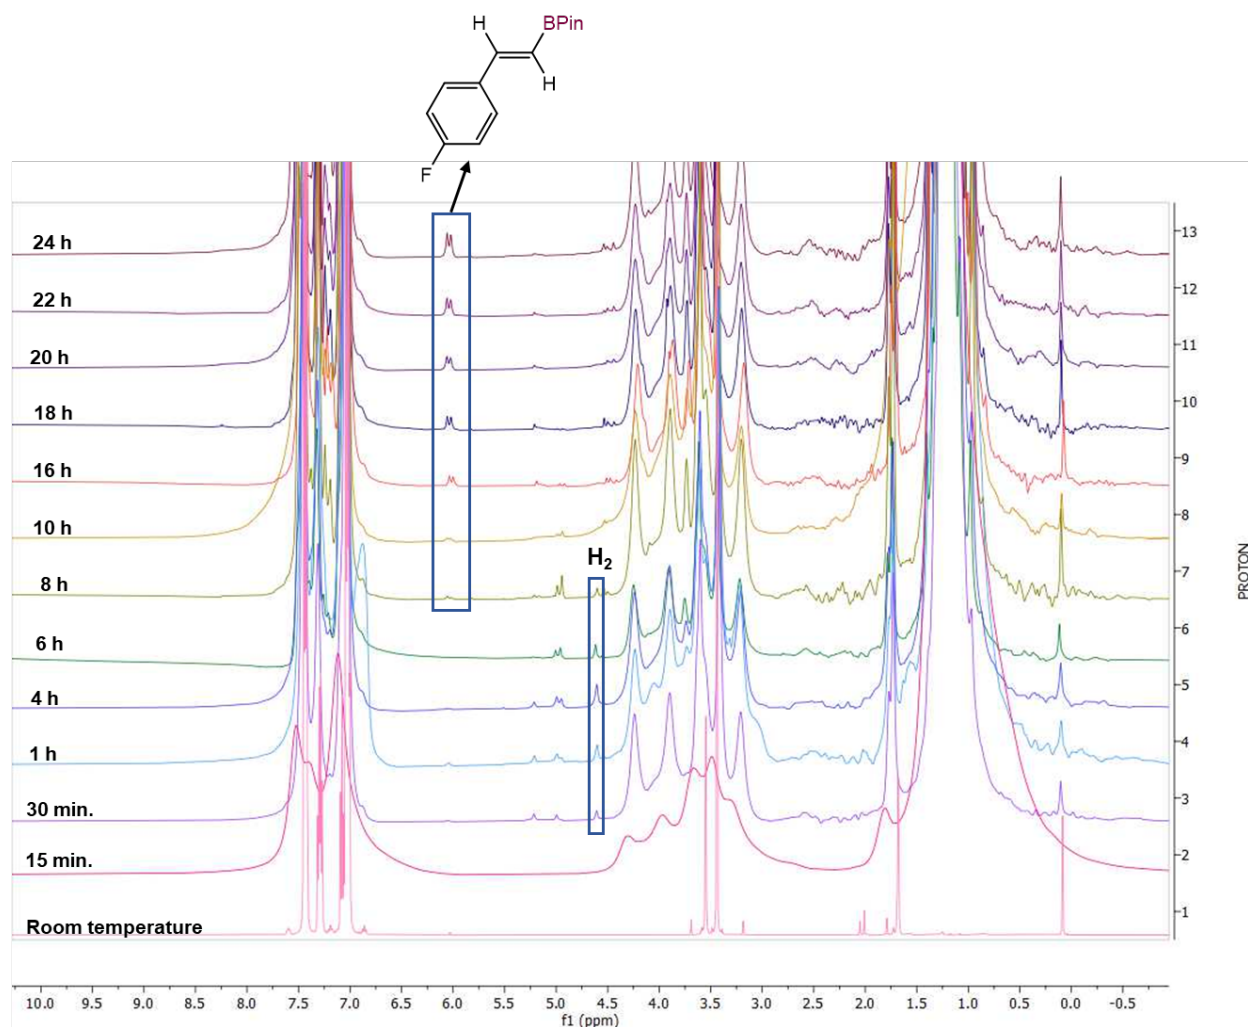

**Figure S5:**  $^1\text{H}$  NMR spectra of catalytic reaction in  $\text{THF-d}_8$  at  $80\text{ }^\circ\text{C}$ , highlighting  $\text{H}_2$  and alkene formation.

Note: The peak attributable to  $\text{H}_2$  grows in the spectra taken from 30 min to 8 hours, consistent with the formation of  $\text{H}_2$  during catalytic turnover. After this time the J. Young NMR tube was kept in the freezer overnight to stop the catalytic reaction due to the inability of monitoring overnight. Therefore, the  $\text{H}_2$  already formed was lost and no signal can be attributed to  $\text{H}_2$  after this time.

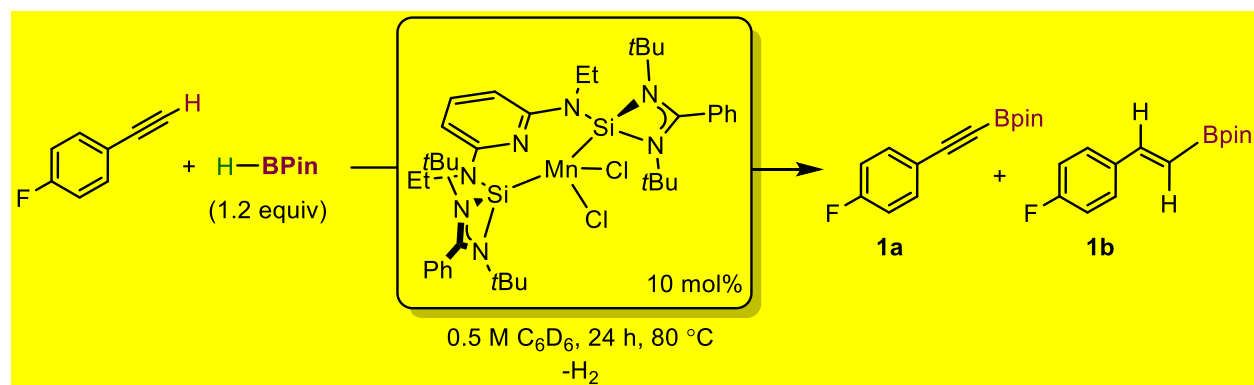

## 7.2 NMR monitoring of the C-H borylation of 4-fluorophenylacetylene with HBPIn at 80 °C employing 10 mol% of Mn1 as precatalyst in C<sub>6</sub>D<sub>6</sub>

4-Fluorophenylacetylene (20  $\mu$ L, 0.174 mmol) was added to a solution of **Mn1** (14 mg, 0.0174 mmol) in C<sub>6</sub>D<sub>6</sub> (0.30 mL) followed by the addition of HBPIn (30  $\mu$ L, 0.208 mmol) and fluorobenzene (10  $\mu$ L, 0.106 mmol) as internal standard in a J. Young NMR tube in an argon filled glovebox. The tube was sealed and brought out of the glovebox. The headspace was evacuated by a freeze-pump-thaw cycle. The reaction was monitored by <sup>1</sup>H, <sup>11</sup>B and <sup>19</sup>F NMR spectroscopy at 80 °C for 24 hours (see Figures S6, S7 and S8). No signals attributable to diamagnetic manganese species were observed in the NMR spectra, however, signals attributable to the C-H borylation product (**1a**) were identified in the <sup>11</sup>B and <sup>19</sup>F NMR spectra and their intensity grew over time at the expense of those of the starting material.

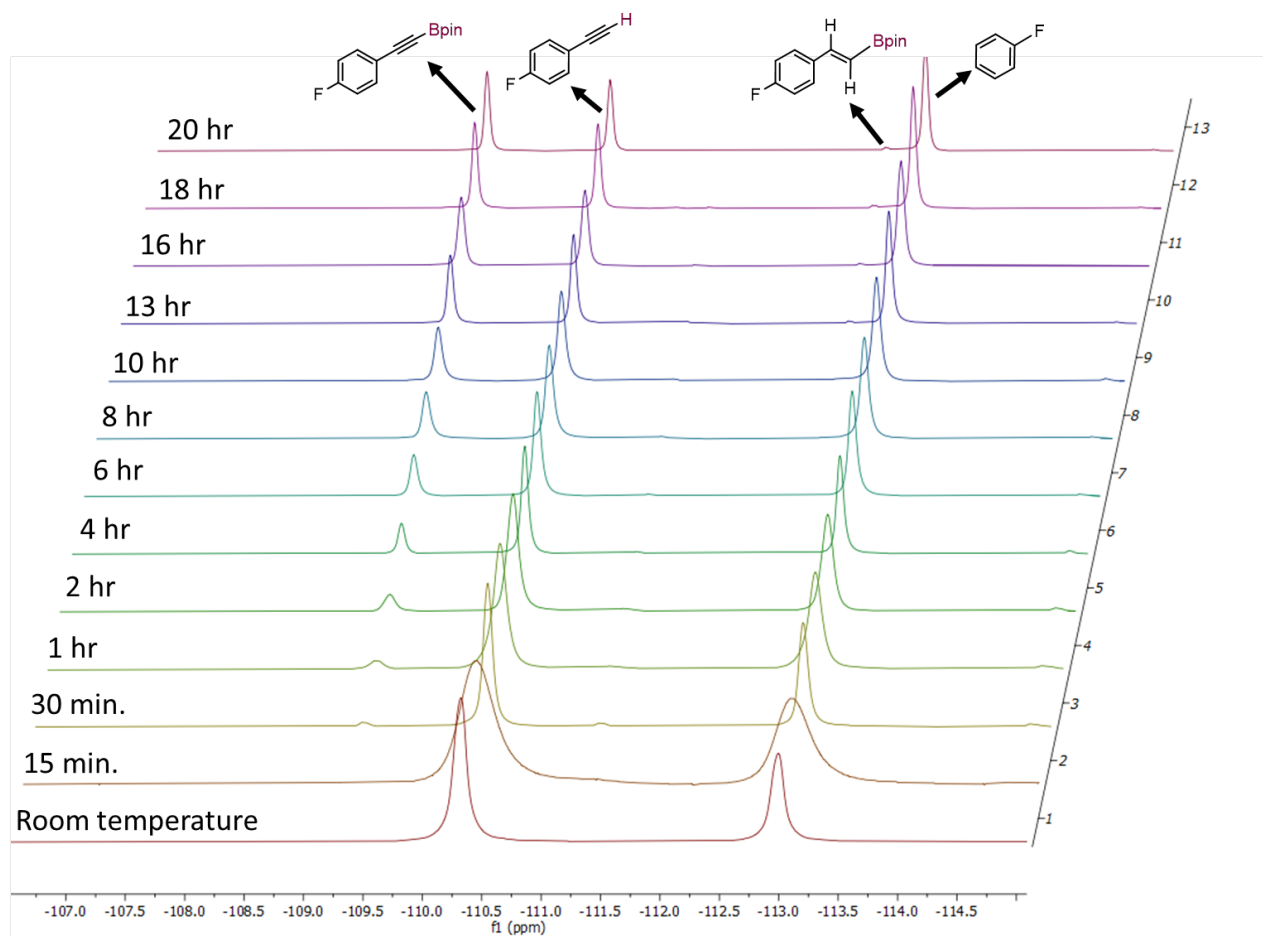

**Figure S6:**  $^{19}\text{F}$  NMR spectra of catalytic reaction in  $\text{C}_6\text{D}_6$  at 80 °C.

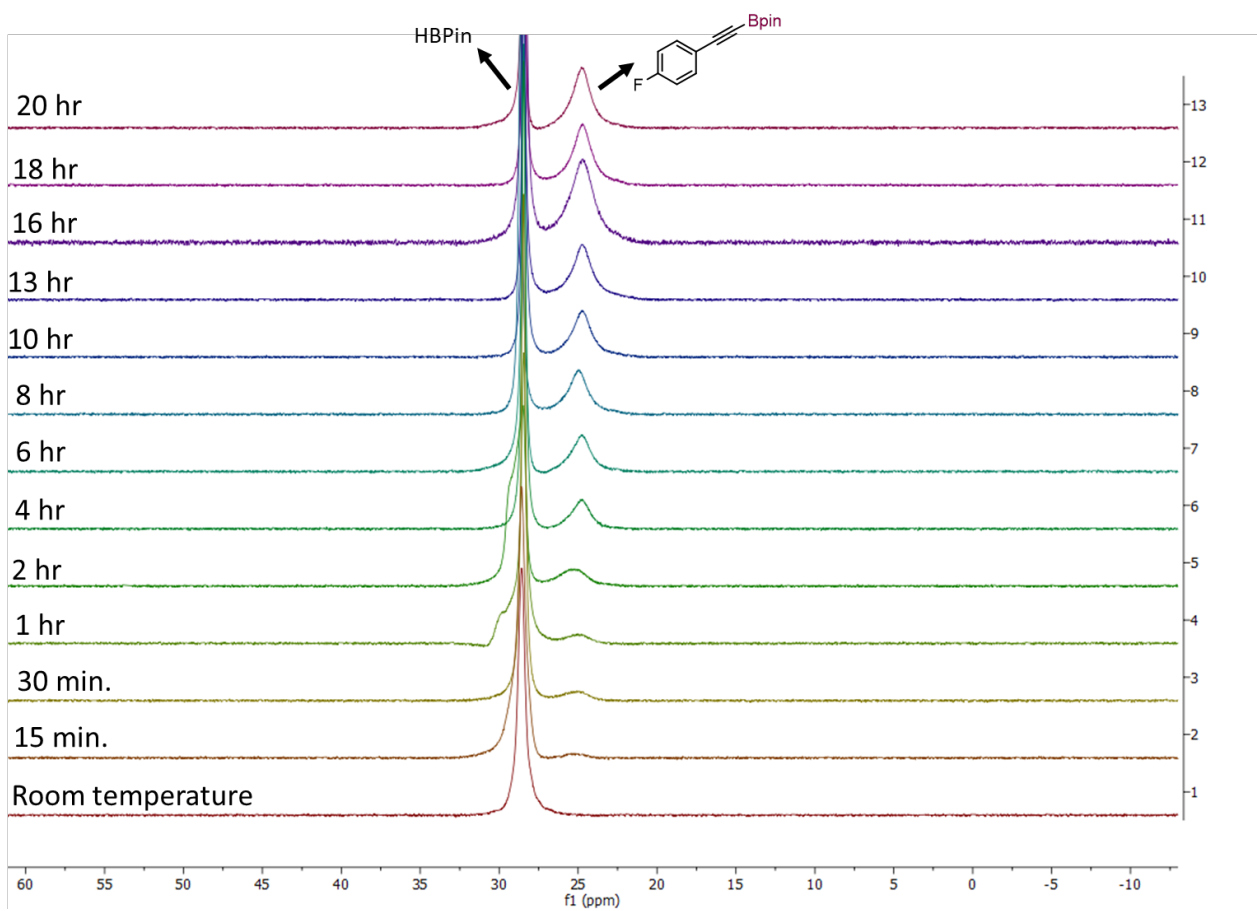

**Figure S7:**  $^{11}\text{B}$  NMR spectra of catalytic reaction in  $\text{C}_6\text{D}_6$  at 80 °C.

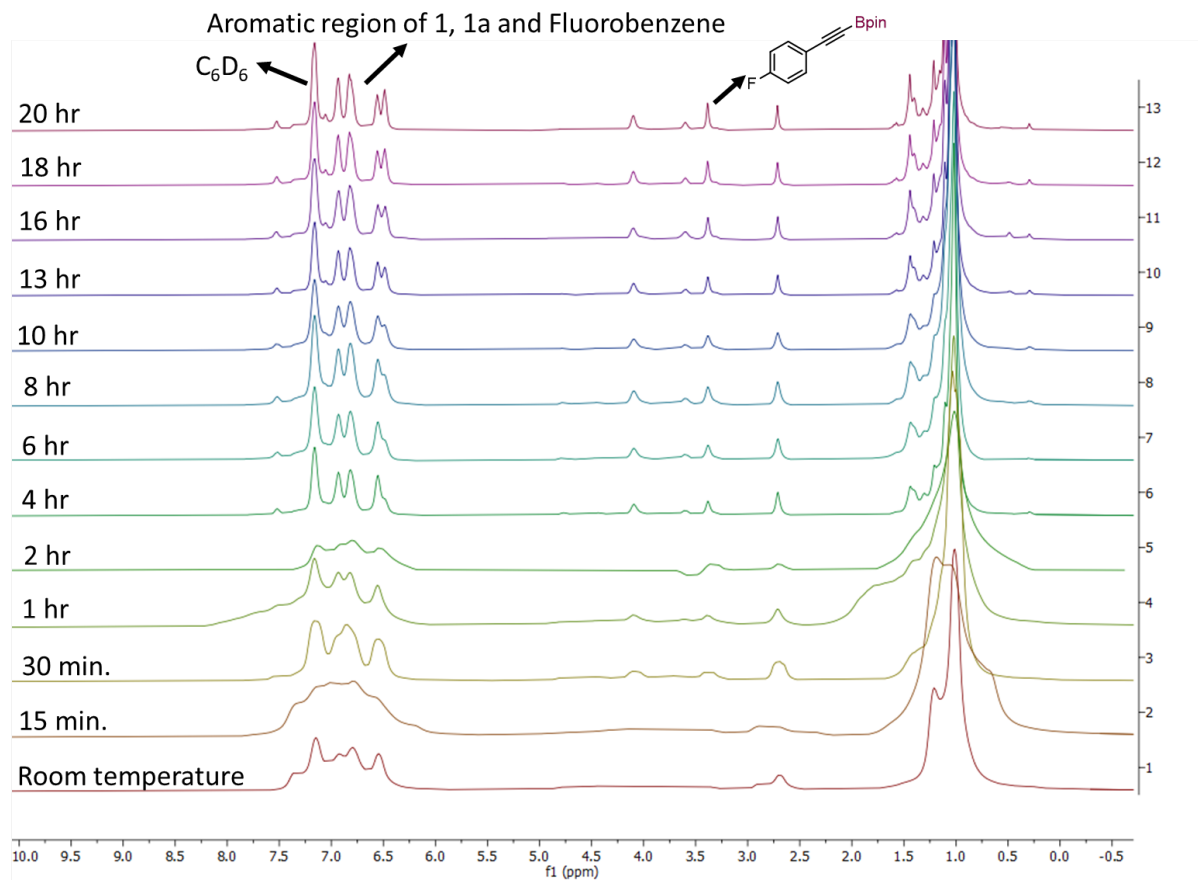

**Figure S8:**  $^1H$  NMR spectra of catalytic reaction in  $C_6D_6$  at 80 °C.

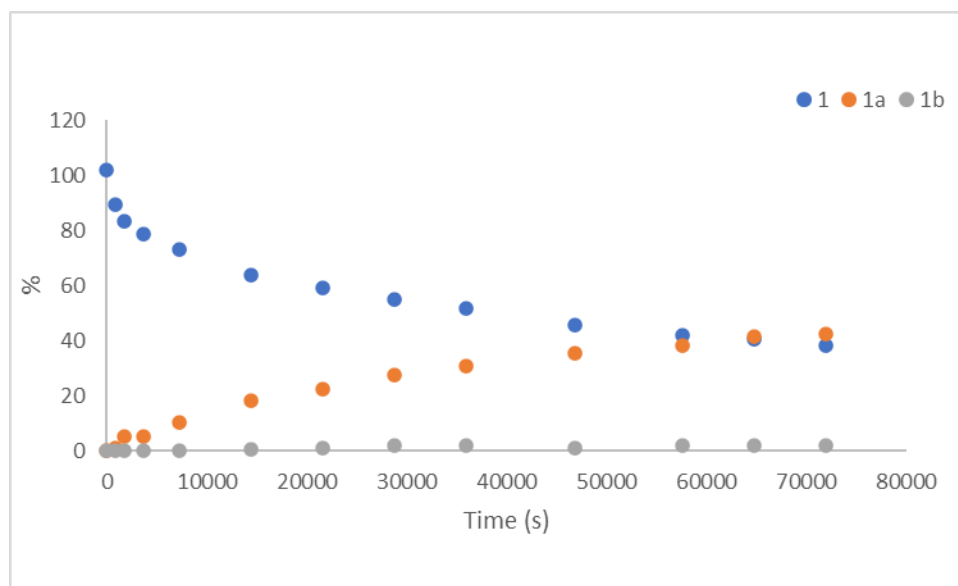

**Figure S9:** Quantitative reaction profile for the catalytic reaction in  $C_6D_6$  at 80 °C.

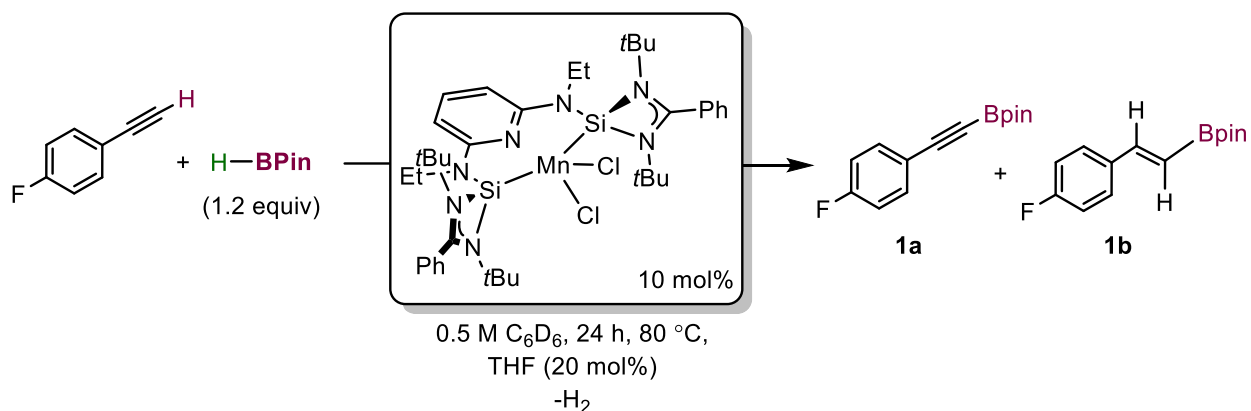

### 7.3 NMR monitoring of the C-H borylation of 4-fluorophenylacetylene with HBPIn at 80 °C employing 10 mol% of Mn1 as precatalyst in C<sub>6</sub>D<sub>6</sub> / 20 mol% of THF

4-Fluorophenylacetylene (20  $\mu$ L, 0.174 mmol) was added to a solution of **Mn1** (14 mg, 0.0174 mmol) in C<sub>6</sub>D<sub>6</sub> (0.30 mL) followed by the addition of HBPIn (30  $\mu$ L, 0.208 mmol), THF (3  $\mu$ L, 0.0348 mmol) and fluorobenzene (10  $\mu$ L, 0.106 mmol) as internal standard in a J. Young NMR tube in an argon filled glovebox. The tube was sealed and brought out of the glovebox. The headspace was evacuated by a freeze-pump-thaw cycle. The reaction was monitored by <sup>1</sup>H, <sup>11</sup>B and <sup>19</sup>F NMR spectroscopy at 80 °C for 24 hours (see Figures S10, S11 and S12). No signals attributable to diamagnetic manganese species were observed in the NMR spectra, however, signals attributable to the C-H borylation product (**1a**) were identified in the <sup>11</sup>B and <sup>19</sup>F NMR spectra and their intensity grew over time at the expense of those of the starting material.

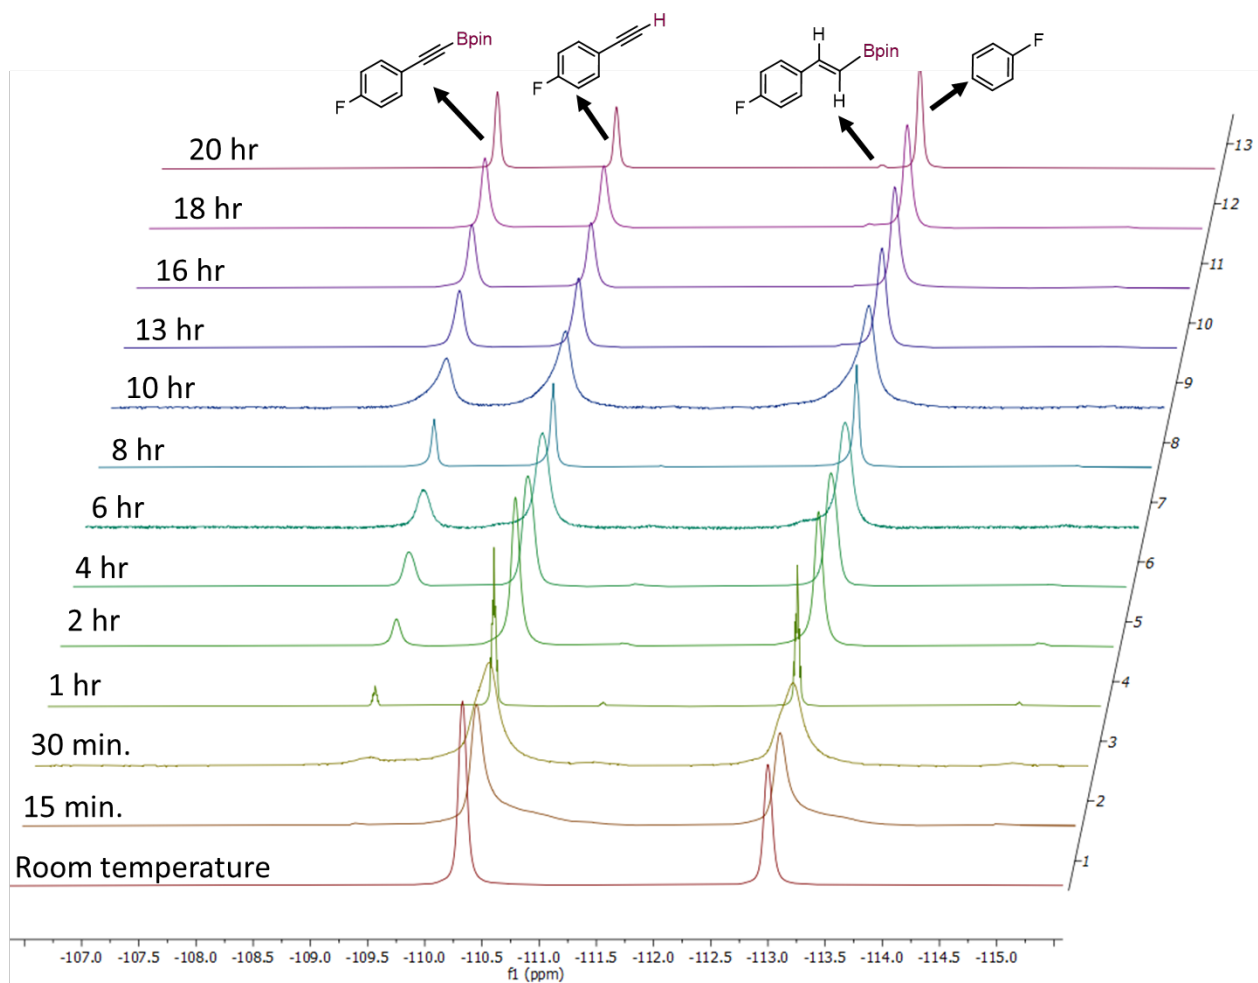

**Figure S10:**  $^{19}\text{F}$  NMR spectra of catalytic reaction in  $\text{C}_6\text{D}_6$  at  $80^\circ\text{C}$ .



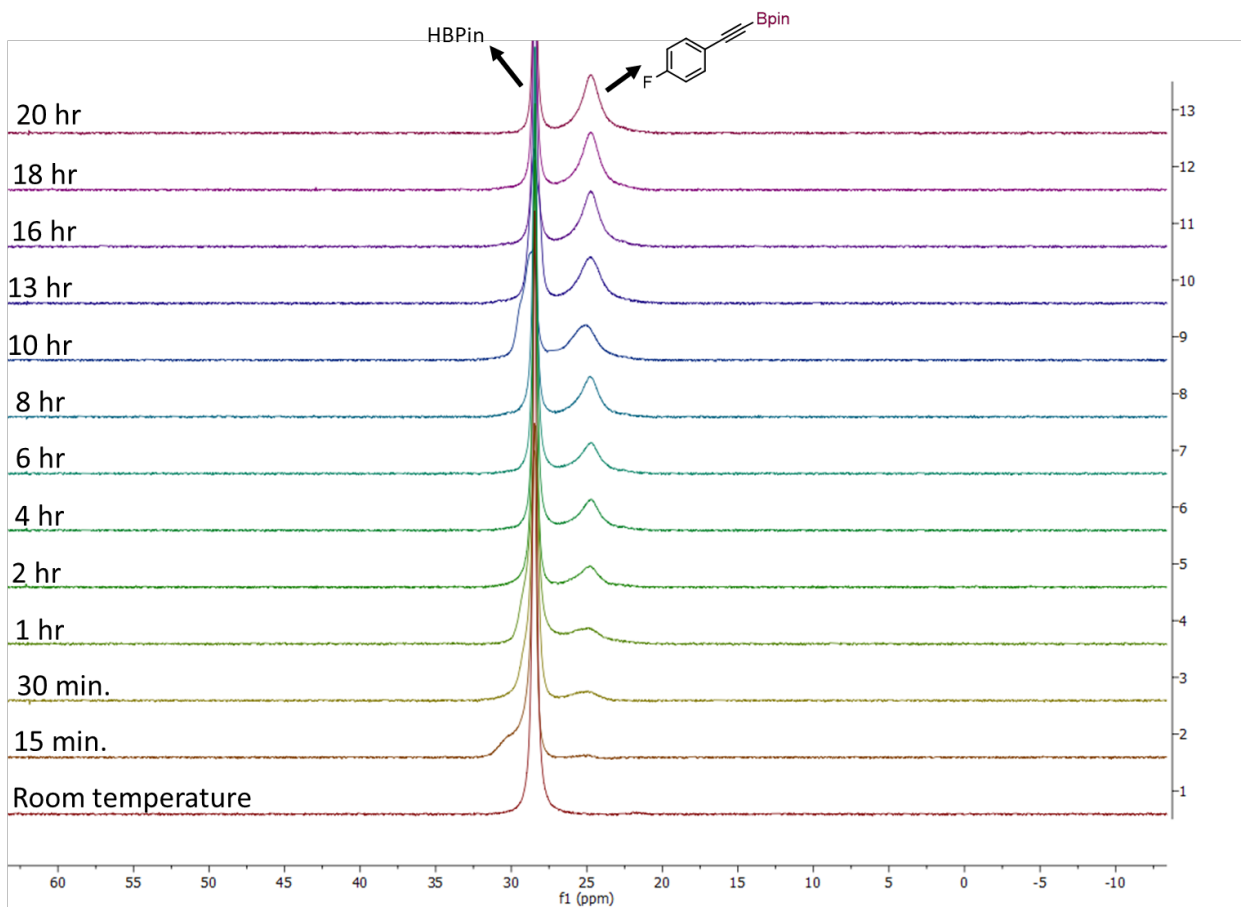

**Figure S11:**  $^{11}\text{B}$  NMR spectra of catalytic reaction in  $\text{C}_6\text{D}_6$  / 20 mol% of THF at 80 °C.

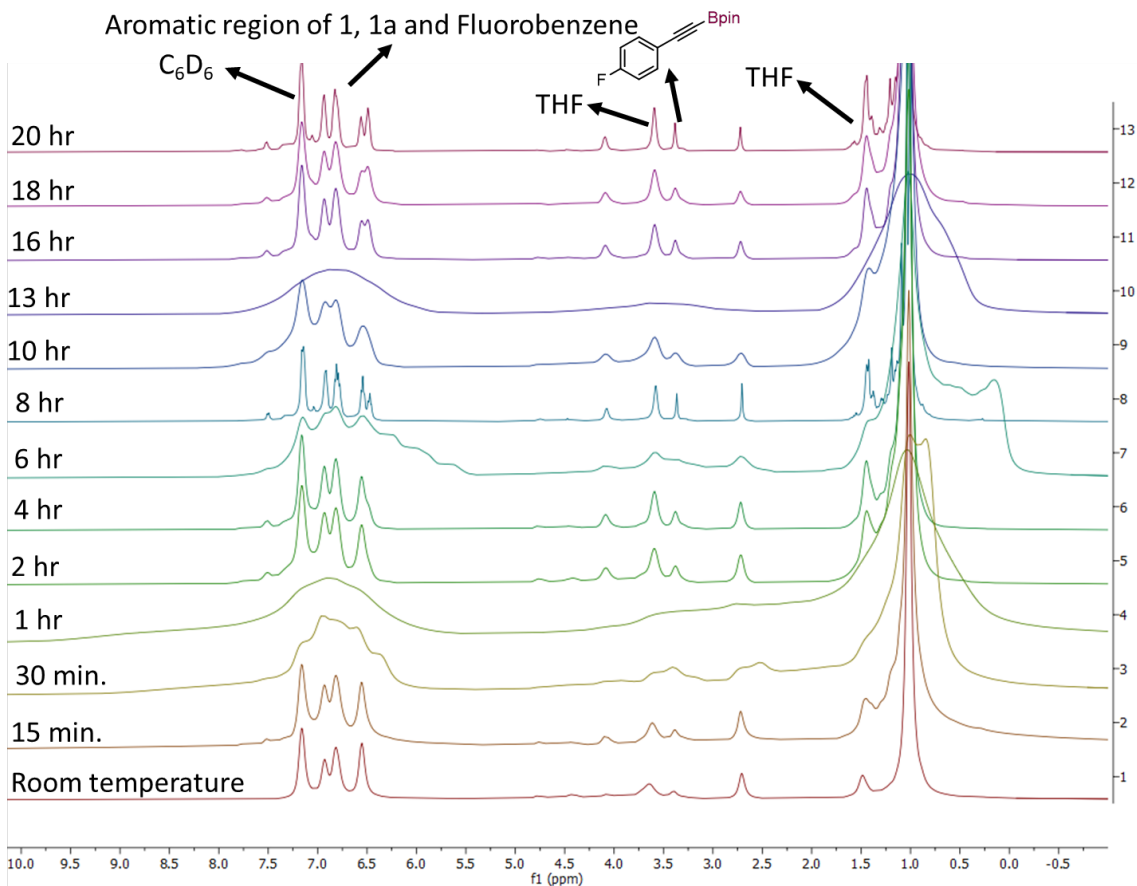

**Figure S12:**  $^1\text{H}$  NMR spectra of catalytic reaction in  $\text{C}_6\text{D}_6$  / 20 mol% of THF at 80 °C.

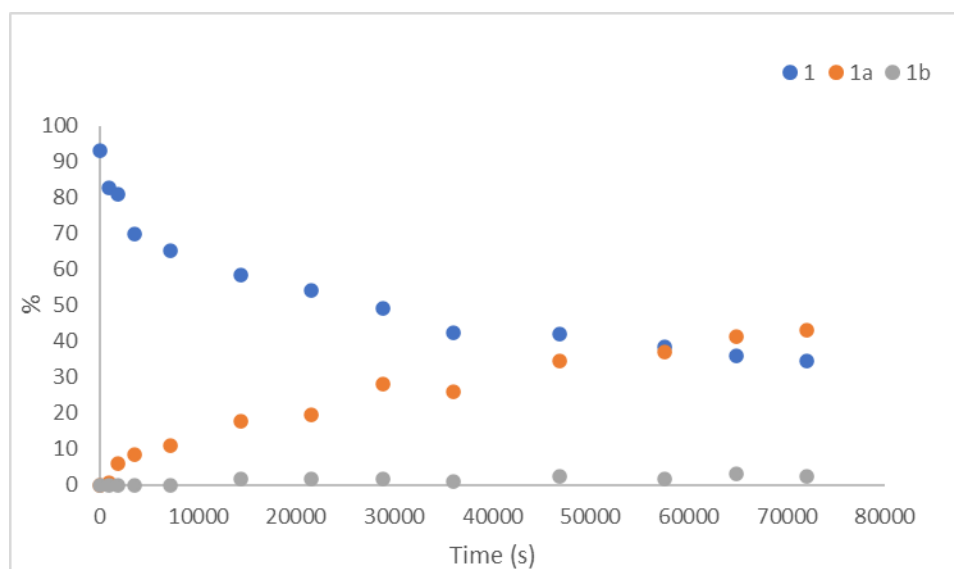

**Figure S13:** Quantitative reaction profile for the catalytic reaction in  $\text{C}_6\text{D}_6$  / 20 mol% of THF at 80 °C.

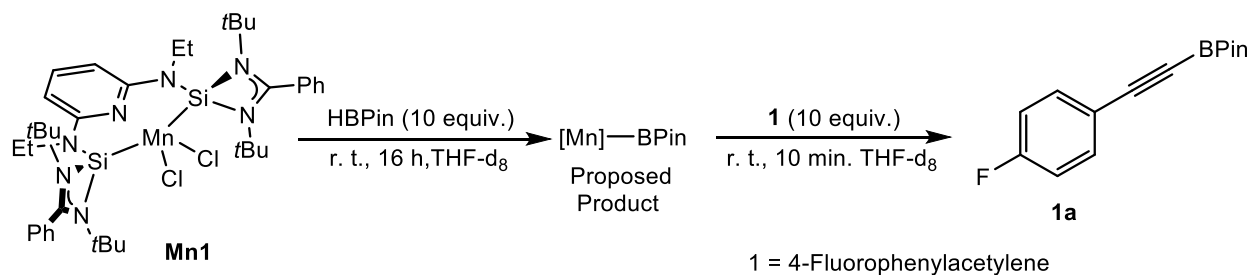

**7.4 NMR monitoring of the reaction of Mn1 with HBPi at room temperature followed by addition of 4-fluorophenylacetylene.** HBPi (35  $\mu\text{L}$ , 0.24 mmol) was added to a solution of **Mn1** (20 mg, 0.024 mmol) in THF- $\text{d}_8$  (0.35 mL) in a J. Young NMR tube in an argon filled glovebox. The tube was sealed and brought out of the glovebox. The reaction was monitored by  $^1\text{H}$  and  $^{11}\text{B}$  NMR spectroscopy at room temperature for 16 hours. After this time, the tube was brought into the glovebox, 4-fluorophenylacetylene (27  $\mu\text{L}$ , 0.24 mmol) was added at room temperature and the  $^1\text{H}$ ,  $^{11}\text{B}$  and  $^{19}\text{F}$  NMR spectra were registered at room temperature after 10 min. The resulting mixture was heated up to 80  $^\circ\text{C}$  for 1.5 hours and the reaction was monitored by  $^1\text{H}$ ,  $^{19}\text{F}$  and  $^{11}\text{B}$  NMR spectroscopy.

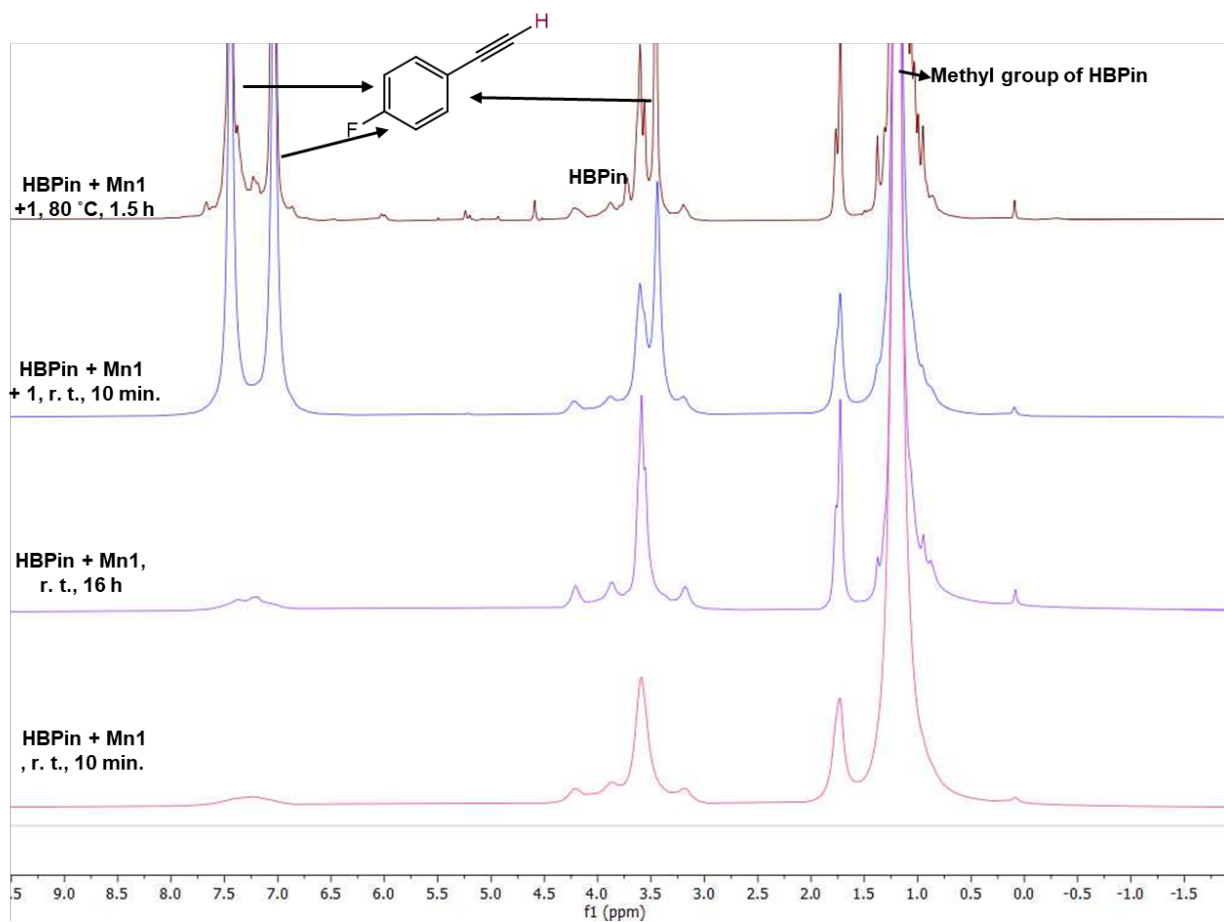

**Figure S14:**  $^1\text{H}$  NMR spectra of stoichiometric reaction of **Mn1** with HBPIn in  $\text{THF-d}_8$  followed by addition of **1**.

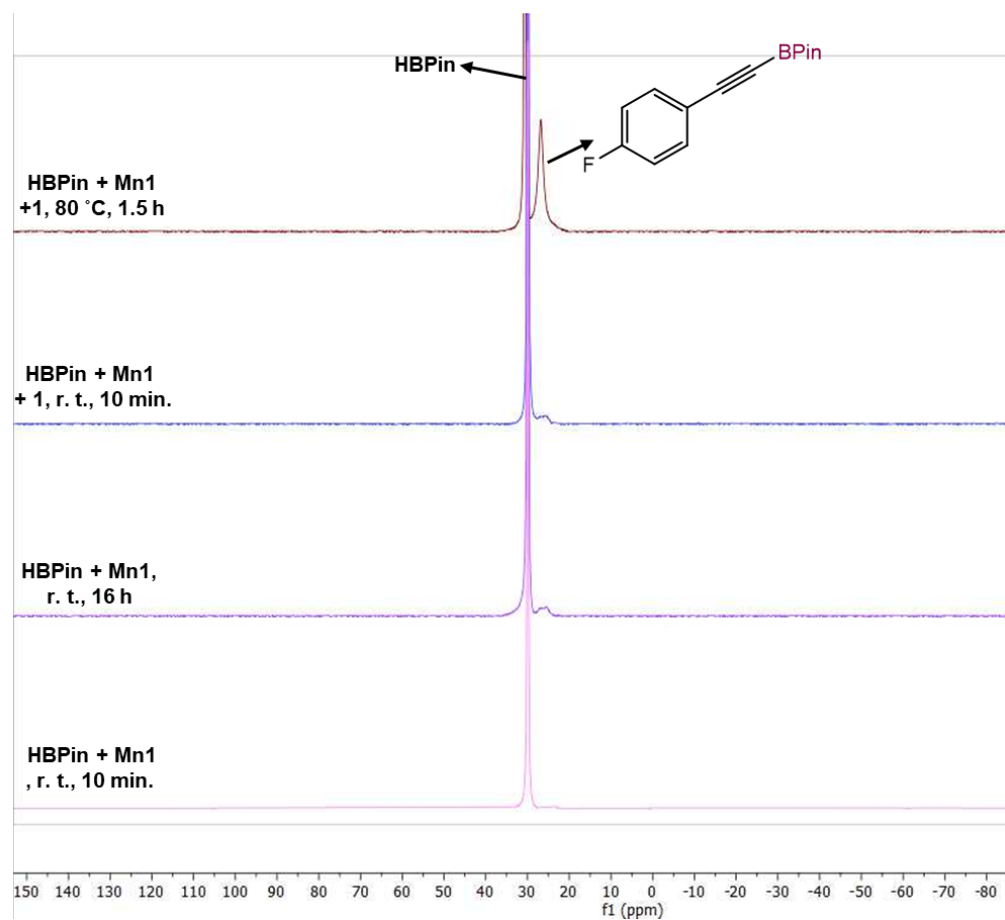

**Figure S15:**  $^{11}\text{B}$  NMR spectra of stoichiometric reaction of **Mn1** with HBPIn in THF- $\text{d}_8$ , followed by addition of **1**.

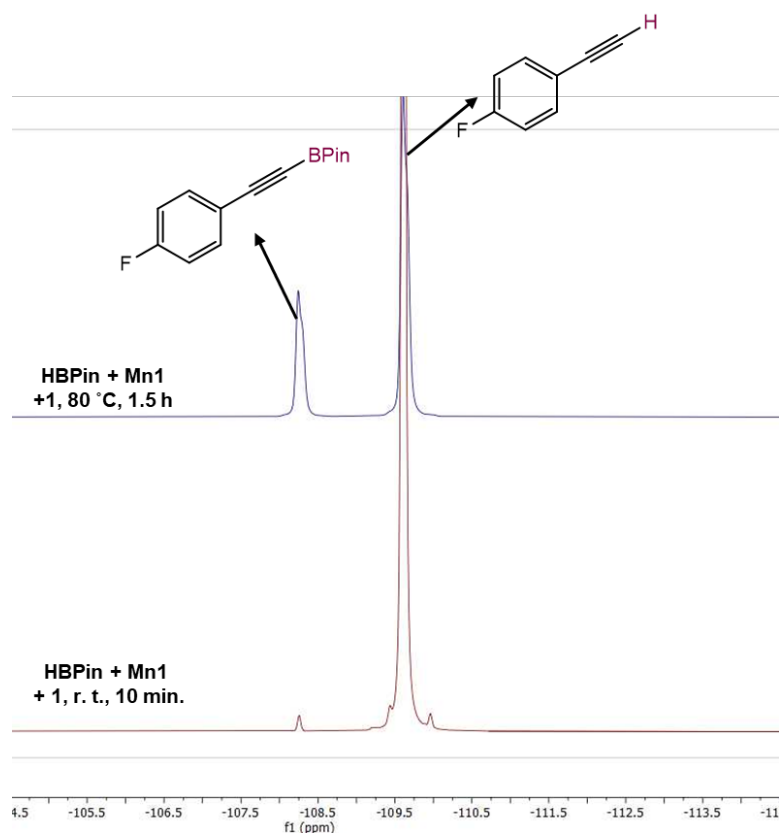

**Figure S16:**  $^{19}\text{F}$  NMR spectra of stoichiometric reaction of Mn1 with HBPIn in THF- $\text{D}_8$ , followed by addition of **1**.

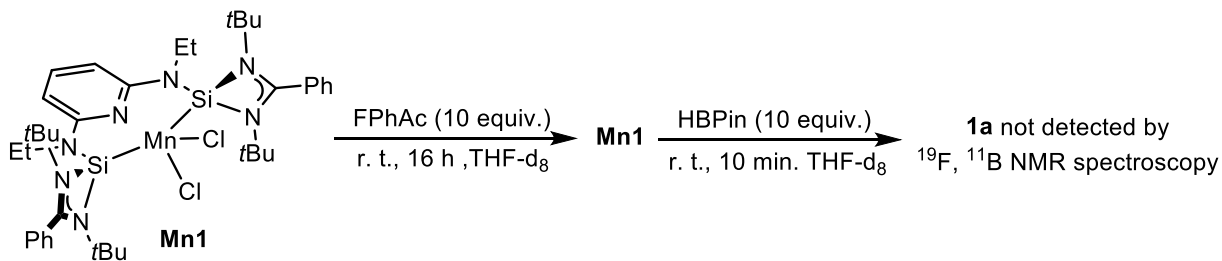

FPhAc = 4-Fluorophenylacetylene

**7.5 NMR monitoring of the reaction of Mn1 with 4-fluorophenylacetylene at room temperature followed by addition of HBPIn.** 4-fluorophenylacetylene (27  $\mu\text{L}$ , 0.24 mmol) was added to a solution of **Mn1** (20 mg, 0.024 mmol) in THF- $\text{d}_8$  (0.35 mL) in a J. Young NMR tube in an argon filled glovebox. The tube was sealed and brought out of the glovebox. The reaction was monitored by  $^1\text{H}$ ,  $^{11}\text{B}$  and  $^{19}\text{F}$  NMR spectroscopy at room temperature for 16 hours. After this time the tube was brought into the glovebox, HBPIn (35  $\mu\text{L}$ , 0.24 mmol) was added at room temperature and the  $^1\text{H}$ ,  $^{11}\text{B}$  and  $^{19}\text{F}$  NMR spectra were registered at room temperature. The

resulting mixture was heated up to 80 °C for 1.5 hours and the reaction was monitored by  $^1\text{H}$ ,  $^{19}\text{F}$  and  $^{11}\text{B}$  NMR spectroscopy.

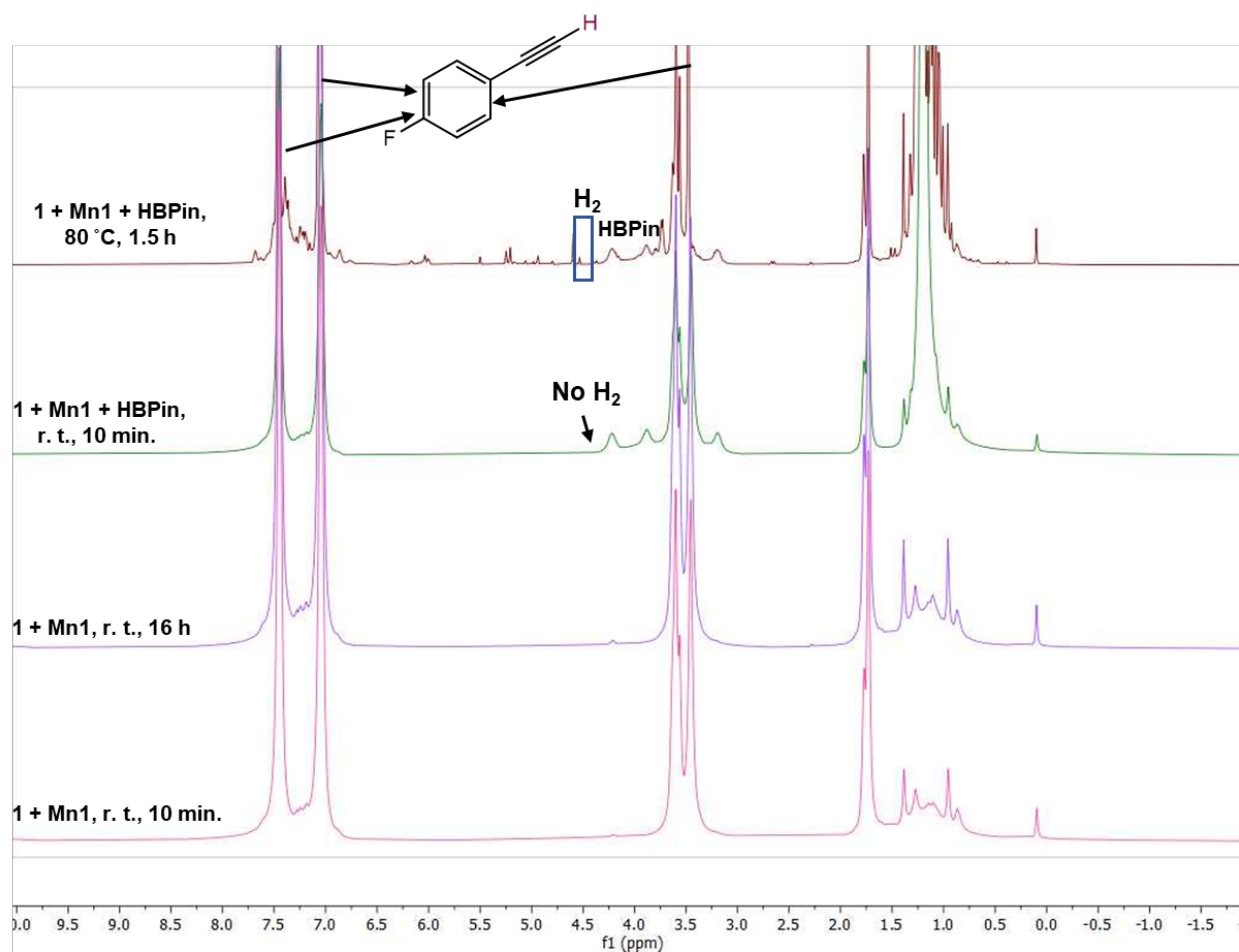

**Figure S17:**  $^1\text{H}$  NMR spectra of stoichiometric reaction of Mn1 with 4-fluorophenylacetylene in  $\text{THF-d}_8$ , followed by addition of HBPIn.

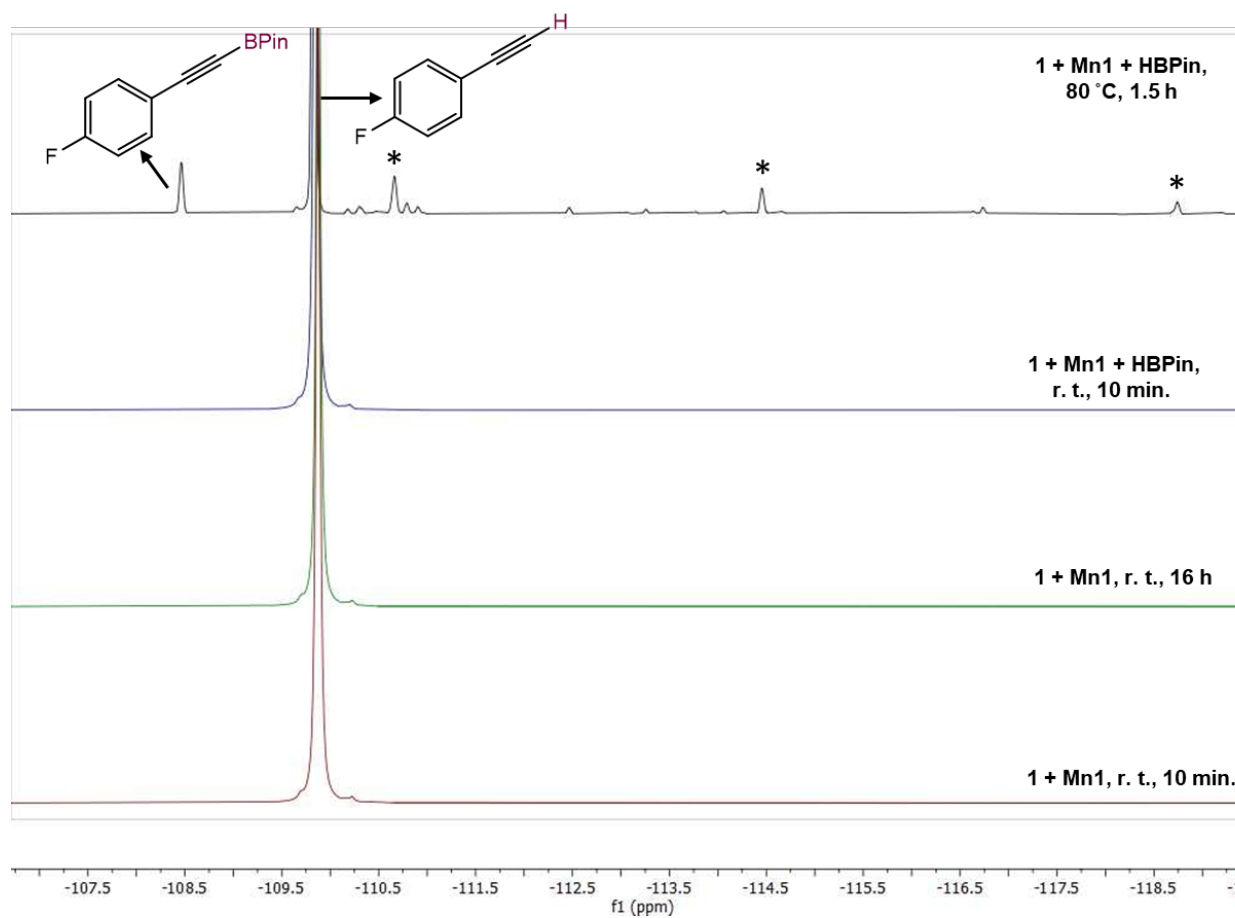

**Figure S18:**  $^{19}\text{F}$  NMR spectra of stoichiometric reaction of Mn1 with 4-fluorophenylacetylene in  $\text{THF-d}_8$ , followed by addition of HBPIn. (\* = unidentified products)



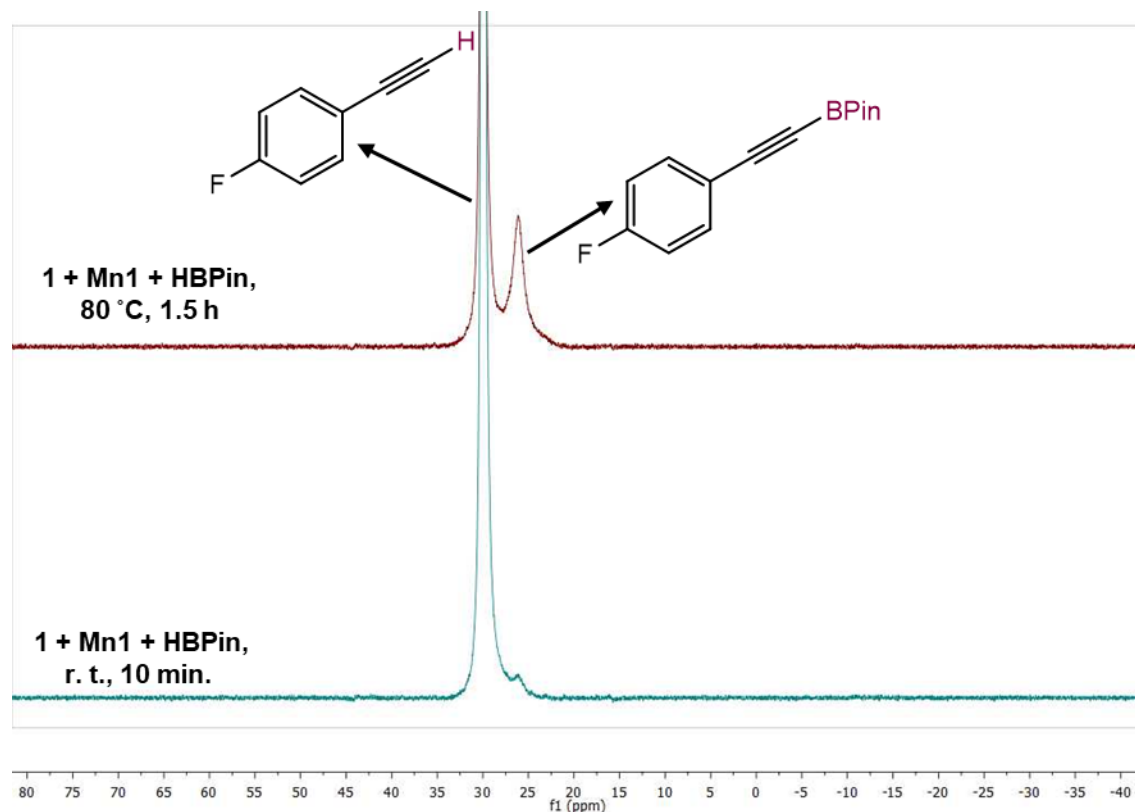

**Figure S19:**  $^{11}\text{B}$  NMR spectra of stoichiometric reaction of Mn1 with 4-fluorophenylacetylene in  $\text{THF-d}_8$ , followed by addition of HBPIn.

## 8. Stoichiometric Reactions of Mn1.

### 8.1 Reaction of Mn1 with HBPIn to yield Mn5.

In an argon-filled glovebox a J. Young flask was charged with a magnetic stir bar, **Mn1** (70 mg, 0.087 mmol), THF (2.5 mL) and HBPIn (125  $\mu\text{L}$ , 0.87 mmol). The reaction mixture was stirred for 16 h at room temperature. After the completion of the reaction, the reaction mixture was passed through a plug of Whatman filter paper in a Pasteur pipette and solvent was removed under vacuo to obtain orange oil. The product was extracted in hexane and solvent was removed under vacuum to obtain orange oil which was then analyzed by IR spectroscopy.

### IR spectra of the stoichiometric reaction of Mn1 and HBPIn:

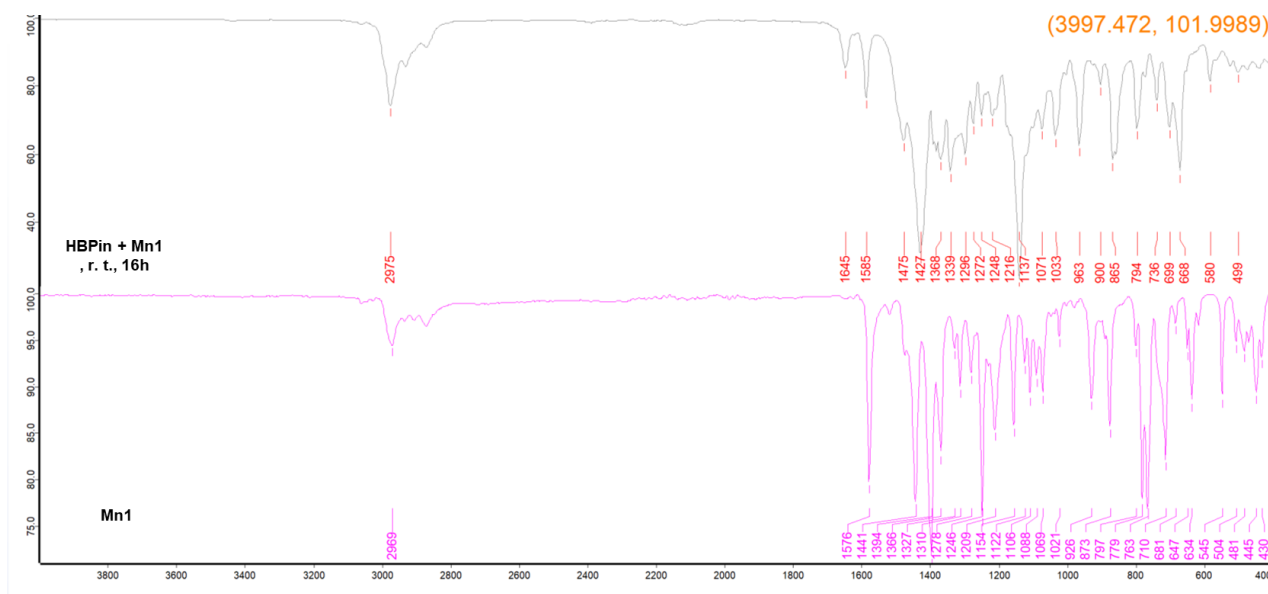

**Figure S20:** Stacked IR spectra of isolated product (top) and **Mn1**(bottom) and obtained from reaction 8.1.

IR of Reaction 8.1 (isolated product): 499(w), 580(w), 668(m), 699(w), 736(w), 794(w), 865(m), 900(w), 963(m), 1033(w), 1071(w), 1137(s), 1216(w), 1248(w), 1272(w), 1296(m), 1339(m), 1368(m), 1427(s), 1475(w), 1585(w), 1645(w), 2975(w).

IR of **Mn1**: 430(w), 445(m), 481(w), 504(w), 545(m), 634(m), 647(w), 681(s), 710(s), 763(s), 779(w), 797(m), 873(m), 926(m), 1021(w), 1069(w), 1088(w), 1106(w), 1122(w), 1154(m), 1209(m), 1246(s), 1278(w), 1310(w), 1327(w), 1366(m), 1394(s), 1441(s), 1576(s), 2969(w).

The spectroscopic data matched that of previously reported.<sup>4</sup>

### 8.2 NMR monitoring of the reaction of Mn1 with HBPIn at room temperature for detecting formation of CIBPin:

In an argon-filled glovebox, a scintillation vial was charged with a solution of Mn1 (20 mg, 0.025 mmol) in 0.35ml THF- $d_8$ . To this solution HBPIn (7.25  $\mu$ L, 0.05 mmol) was added and the contents were stirred until a clear solution was formed and then transferred to a J. Young NMR tube. The reaction was monitored by  $^1\text{H}$ ,  $^{11}\text{B}$  and  $^{13}\text{C}$  NMR spectroscopy at room temperature for 48 hours.

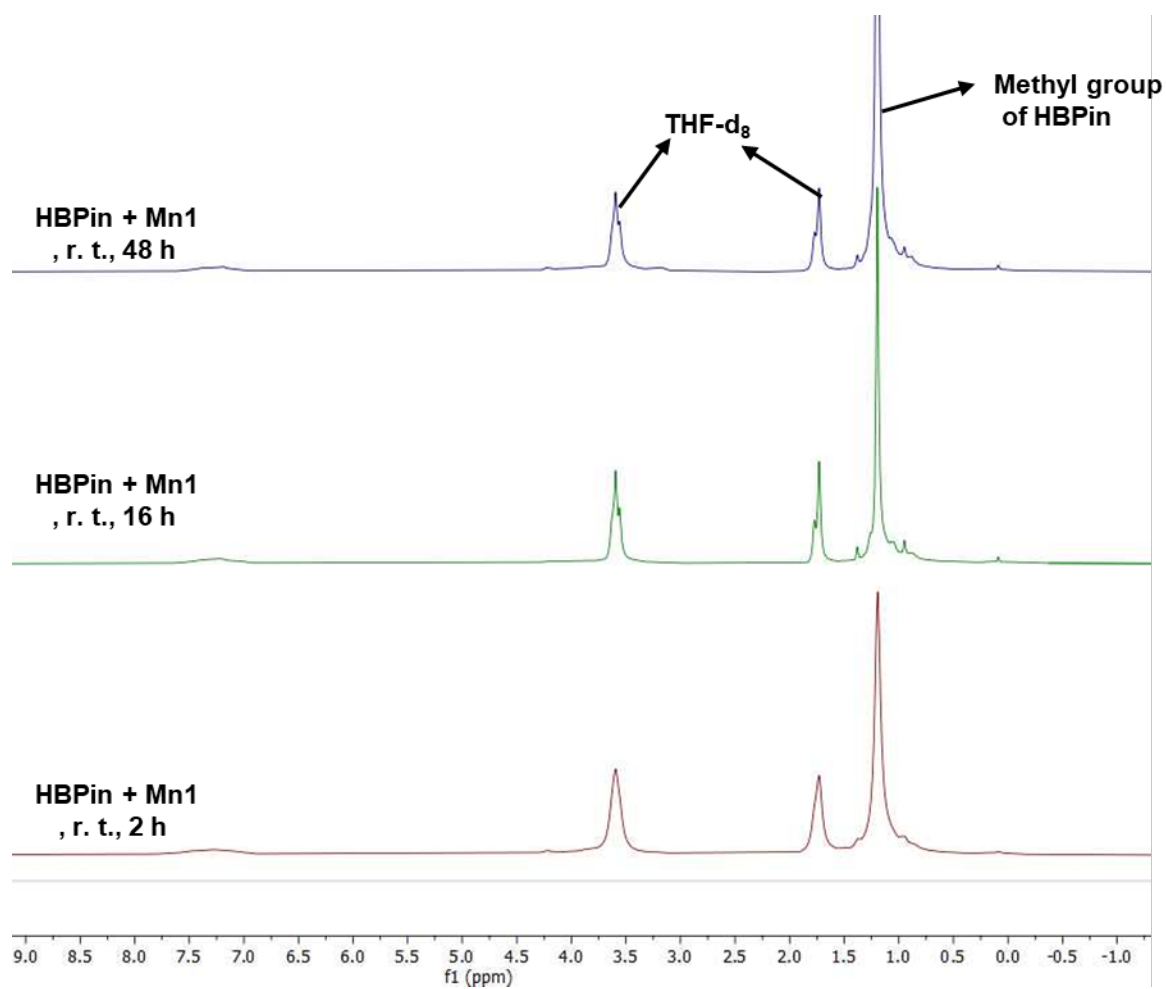

**Figure S21:**  $^1\text{H}$  NMR spectra of reaction of **Mn1** with HBPIn in  $\text{THF-d}_8$ .

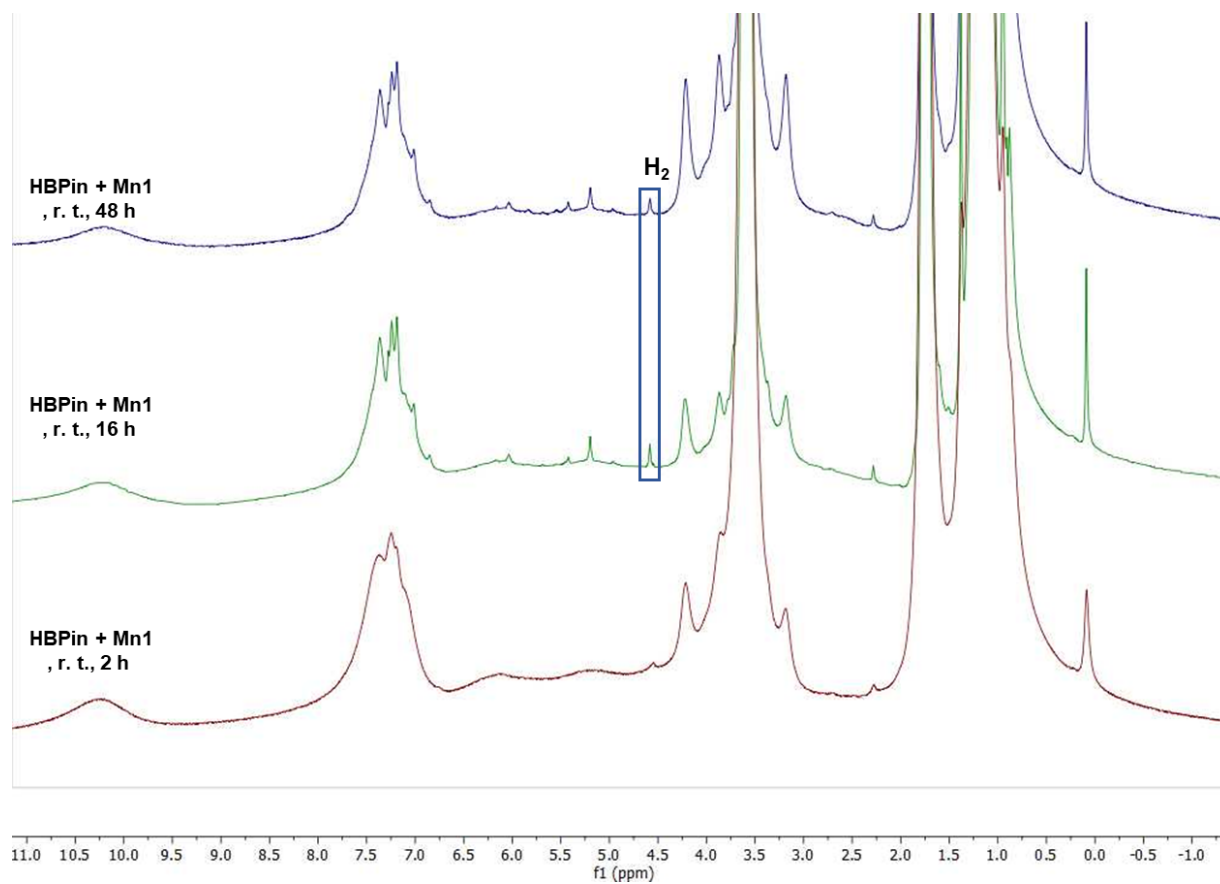

**Figure S22:**  $^1\text{H}$  NMR spectra of reaction of **Mn1** with HBPIn in  $\text{THF-d}_8$ , highlighting the formation of  $\text{H}_2$ .  $\text{H}_2$  is formed due to formation of  $\text{B}_2\text{Pin}_2$  from HBPIn, in the presence of **Mn1** (also confirmed from GC).

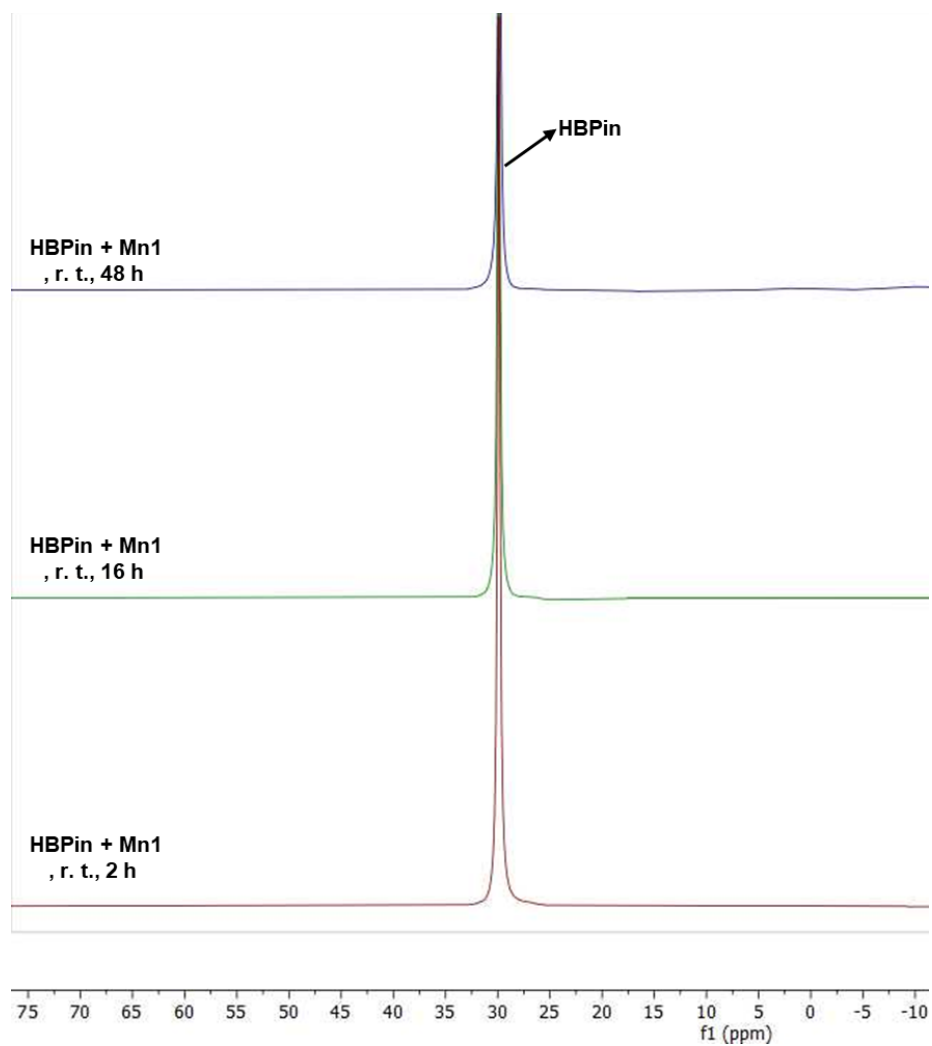

**Figure S23:**  $^{11}\text{B}$  NMR spectra of reaction of **Mn1** with HBPin in  $\text{THF-d}_8$ .

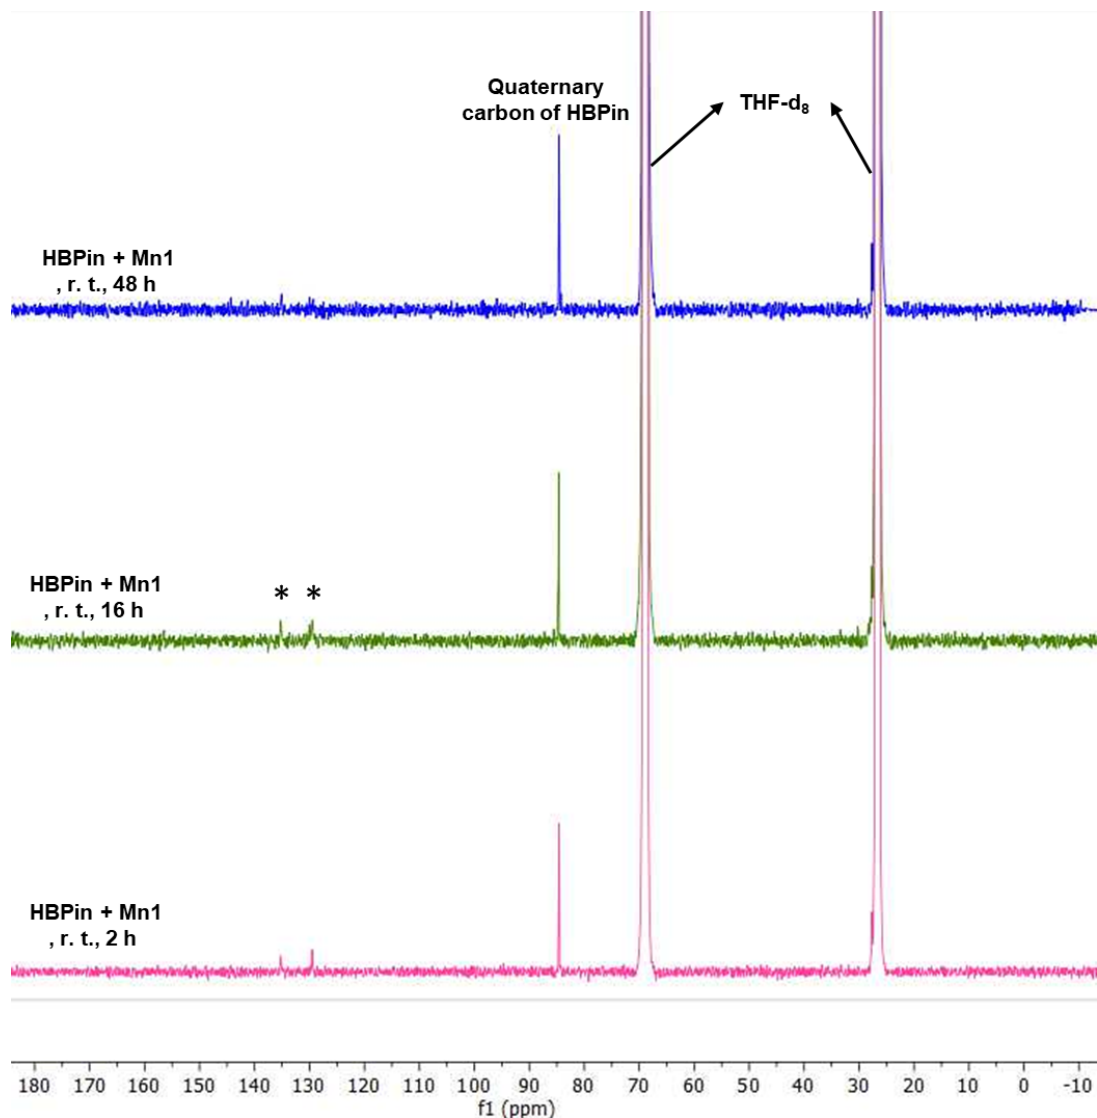

**Figure S24:**  $^{13}\text{C}$  NMR spectra of reaction of **Mn1** with HBPIn in  $\text{THF-d}_8$ . (\* = unidentified products).

Note: No formation of CIBPin was detected.

**8.3 Reaction of Mn5 with  $\text{CCl}_4$ .** In an argon-filled glovebox a J. Young flask was charged with a magnetic stir bar, crude **Mn5** (obtained starting from 100 mg, 0.123 mmol of **Mn1** and 18  $\mu\text{L}$ , 0.12 mmol of HBPIn), THF (1.0 mL) and  $\text{CCl}_4$  (20  $\mu\text{L}$ , 0.206 mmol). The tube was sealed, and the resulting mixture was stirred at r.t. for 30 minutes. The resulting solution was exposed to air, passed through a plug of Celite in a Pasteur pipette and analyzed by  $^1\text{H}$  NMR spectroscopy.

**8.4 Reaction of Mn1 with 1 at room temperature.** In an argon filled glove box, a 20 mL scintillation vial was charged with a magnetic stir bar, **Mn1** (50 mg, 0.062 mmol), THF (1.5 mL)

and 4-fluorophenylacetylene (71  $\mu$ L, 0.62 mmol). The reaction mixture was stirred for 16 hours at room temperature. After the completion of the reaction, the reaction mixture was passed through a plug of Whatman filter paper in a Pasteur pipette, layered with hexane and kept in the freezer. After 4 days, the precipitated yellow solid from the reaction was separated.

#### IR spectra of the stoichiometric reaction 8.4 and comparison to Mn1.

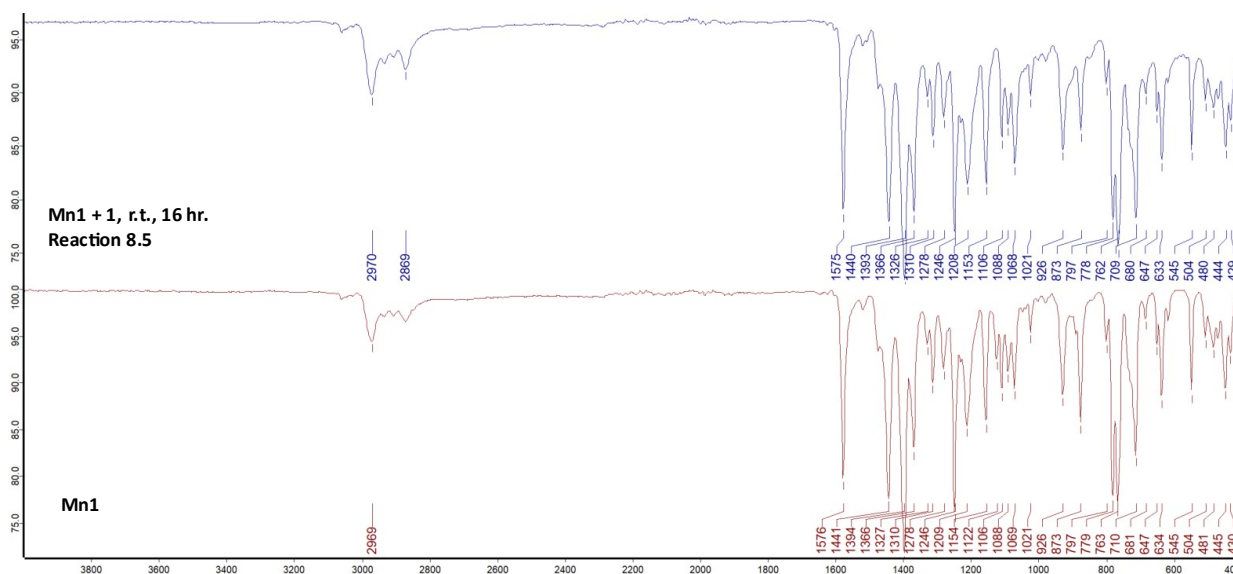

**Figure S25:** Stacked IR spectra of **Mn1** and isolated solid (bottom) from reaction 8.4 (top).

IR of **Mn1**: 430(w), 445(m), 481(w), 504(w), 545(m), 634(m), 647(w), 681(m), 710(s), 763(s), 779(s), 797(w), 873(m), 926(m), 1021(w), 1069(m), 1088(m), 1106(m), 1122(w), 1154(m), 1209(m), 1246(s), 1278(w), 1310(m), 1327(m), 1366(m), 1394(s), 1441(s), 1576(s), 2869(w), 2969(m).

The spectroscopic data matched that previously reported.<sup>4</sup>

IR of Reaction 8.4 (isolated solid): 429(w), 444(m), 480(w), 504(w), 545(m), 633(m), 647(w), 680(w), 709(s), 762(s), 778(s), 797(w), 873(m), 926(m), 1021(w), 1068(m), 1088(m), 1106(m), 1153(m), 1208(m), 1246(s), 1278(m), 1310(m), 1326(w), 1366(s), 1393(s), 1440(s), 1575(s), 2869(w), 2970(m).

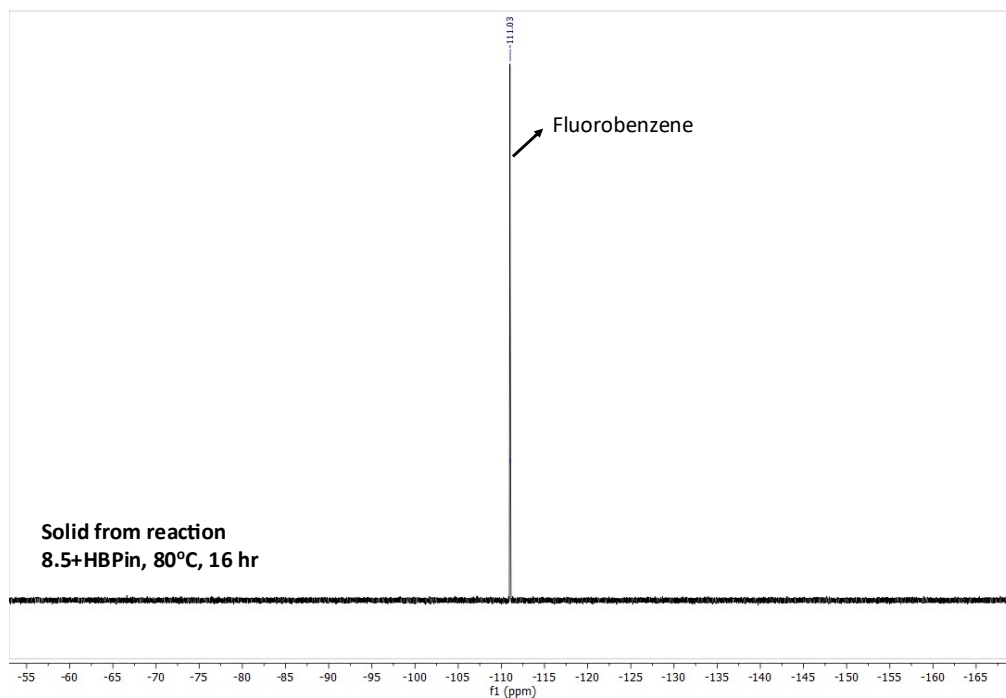

**Figure S26:**  $^{19}\text{F}$  NMR spectrum of solid from reaction 8.4 with HBPIn  
Peak at -111.03 ppm corresponds to internal standard (fluorobenzene).

## 9. Kinetic Isotope Effect (KIE) determination

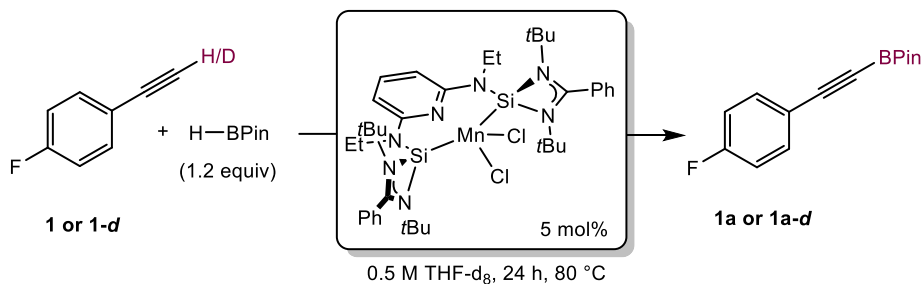

### KIE Determination for the C-H borylation of 4-fluorophenylacetylene and 4-fluorophenylacetylene- $\text{d}$ using Mn1 as the Catalyst (2 Separate Vessels)

In an argon-filled glovebox, a scintillation vial was charged with a solution of **Mn1** (7 mg, 0.008 mmol) in 0.35 mL THF- $\text{d}_8$ . To this solution, 4-fluorophenylacetylene (20  $\mu\text{L}$ , 0.174 mmol), fluorobenzene (10  $\mu\text{L}$ , 0.106 mmol) as the internal standard and HBPIn (30  $\mu\text{L}$ , 0.208 mmol) were added in the same order. The contents were stirred until a clear solution was formed and then transferred to a J. Young NMR tube. The tube was sealed and brought out of the glovebox. The headspace was evacuated by a freeze-pump-thaw cycle. A separate scintillation vial was charged with a solution of **Mn1** (7.03 mg, 0.008 mmol) in 0.35 mL THF- $\text{d}_8$ . To this solution, 4-



fluorophenylacetylene-*d* (19.1  $\mu\text{L}$ , 0.174 mmol), fluorobenzene (10  $\mu\text{L}$ , 0.106 mmol) as the internal standard and HBPIn (30  $\mu\text{L}$ , 0.208 mmol) were added in the same order. The contents were stirred until a clear solution was formed and then transferred to a J. Young NMR tube. The tube was sealed and brought out of the glovebox. The headspace was evacuated by a freeze-pump-thaw cycle. The reactions were monitored by  $^{19}\text{F}$  NMR spectroscopy at 80  $^{\circ}\text{C}$ . Integration of the signal for the internal standard, the starting material, and the product by  $^{19}\text{F}$  NMR spectroscopy afforded the quantitative data reported in Table S3. The KIE was determined using the initial rates method (up to 10% yield). The rates of the reactions,  $\text{rate}_{\text{H}}$  and  $\text{rate}_{\text{D}}$ , correspond to the rates of formation of product **1a** (2-((4-Fluorophenyl)ethynyl)-4,4,5,5-tetramethyl-1,3,2-dioxaborolane) using 4-fluorophenylacetylene and 4-fluorophenylacetylene-*d* as substrates respectively. The overall KIE was calculated by taking the average of the ratios of  $\text{rate}_{\text{H}}$  and  $\text{rate}_{\text{D}}$  for all the three runs (Table S3).

| Run        | Rate <sub>H</sub> (Ms <sup>-1</sup> ) | Rate <sub>D</sub> (Ms <sup>-1</sup> ) | KIE (K <sub>H</sub> /K <sub>D</sub> ) |
|------------|---------------------------------------|---------------------------------------|---------------------------------------|
| 1          | $8 \times 10^{-9}$                    | $7 \times 10^{-9}$                    | 1.14                                  |
| 2          | $7 \times 10^{-9}$                    | $6 \times 10^{-9}$                    | 1.16                                  |
| 3          | $8 \times 10^{-9}$                    | $7 \times 10^{-9}$                    | 1.14                                  |
| KIE = 1.15 |                                       |                                       |                                       |

**Table S4.** KIE values for the C-H activation of 4-fluorophenylacetylene and 4-fluorophenylacetylene-*d* using HBPIn, catalyzed by **Mn1** in THF-*d*<sub>8</sub> at 80  $^{\circ}\text{C}$ , using fluorobenzene as internal standard.

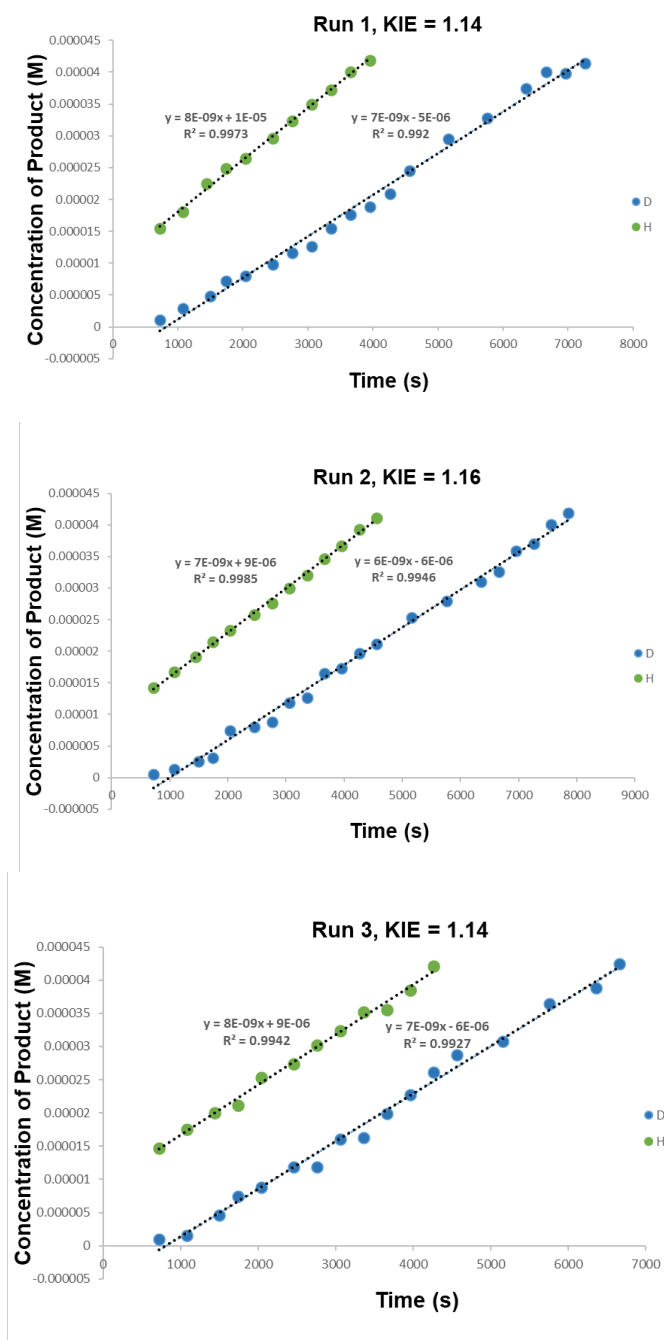

**Figure S27:** Plots of concentration of 2-((4-Fluorophenyl)ethynyl)-4,4,5,5-tetramethyl-1,3,2-dioxaborolane (M) vs. time (s) using 4-fluorophenylacetylene and 4-fluorophenylacetylene-*d* as substrates for runs 1-3 using **Mn1** as the precatalyst.

## 10. Reaction of **1** with HBPIn employing different Mn active species as catalysts

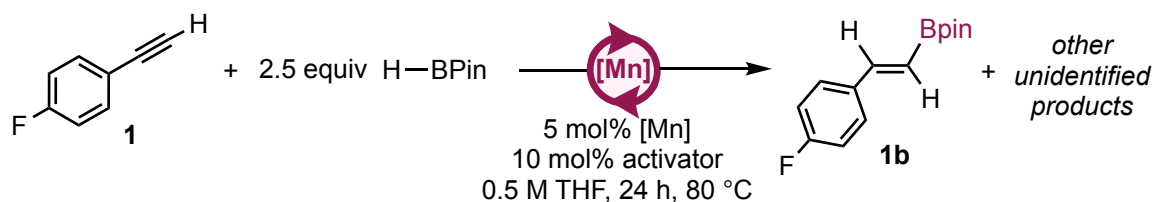

| Entry | [Mn]              | Activator<br>(10 mol%)                             | Conversion<br>(%) | Yield <b>1b</b><br>(%) |
|-------|-------------------|----------------------------------------------------|-------------------|------------------------|
| 1     | <b>Mn1</b>        | NH <sub>3</sub> BH <sub>3</sub>                    | >99               | 8                      |
| 2     | <b>Mn1</b>        | NH <sub>3</sub> BH <sub>3</sub><br>(Preactivation) | >99               | 50                     |
| 3     | <b>Mn1</b>        | KOtBu                                              | >99               | 9                      |
| 4     | <b>Mn1</b>        | NaHBET <sub>3</sub>                                | >99               | N. D.                  |
| 5     | <b>Mn1</b>        | NaHBET <sub>3</sub><br>(Preactivation)             | >99               | N. D.                  |
| 6     | [Mn(SiNSi)(dmpe)] | None                                               | >99               | 17                     |

**Table S5.** Conversion and yields for the reaction of **1** with HBPIn catalyzed by different Mn active species.

*Note: In none of the reactions the alkynylboronate ester **1a** was detected by <sup>19</sup>F NMR spectroscopy. Other unidentified products were formed and account for the observed 99% conversion of the starting material. N. D. = Not detected.*

### 10.1 Reaction of 1 with HBPIn employing Mn1 *in-situ* activated with NH<sub>3</sub>BH<sub>3</sub>

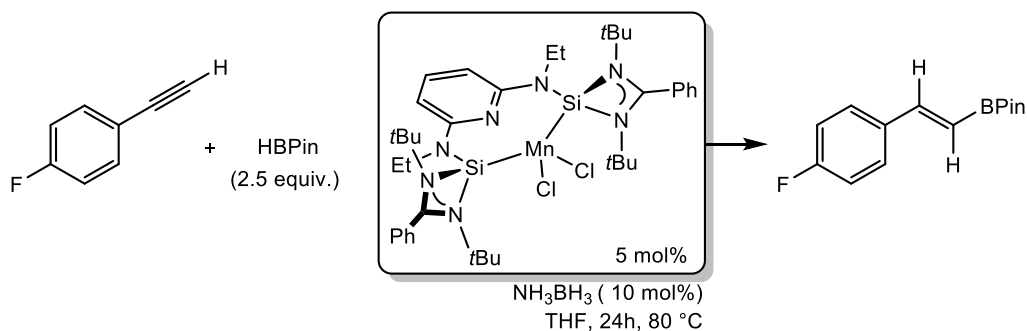

In an argon-filled glovebox a J. Young flask was charged with a magnetic stir bar and the reagents in the following order- **Mn1** (12 mg, 0.015 mmol), THF (0.46 mL), 4-Fluorophenylacetylene (34  $\mu$ L, 0.3 mmol), HBPIn (108  $\mu$ L, 0.75 mmol) and NH<sub>3</sub>BH<sub>3</sub> (0.93 mg, 0.030 mmol). The tube was sealed, and the resulting mixture was stirred at 80 °C for 24 hours. The reaction was brought into the glovebox and the crude reaction mixture was diluted with THF and passed through a plug of silica gel in a Pasteur pipette and then analyzed by <sup>19</sup>F NMR spectroscopy without additional purification. Conversion: >99%; Yield (**1b**): 8%.

### 10.2 Reaction of 1 with HBPIn employing Mn1 preactivated with NH<sub>3</sub>BH<sub>3</sub>

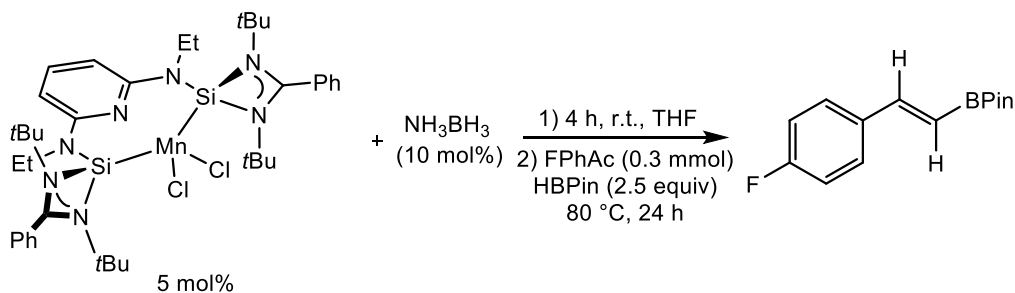

In an argon-filled glovebox a J. Young flask was charged with a magnetic stir bar, **Mn1** (12 mg, 0.015 mmol), THF (0.46 mL) and NH<sub>3</sub>BH<sub>3</sub> (0.93 mg, 0.030 mmol). The contents were stirred at room temperature for 4 h followed by the addition of 4-Fluorophenylacetylene (33  $\mu$ L, 0.3 mmol) and HBPIn (108  $\mu$ L, 0.36 mmol). The tube was sealed, and the resulting mixture was stirred at 80 °C for 24 hours. The reaction was brought into the glovebox and the crude reaction mixture was diluted with THF and passed through a plug of silica gel in a Pasteur pipette and then analyzed by <sup>19</sup>F NMR spectroscopy without additional purification. Conversion: >99%; Yield (**1b**): 50%.

### 10.3 Reaction of 1 with HBPIn employing Mn1 *in-situ* activated with KO<sup>t</sup>Bu

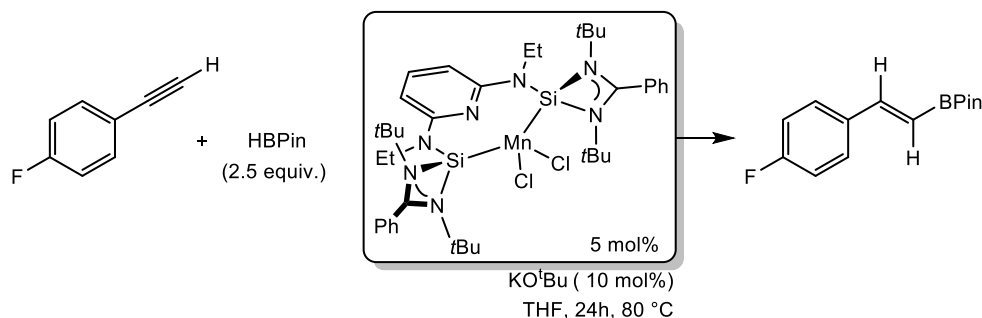

In an argon-filled glovebox a J. Young flask was charged with a magnetic stir bar and the reagents in the following order- **Mn1** (12 mg, 0.015 mmol), THF (0.43 mL), 4-Fluorophenylacetylene (34  $\mu$ L, 0.3 mmol), HBPIn (108  $\mu$ L, 0.75 mmol) and KO<sup>t</sup>Bu (30  $\mu$ L of a 1 M solution in THF, 0.030 mmol). The tube was sealed, and the resulting mixture was stirred at 80 °C for 24 hours. The reaction was brought into the glovebox and the crude reaction mixture was diluted with THF and passed through a plug of silica gel in a Pasteur pipette and then analyzed by <sup>19</sup>F NMR spectroscopy without additional purification. Conversion: >99%; Yield (**1b**): 9%.

### 10.4 Reaction of 1 with HBPIn employing Mn1 *in-situ* activated with NaHBET<sub>3</sub>

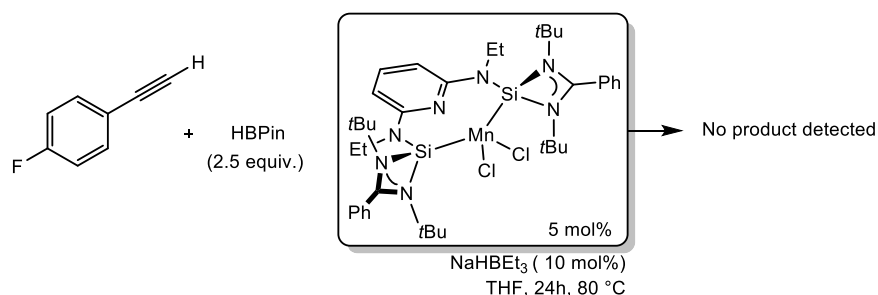

In an argon-filled glovebox a J. Young flask was charged with a magnetic stir bar and the reagents in the following order- **Mn1** (12 mg, 0.015 mmol), THF (0.43 mL), 4-Fluorophenylacetylene (33  $\mu$ L, 0.3 mmol), HBPIn (108  $\mu$ L, 0.36 mmol) and NaHBET<sub>3</sub> (30  $\mu$ L of a 1 M solution in THF, 0.030 mmol). The tube was sealed, and the resulting mixture was stirred at 80 °C for 24 hours. The reaction was brought into the glovebox and the crude reaction mixture was diluted with THF and passed through a plug of silica gel in a Pasteur pipette and then

analyzed by  $^{19}\text{F}$  NMR spectroscopy without additional purification. Conversion: >99%; Yield (**1b**): Not detected.

### 10.5 Reaction of **1** with HBPIn employing Mn1 preactivated with $\text{NaBHEt}_3$

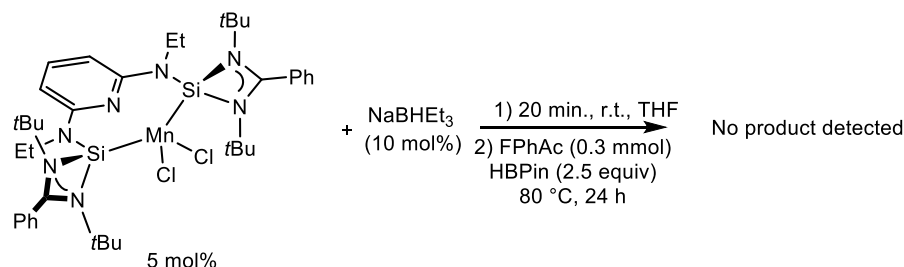

In an argon-filled glovebox a J. Young flask was charged with a magnetic stir bar, **Mn1** (12 mg, 0.015 mmol), THF (0.43 mL) and  $\text{NaBHEt}_3$  (30  $\mu\text{L}$  of a 1 M solution in THF, 0.030 mmol). The contents were stirred at room temperature for 20 min. followed by the addition of 4-Fluorophenylacetylene (33  $\mu\text{L}$ , 0.3 mmol) and HBPIn (108  $\mu\text{L}$ , 0.36 mmol). The tube was sealed, and the resulting mixture was stirred at 80 °C for 24 hours. The reaction was brought into the glovebox and the crude reaction mixture was diluted with THF and passed through a plug of silica gel in a Pasteur pipette and then analyzed by  $^{19}\text{F}$  NMR spectroscopy without additional purification. Conversion: >99%; Yield (**1b**): Not detected.

### 10.6 Reaction of **1** with HBPIn employing 5 mol% of $[\text{Mn}(\text{SiNSi})(\text{dmpe})]$ as precatalyst

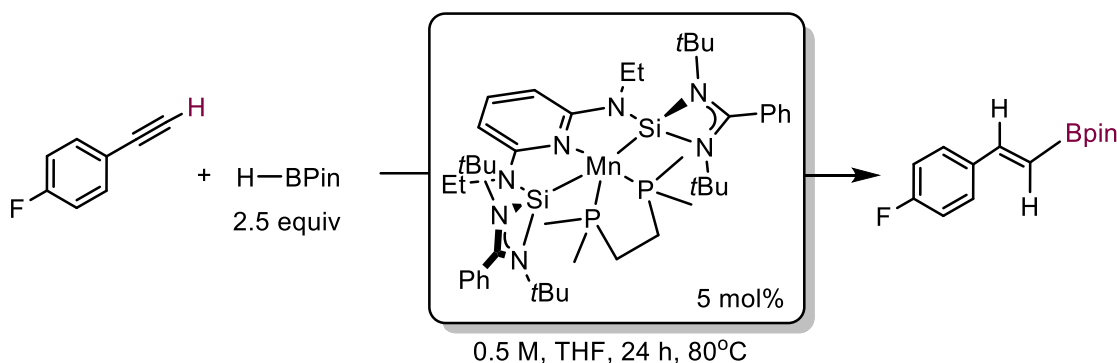

In an argon-filled glovebox a J. Young flask was charged with a magnetic stir bar, 4-fluorophenylacetylene (34  $\mu\text{L}$ , 0.3 mmol), THF (0.52 mL), HBPIn (108  $\mu\text{L}$ , 0.75 mmol) and  $[\text{Mn}(\text{SiNSi})(\text{dmpe})]$  (13 mg, 0.015 mmol). The tube was sealed, and the resulting mixture was stirred at 80 °C for 24 hours. The reaction was brought into the glovebox and fluorobenzene (10  $\mu\text{L}$ , 0.106 mmol) was added as an internal standard. The crude reaction mixture was passed

through a plug of whatman filter paper in a Pasteur pipette and then analyzed by GC chromatography and NMR spectroscopy without additional purification. Conversion: >99%; Yield (**1b**): 17%.

## 11. Spectroscopic Data

### NMR spectra of alkynylboronate esters

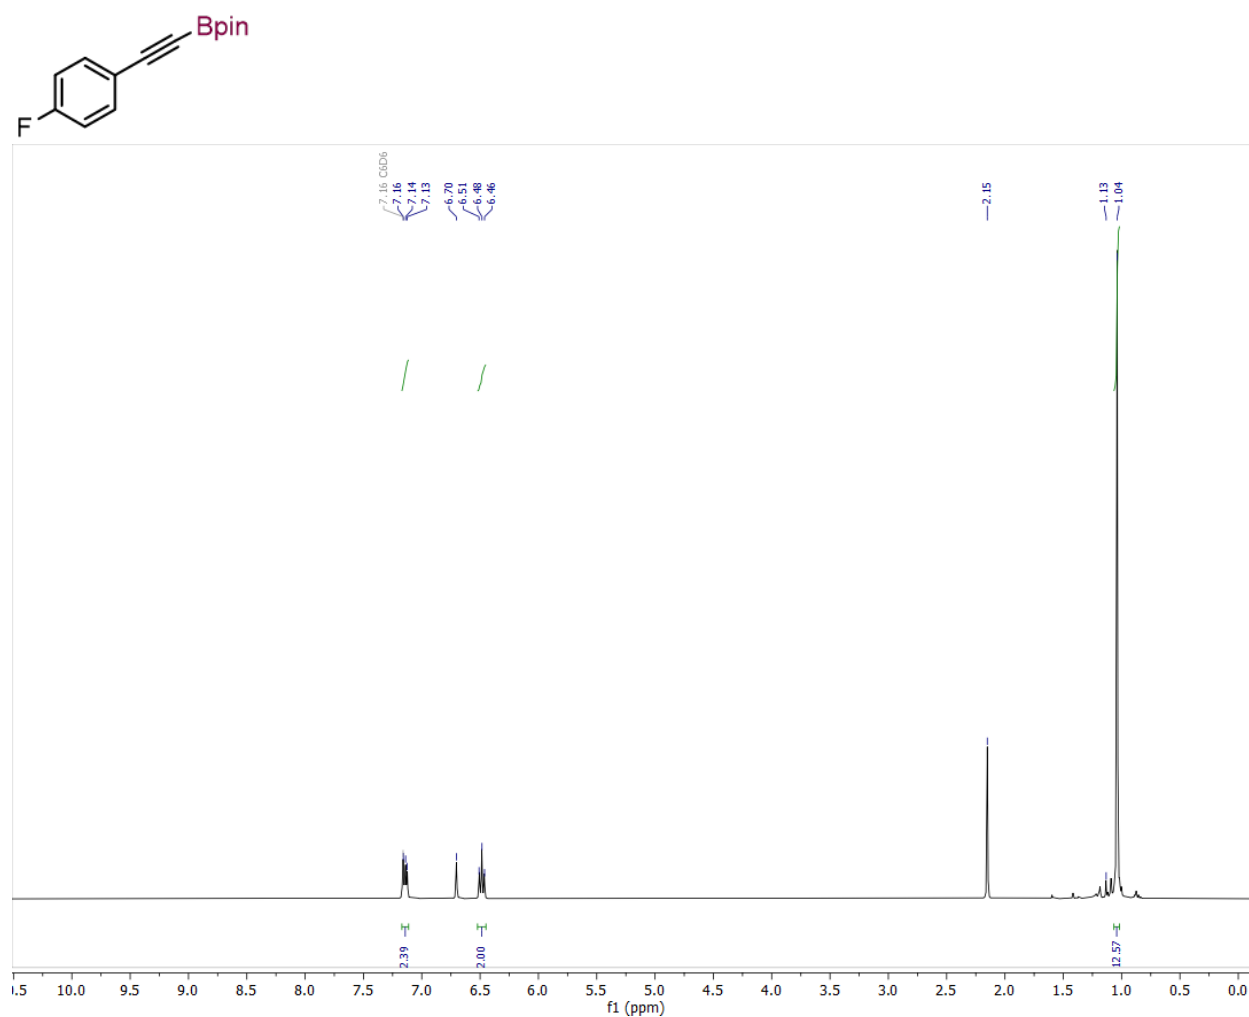

**Figure S28:** <sup>1</sup>H NMR (C<sub>6</sub>D<sub>6</sub>, 400MHz) of 2-((4-fluorophenyl)ethynyl)-4,4,5,5-tetramethyl-1,3,2-dioxaborolane

Peaks at 2.15 and 6.70 ppm correspond to internal standard (mesitylene).

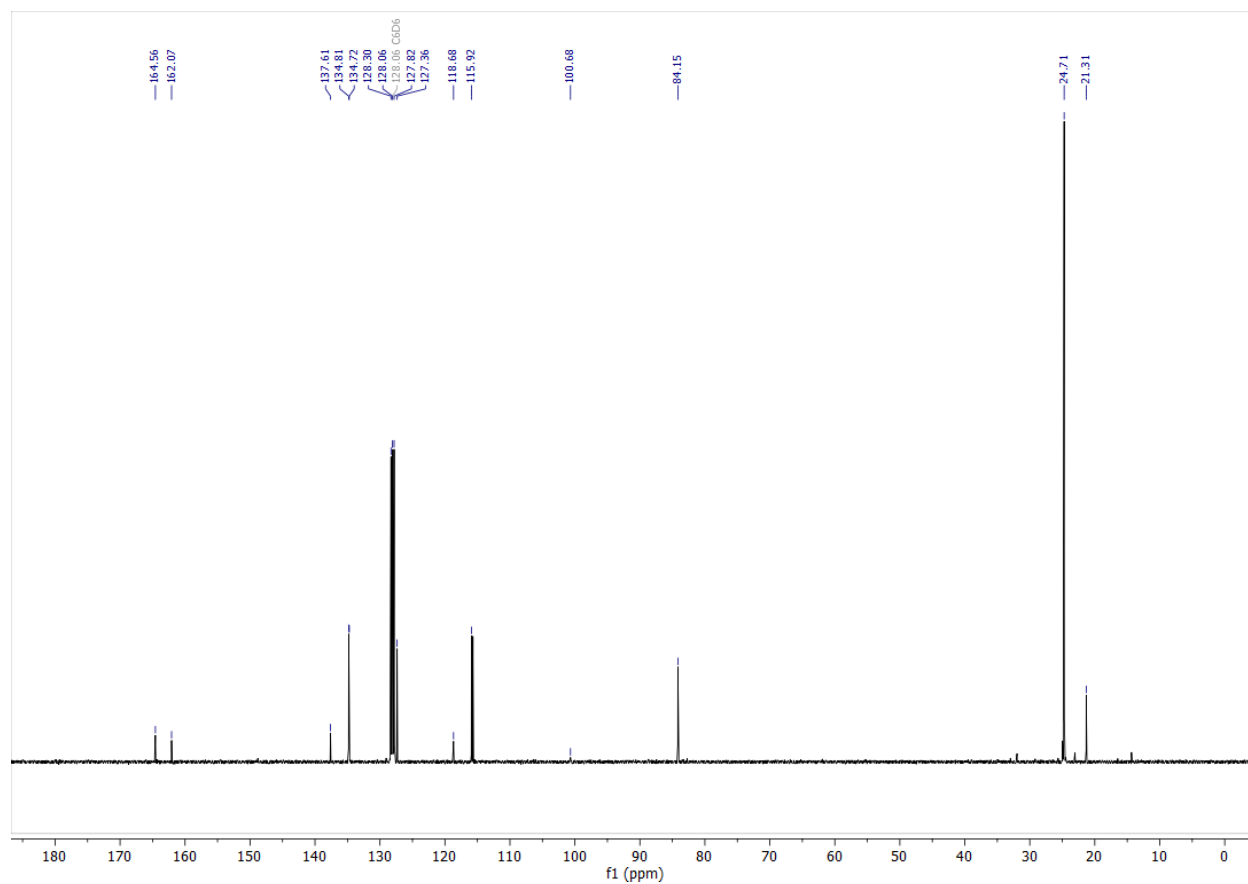

**Figure 29:**  $^{13}\text{C}$  NMR ( $\text{C}_6\text{D}_6$ , 400MHz) of 2-((4-fluorophenyl)ethynyl)-4,4,5,5-tetramethyl-1,3,2-dioxaborolane

Peaks at 21.31, 127.36 and 137.61 ppm correspond to internal standard (mesitylene).



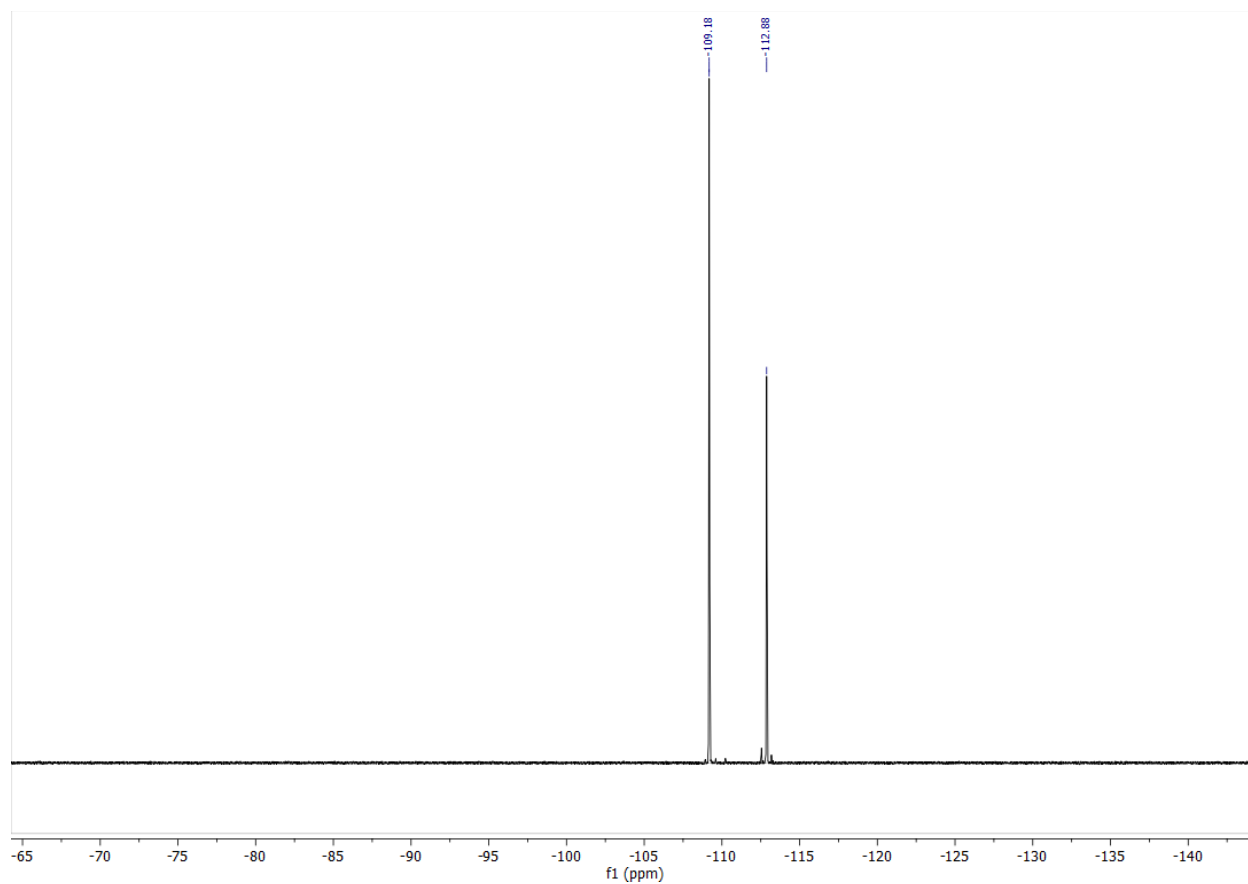

**Figure S30:**  $^{19}\text{F}$  NMR( $\text{C}_6\text{D}_6$ , 400MHz) of 2-((4-fluorophenyl)ethynyl)-4,4,5,5-tetramethyl-1,3,2-dioxaborolane

Peak at  $-112.98$  ppm corresponds to internal standard (fluorobenzene).

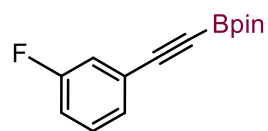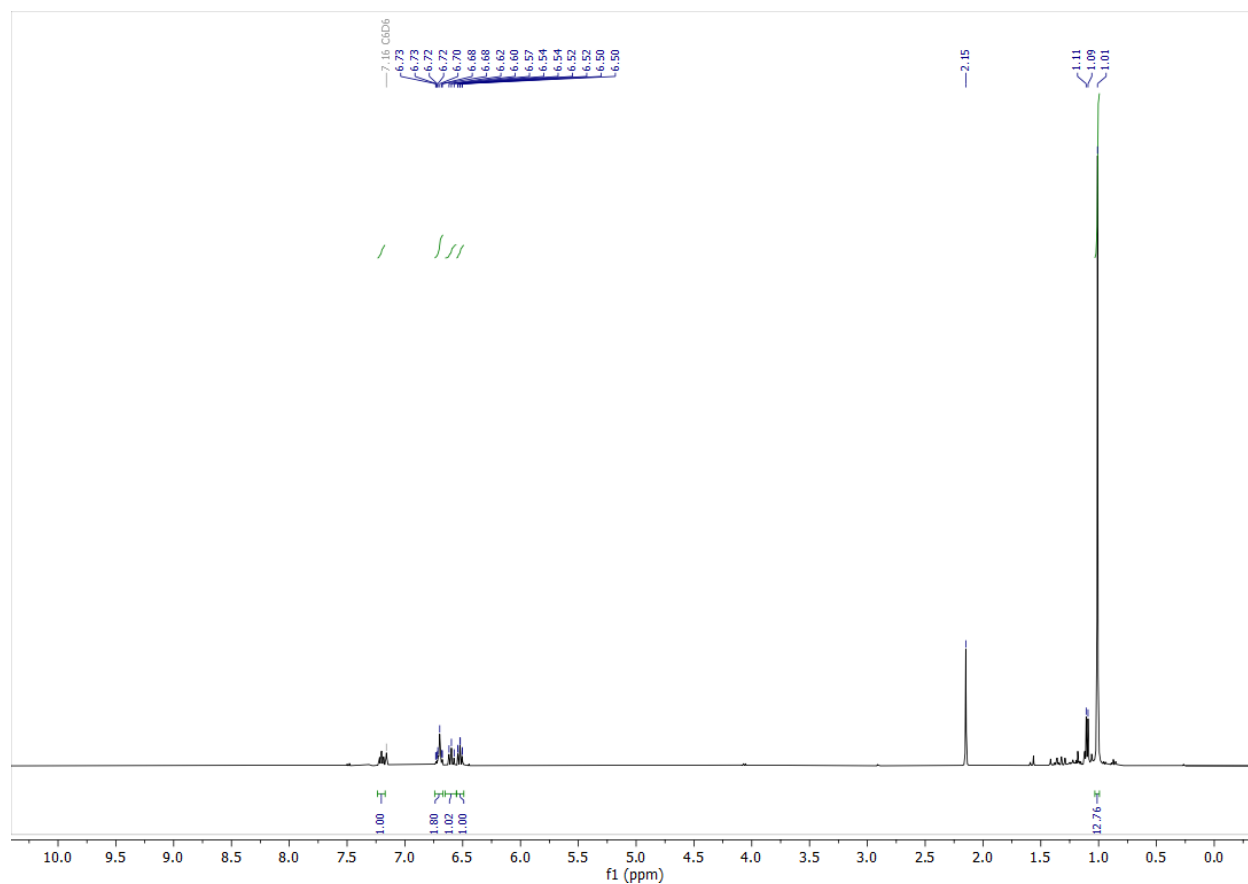

**Figure S31:**  $^1\text{H}$  NMR ( $\text{C}_6\text{D}_6$ , 400MHz) of 2-((3-fluorophenyl)ethynyl)-4,4,5,5-tetramethyl-1,3,2-dioxaborolane

Peaks at 2.15 and 6.70 ppm correspond to internal standard (mesitylene).

Peaks at 1.09 and 1.11 correspond to unidentified impurities.

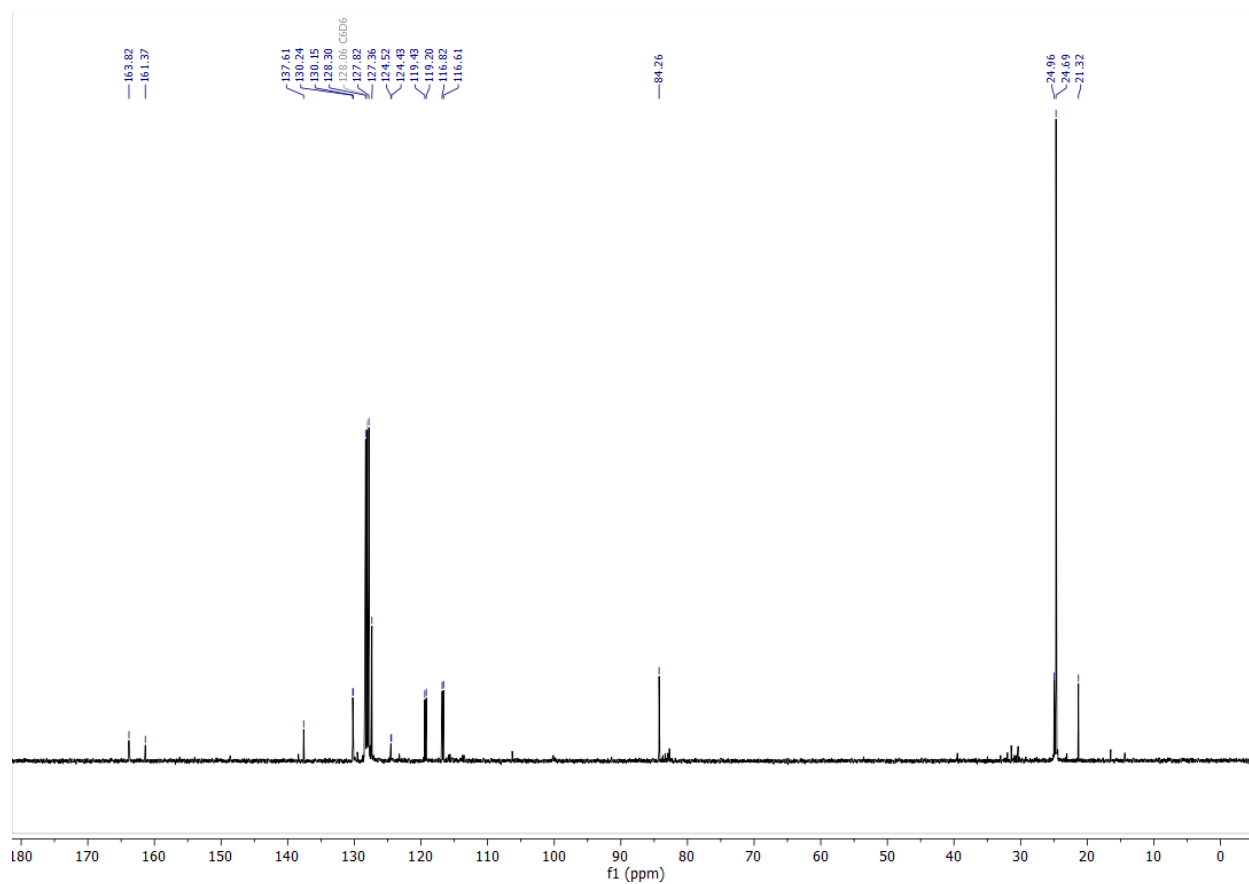

**Figure S32:**  $^{13}\text{C}$  NMR ( $\text{C}_6\text{D}_6$ , 400MHz) of 2-((3-fluorophenyl)ethynyl)-4,4,5,5-tetramethyl-1,3,2-dioxaborolane

Peaks at 21.32, 127.36 and 137.61 ppm correspond to internal standard (mesitylene).

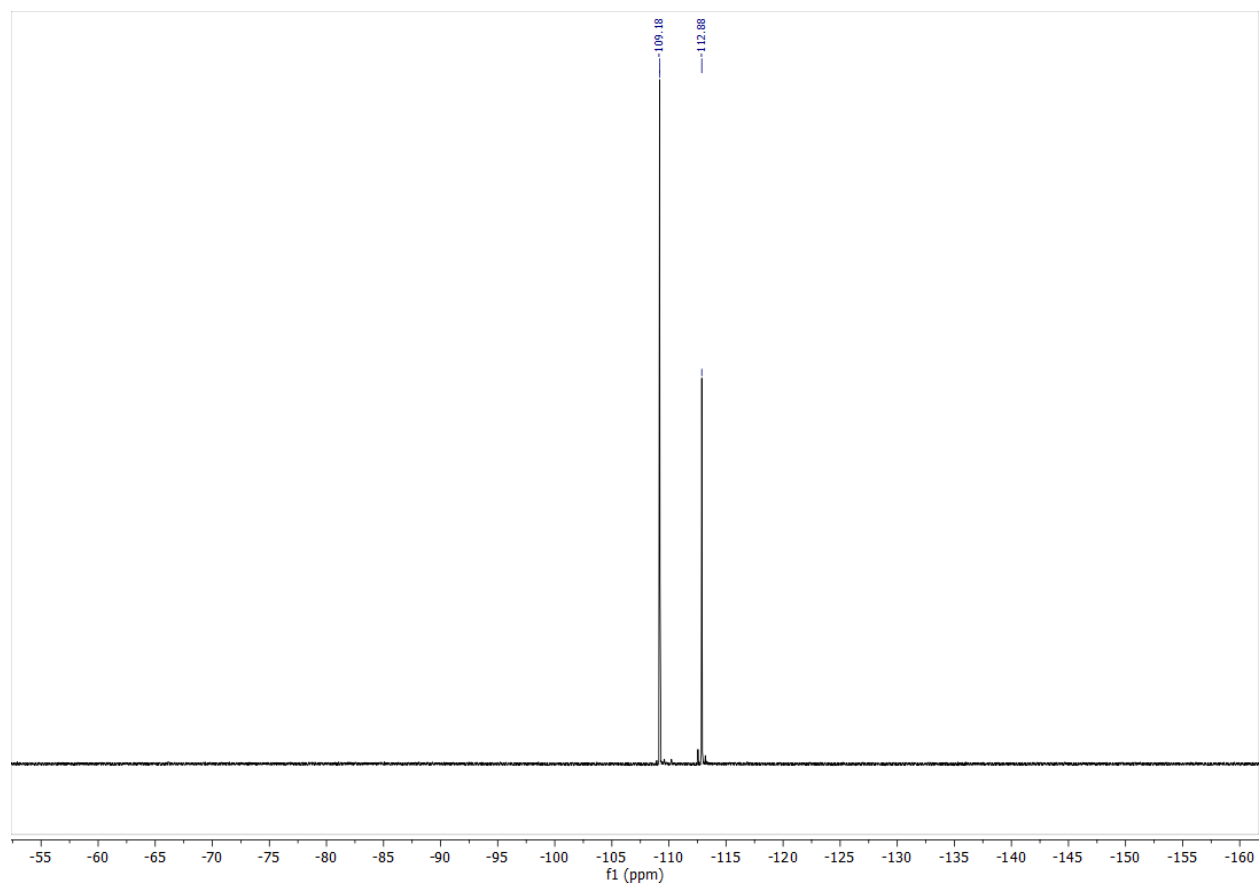

**Figure S33:**  $^{19}\text{F}$  NMR ( $\text{C}_6\text{D}_6$ , 400MHz) of 2-((3-fluorophenyl)ethynyl)-4,4,5,5-tetramethyl-1,3,2-dioxaborolane

Peak at -112.88 ppm corresponds to internal standard (fluorobenzene).

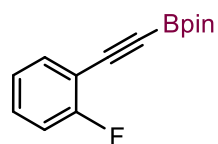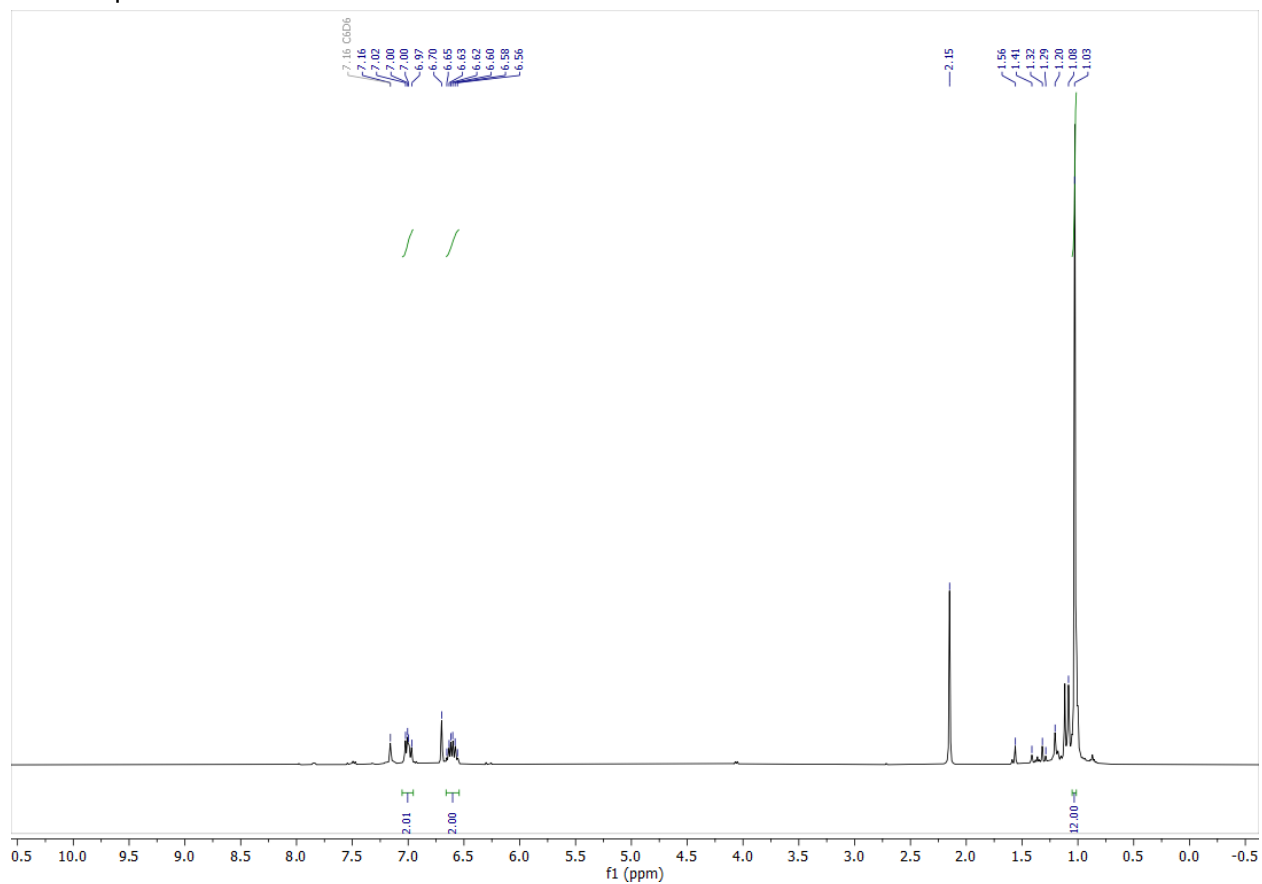

**Figure S34:** <sup>1</sup>H NMR (C<sub>6</sub>D<sub>6</sub>, 400MHz) of 2-((2-fluorophenyl)ethynyl)-4,4,5,5-tetramethyl-1,3,2-dioxaborolane

Peaks at 2.15 and 6.70 ppm correspond to internal standard (mesitylene).

Peaks at 1.08, 1.20, 1.28, 1.29, 1.32, 1.41, 1.56 correspond to unidentified impurities.

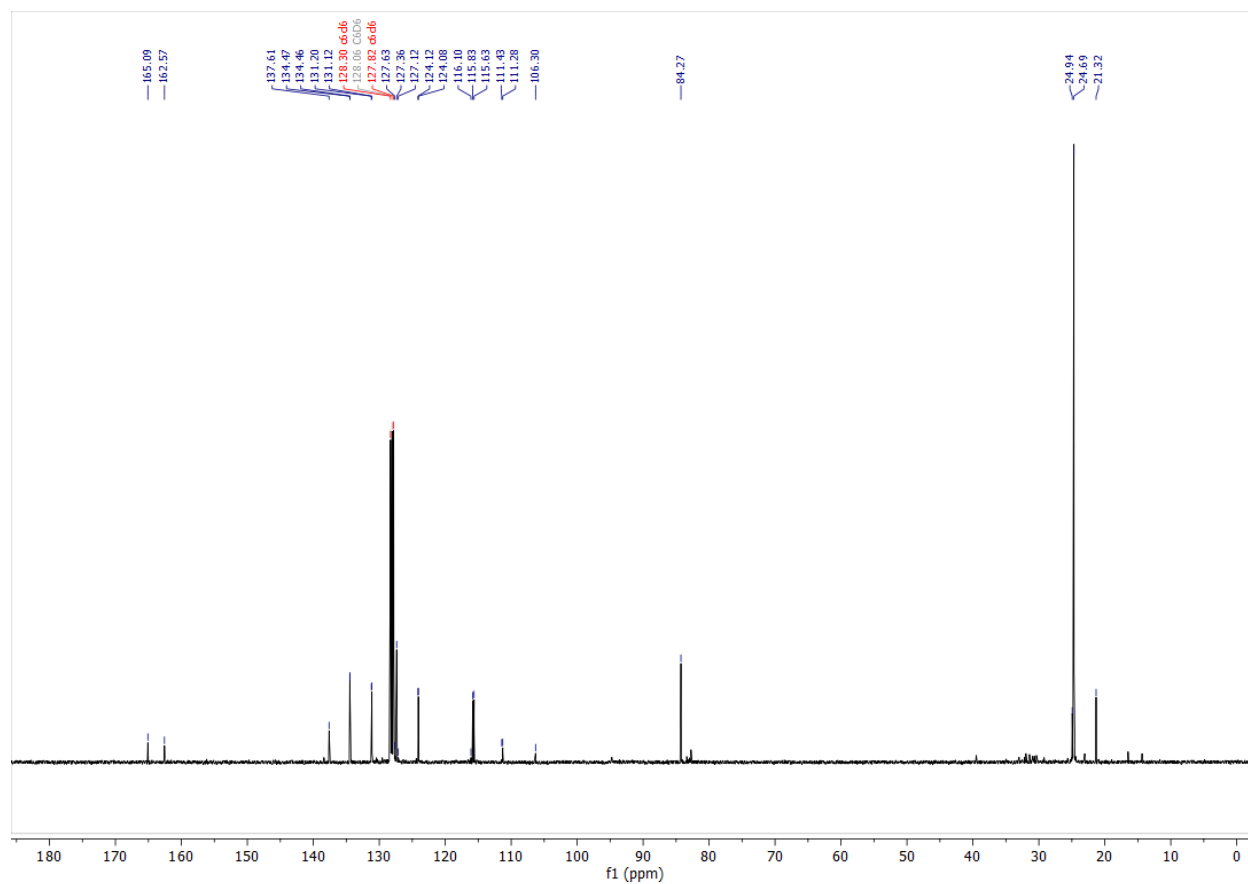

**Figure S35:**  $^{13}C$  NMR ( $C_6D_6$ , 400MHz) of 2-((2-fluorophenyl)ethynyl)-4,4,5,5-tetramethyl-1,3,2-dioxaborolane

Peaks at 21.32, 127.36 and 137.61 ppm correspond to internal standard (mesitylene).

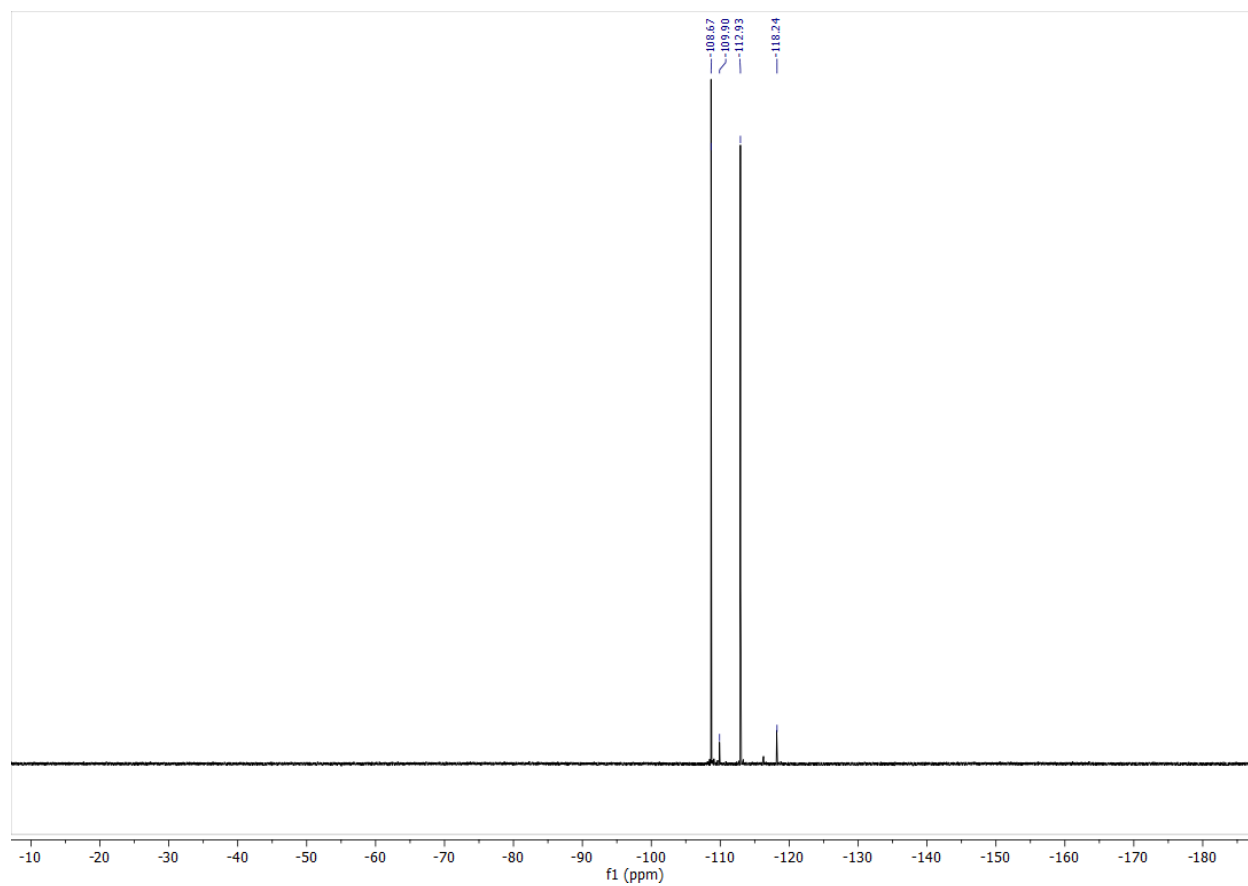

**Figure S36:**  $^{19}\text{F}$  NMR ( $\text{C}_6\text{D}_6$ , 400MHz) of 2-((2-fluorophenyl)ethynyl)-4,4,5,5-tetramethyl-1,3,2-dioxaborolane

Peak at -112.93 ppm corresponds to internal standard (fluorobenzene).

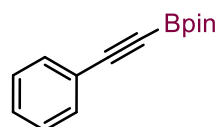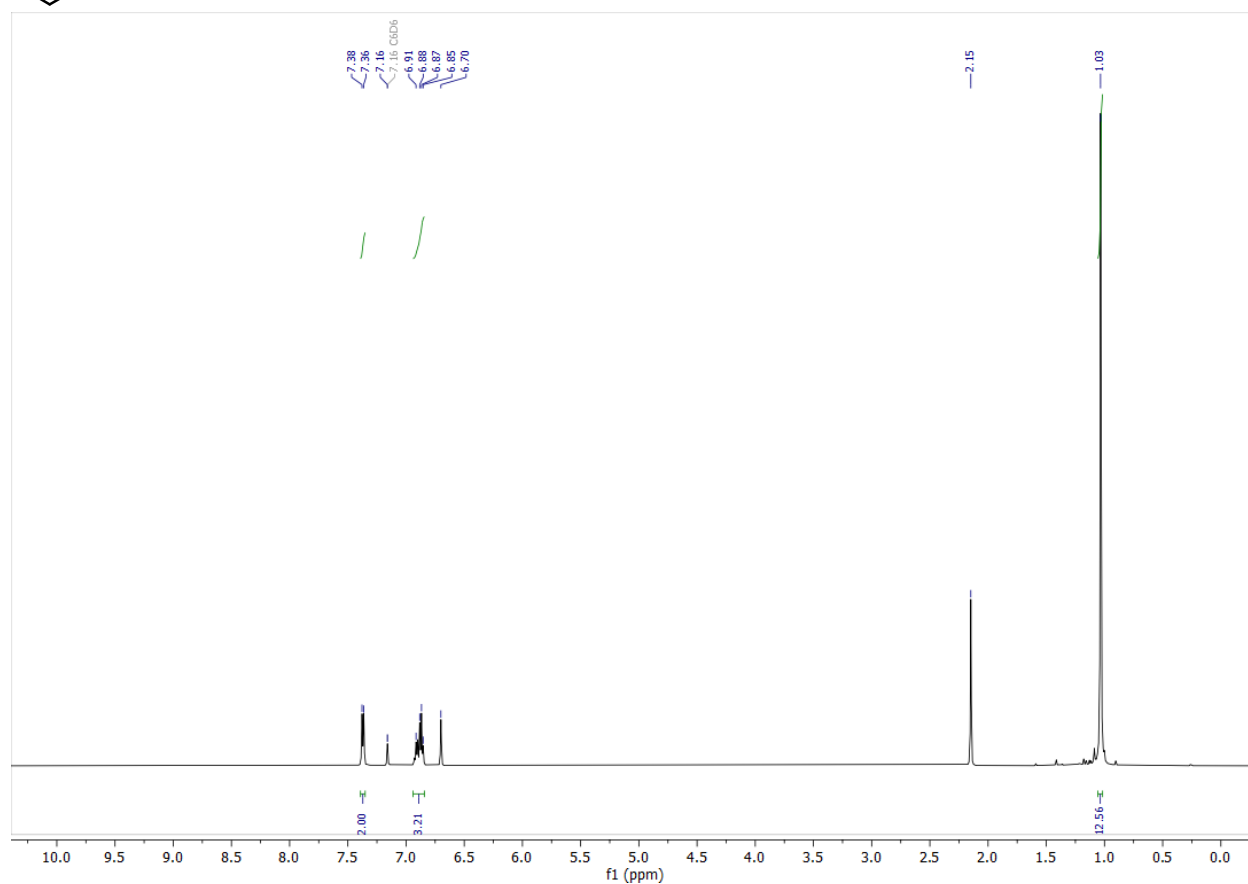

**Figure S37:**  $^1\text{H}$  NMR ( $\text{CDCl}_3$ , 500MHz) of 4,4,5,5-Tetramethyl-2-(phenylethynyl)-1,3,2-dioxaborolane

Peaks at 2.15 and 6.70 ppm correspond to internal standard (mesitylene).



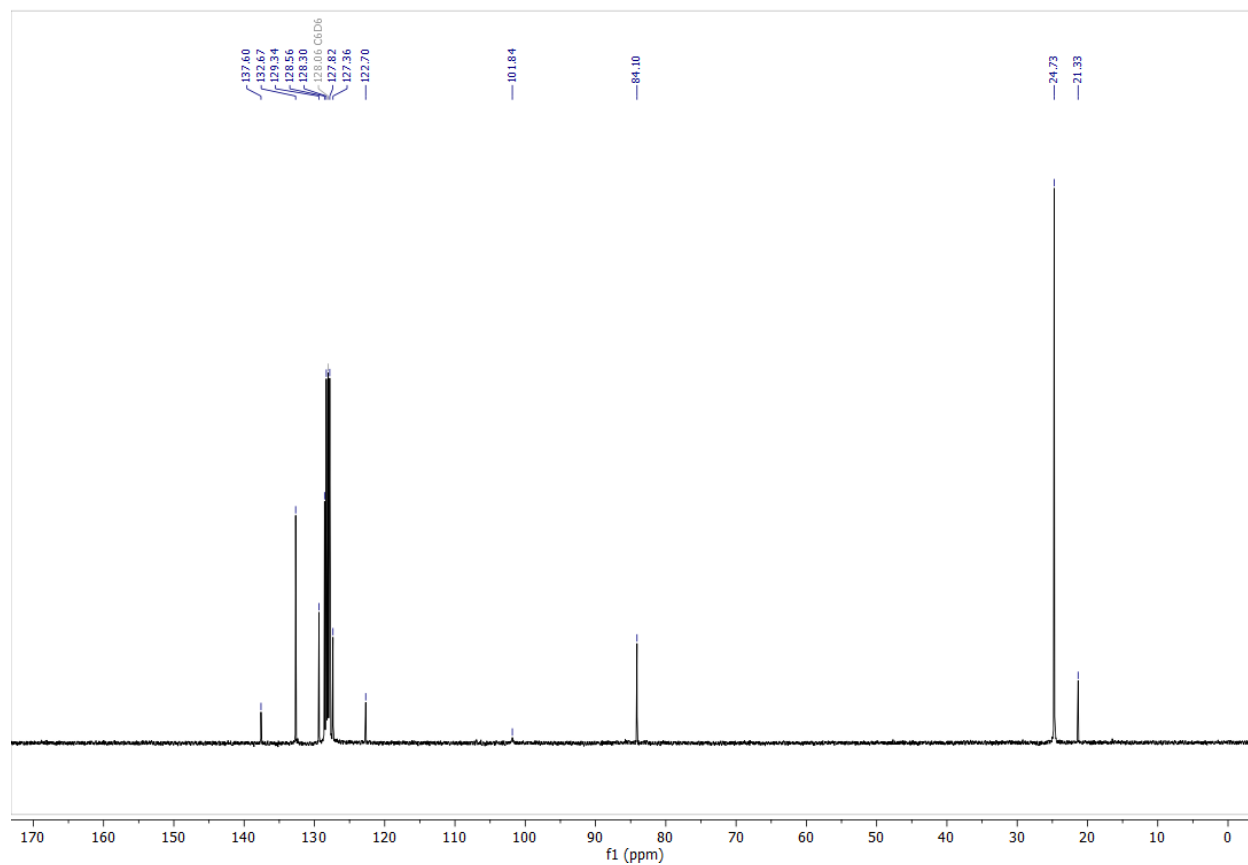

**Figure S38:**  $^{13}\text{C}$  NMR ( $\text{C}_6\text{D}_6$ , 400MHz) of 4,4,5,5-Tetramethyl-2-(phenylethynyl)-1,3,2-dioxaborolane

Peaks at 21.33, 127.36 and 137.60 ppm correspond to internal standard (mesitylene).

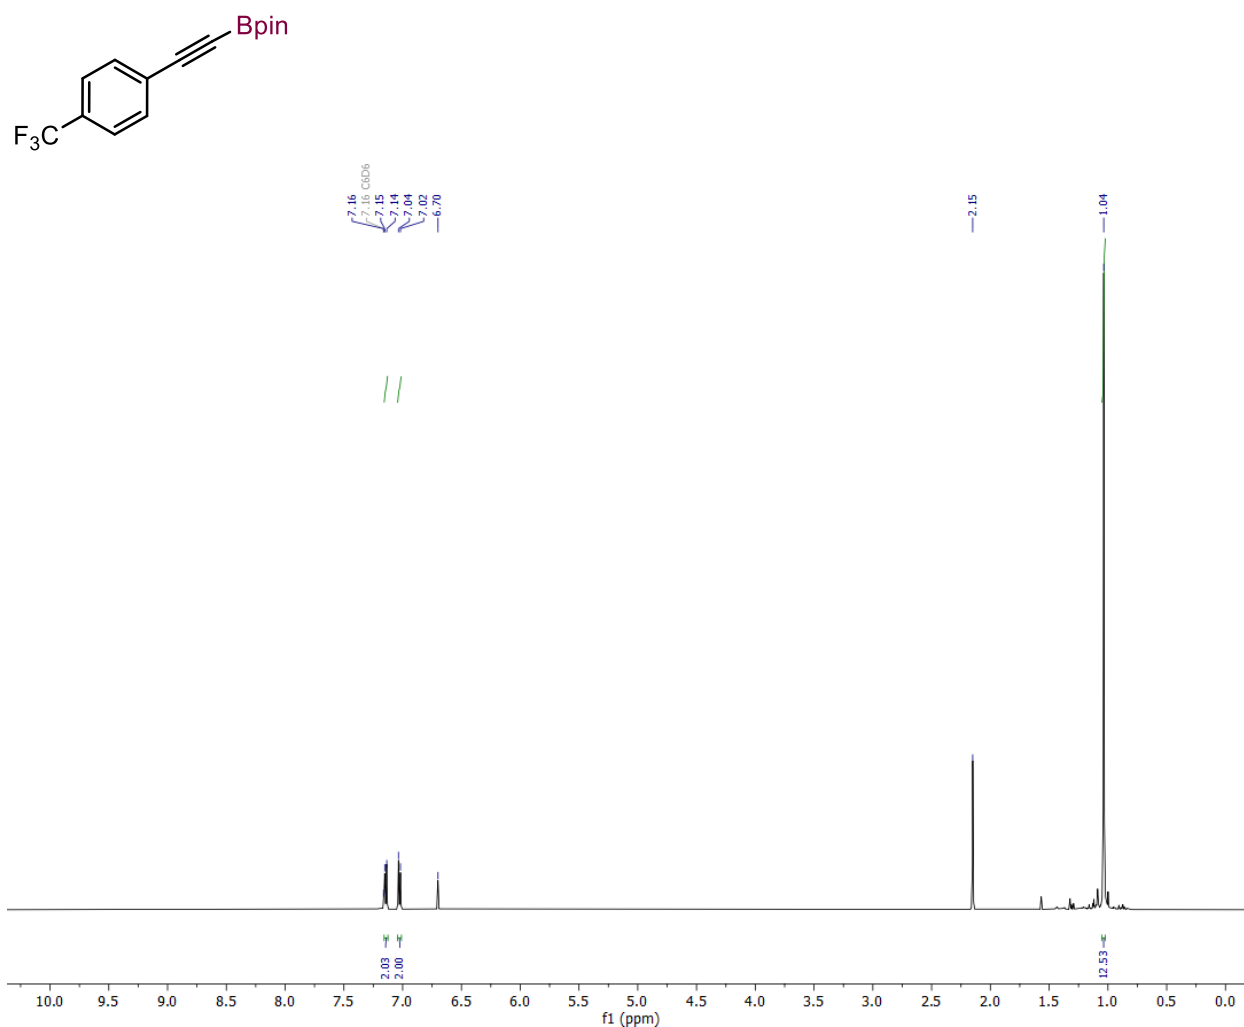

**Figure S39:** <sup>1</sup>H NMR (C<sub>6</sub>D<sub>6</sub>, 500MHz) of 4,4,5,5-tetramethyl-2-((4-(trifluoromethyl)phenyl)ethynyl)-1,3,2-dioxaborolane  
 Peaks at 2.15 and 6.70 ppm correspond to internal standard (mesitylene).

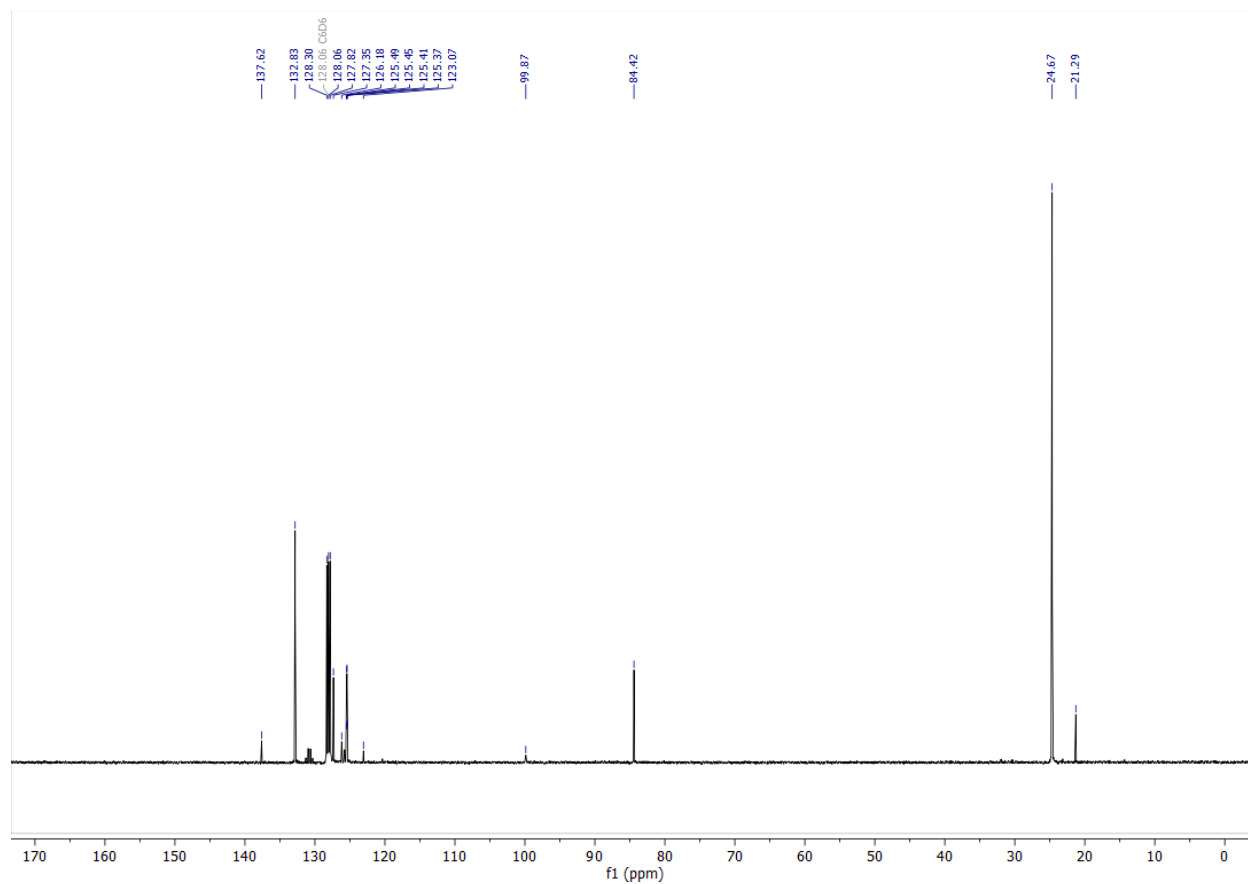

**Figure S40:**  $^{13}\text{C}$  NMR ( $\text{C}_6\text{D}_6$ , 400MHz) of 4,4,5,5-tetramethyl-2-((4-(trifluoromethyl)phenyl)ethynyl)-1,3,2-dioxaborolane  
 Peaks at 21.29, 127.35 and 137.62 ppm correspond to internal standard (mesitylene).

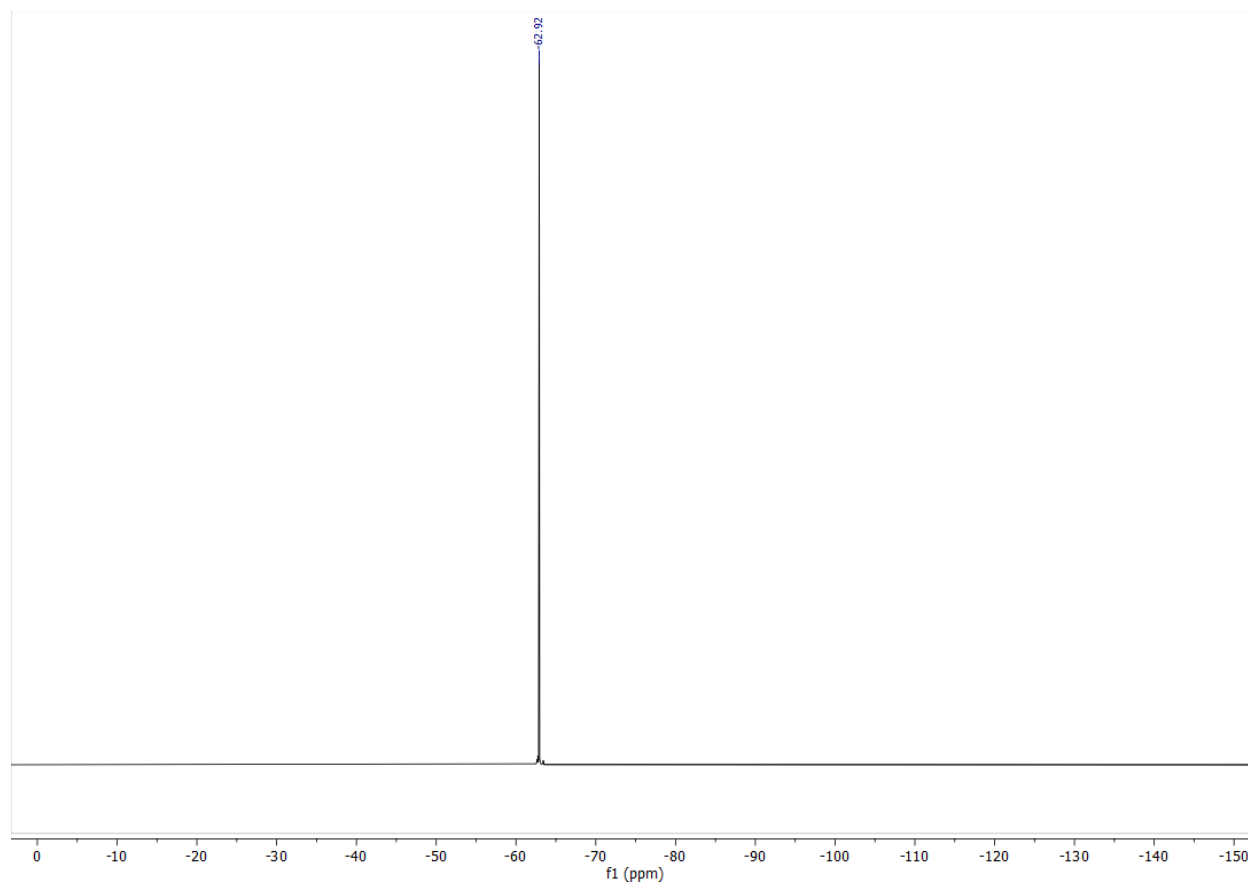

**Figure S41:**  $^{19}\text{F}$  NMR ( $\text{C}_6\text{D}_6$ , 400MHz) of 4,4,5,5-tetramethyl-2-((4-(trifluoromethyl)phenyl)ethynyl)-1,3,2-dioxaborolane

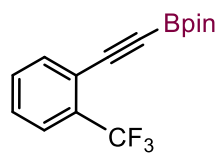

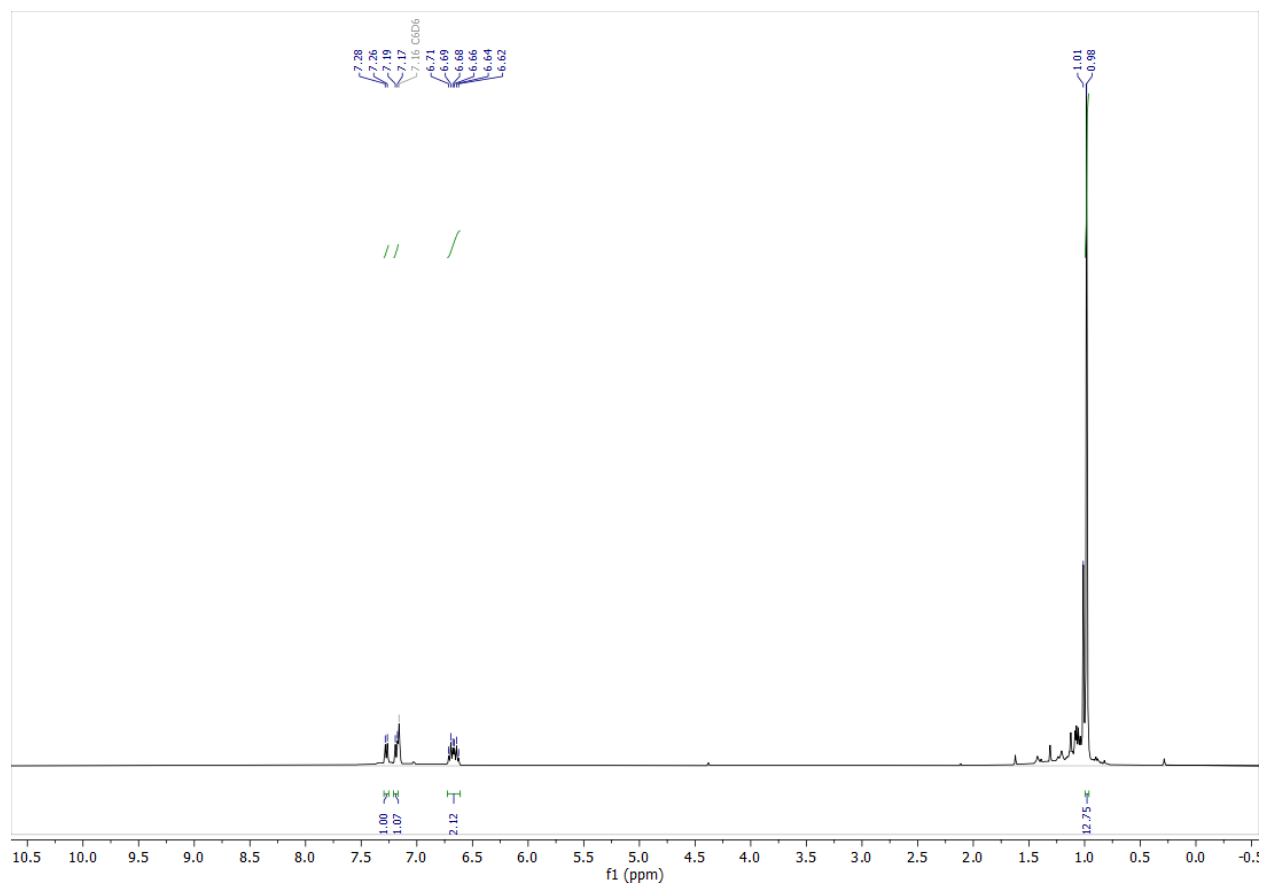

**Figure S42:**  $^1\text{H}$  NMR ( $\text{C}_6\text{D}_6$ , 400MHz) of 4,4,5,5-tetramethyl-2-((2-(trifluoromethyl)phenyl)ethynyl)-1,3,2-dioxaborolane  
Peak at 1.01 corresponds to unidentified impurity.

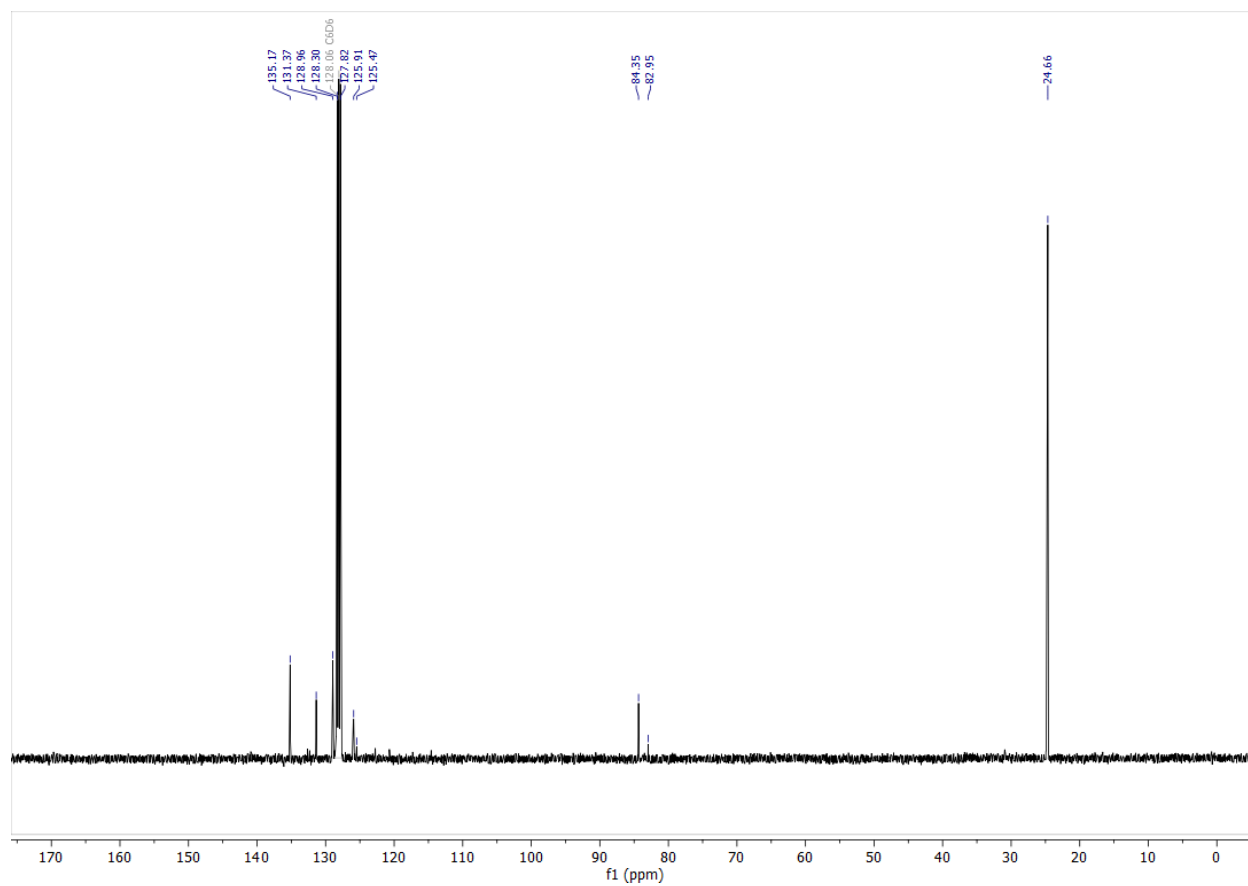

**Figure S43:**  $^{13}\text{C}$  NMR ( $\text{C}_6\text{D}_6$ , 400MHz) of 4,4,5,5-tetramethyl-2-((2-(trifluoromethyl)phenyl)ethynyl)-1,3,2-dioxaborolane

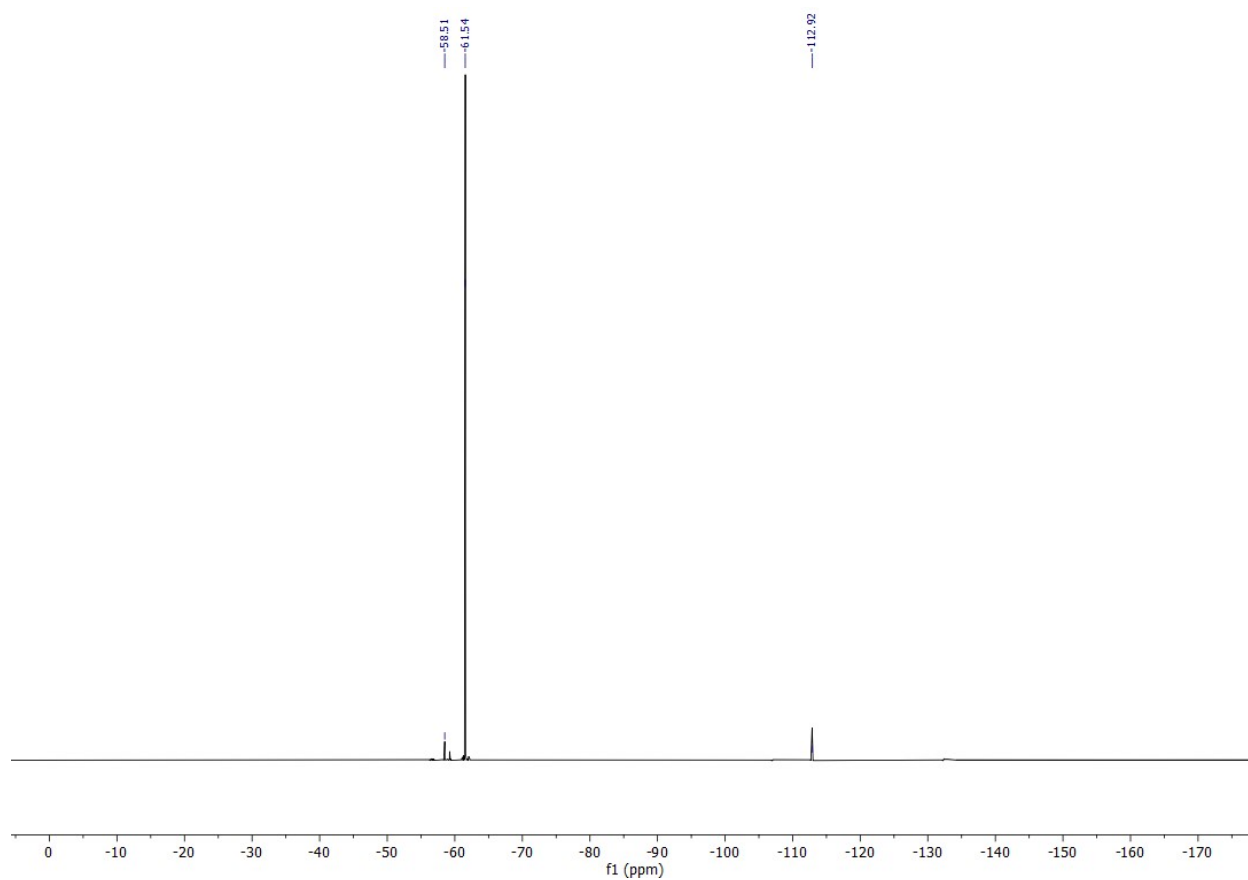

**Figure S44:**  $^{19}\text{F}$  NMR ( $\text{C}_6\text{D}_6$ , 400MHz) of 4,4,5,5-tetramethyl-2-((2-(trifluoromethyl)phenyl)ethynyl)-1,3,2-dioxaborolane

Peak at -112.92 corresponds to internal standard.

Peak at -58.51 corresponds to unidentified impurity.

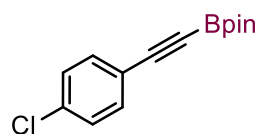

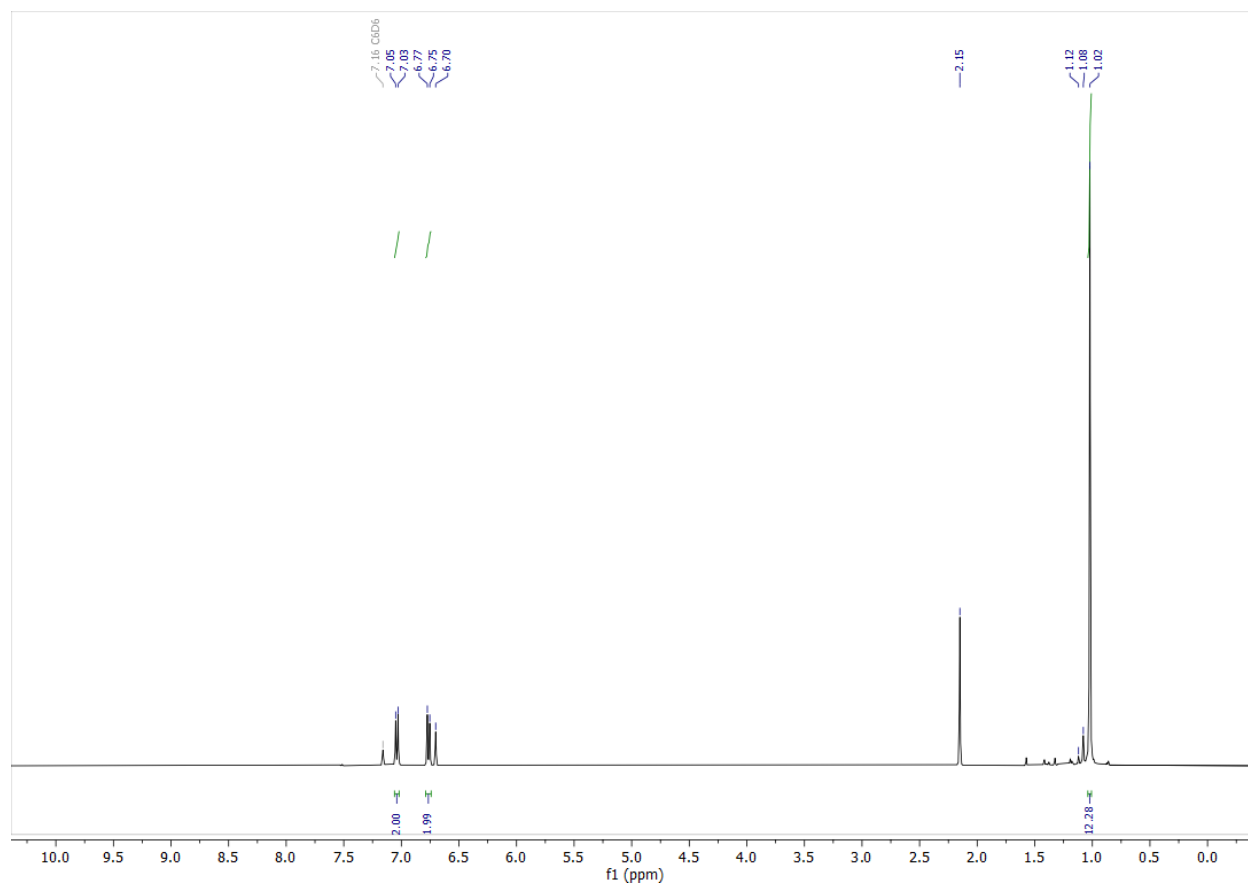

**Figure S45:**  $^1\text{H}$  NMR ( $\text{C}_6\text{D}_6$ , 400MHz) of 2-((4-chlorophenyl)ethynyl)-4,4,5,5-tetramethyl-1,3,2-dioxaborolane

Peaks at 2.15 and 6.70 ppm correspond to internal standard (mesitylene).



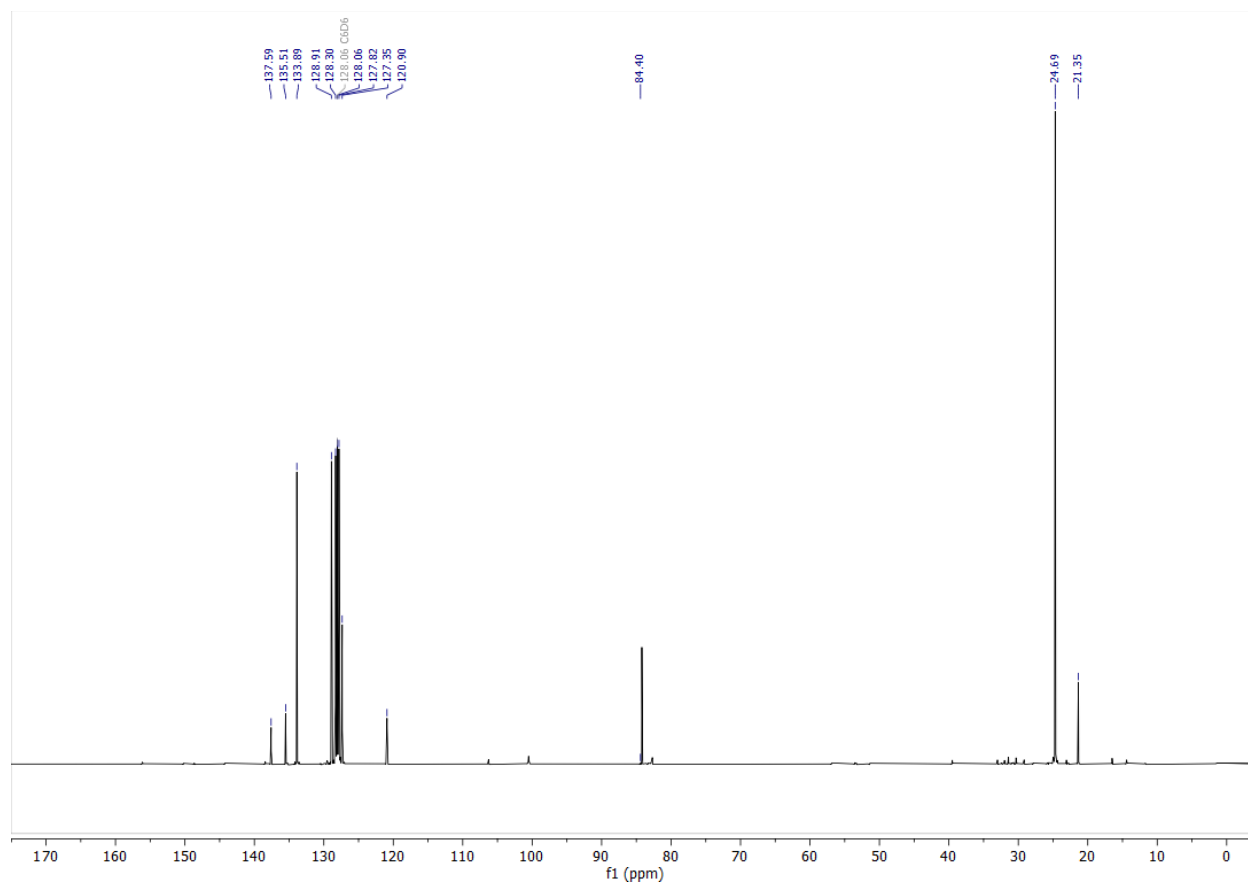

**Figure S46:**  $^{13}\text{C}$  NMR( $\text{C}_6\text{D}_6$ , 400MHz) of 2-((4-chlorophenyl)ethynyl)-4,4,5,5-tetramethyl-1,3,2-dioxaborolane

Peaks at 21.35, 127.35 and 137.59 ppm correspond to internal standard (mesitylene).

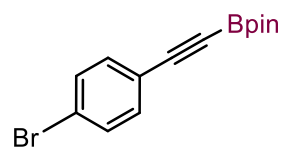

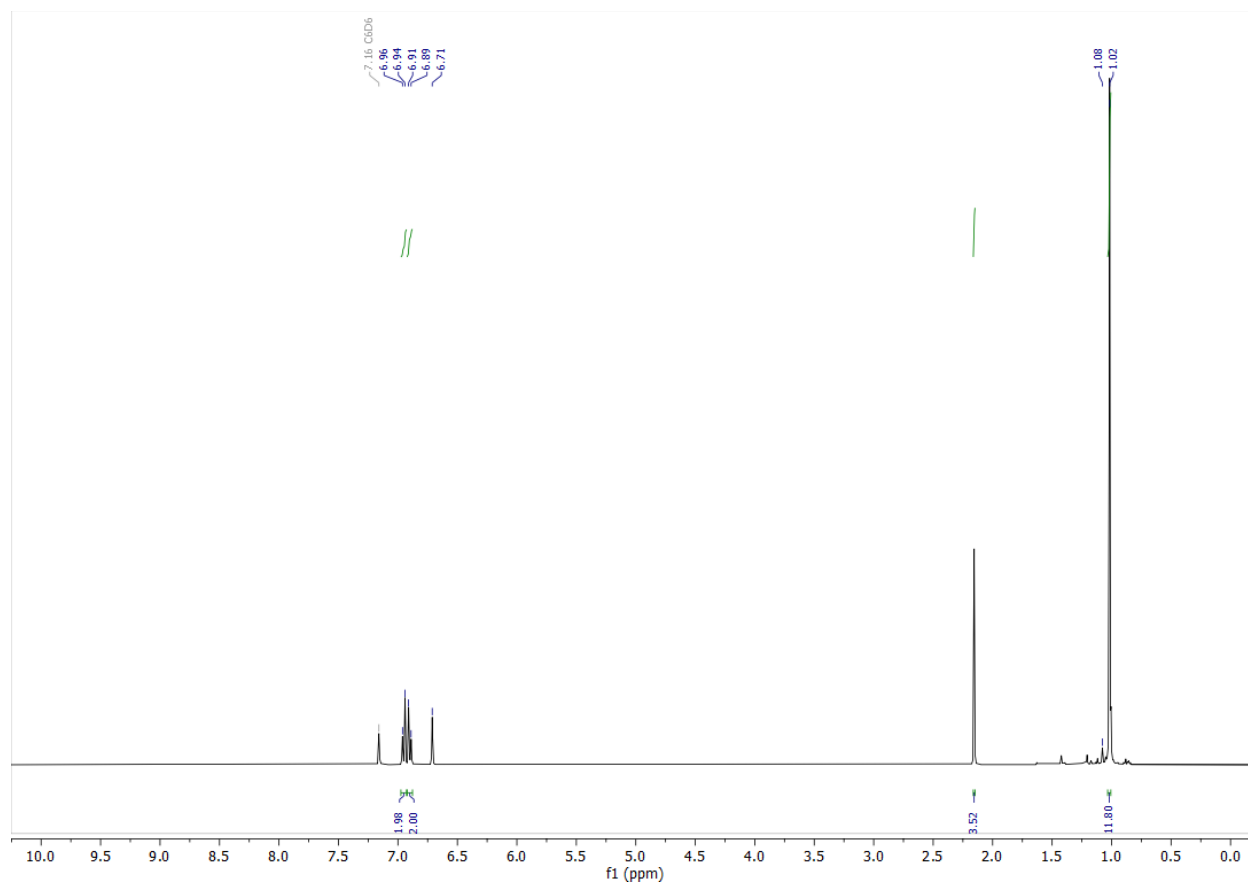

**Figure S47:**  $^1\text{H}$  NMR ( $\text{C}_6\text{D}_6$ , 400MHz) of 2-((4-bromophenyl)ethynyl)-4,4,5,5-tetramethyl-1,3,2-dioxaborolane

Peaks at 2.15 and 6.70 ppm correspond to internal standard (mesitylene).

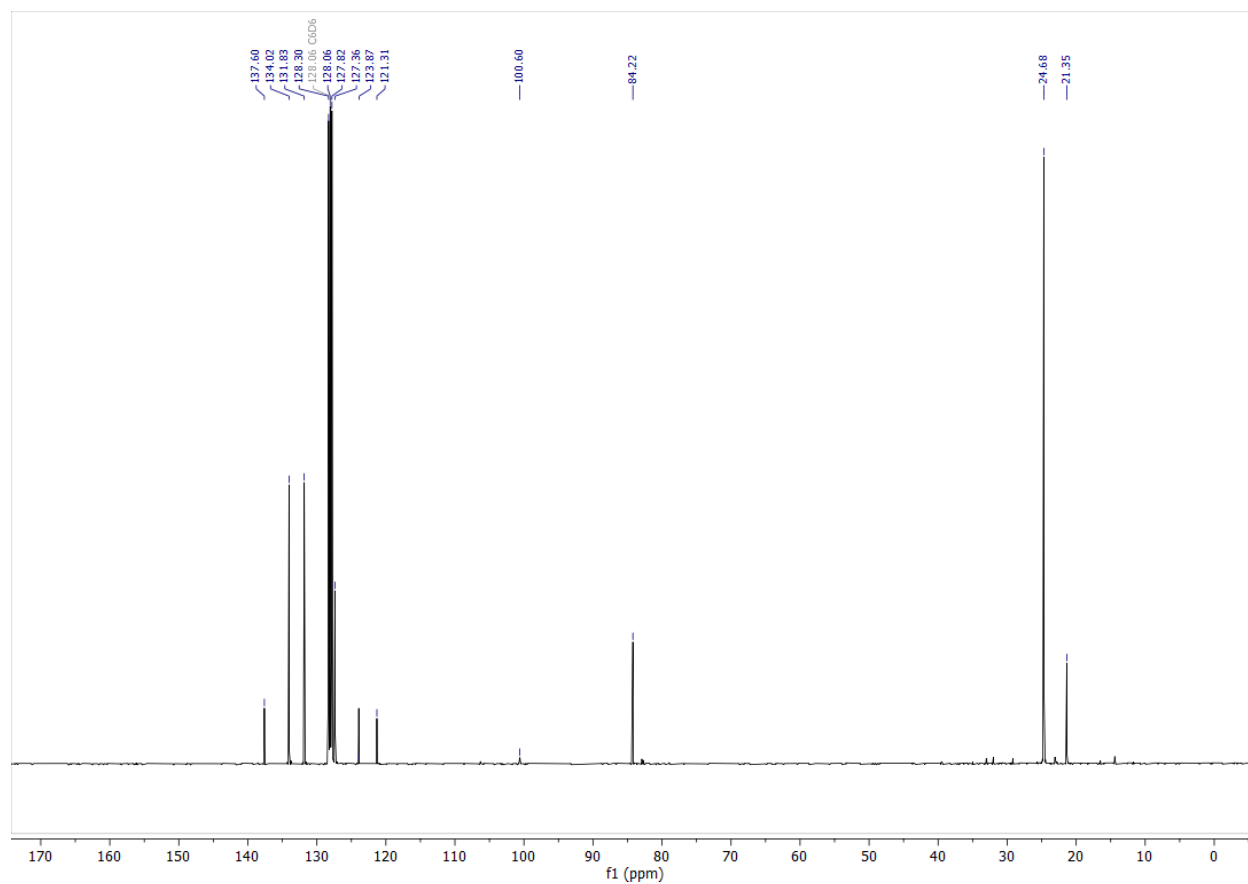

**Figure S48:**  $^{13}\text{C}$  NMR ( $\text{C}_6\text{D}_6$ , 400MHz) of 2-((4-bromophenyl)ethynyl) 4,4,5,5-tetramethyl-1,3,2-dioxaborolane

Peaks at 21.35, 127.36 and 137.60 ppm correspond to internal standard (mesitylene).

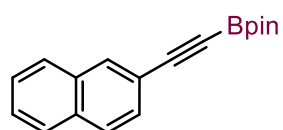

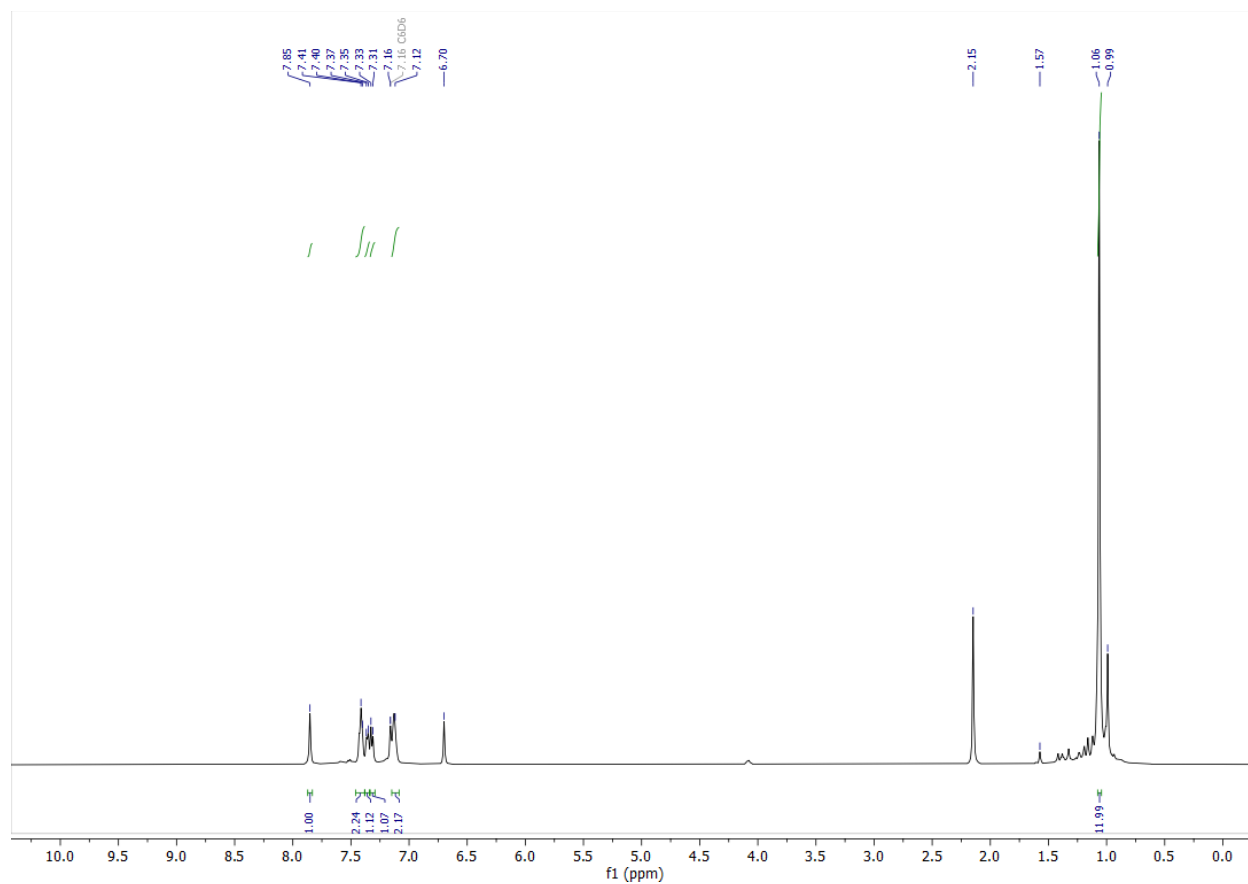

**Figure S49:**  $^1\text{H}$  NMR ( $\text{C}_6\text{D}_6$ , 500MHz) of 4,4,5,5-tetramethyl-2-[2-(naphthalen-2-yl)ethynyl]-1,3,2-dioxaborolane

Peaks at 2.15 and 6.70 ppm correspond to internal standard (mesitylene).

Peaks at 0.99 and 1.57 correspond to unidentified impurities.

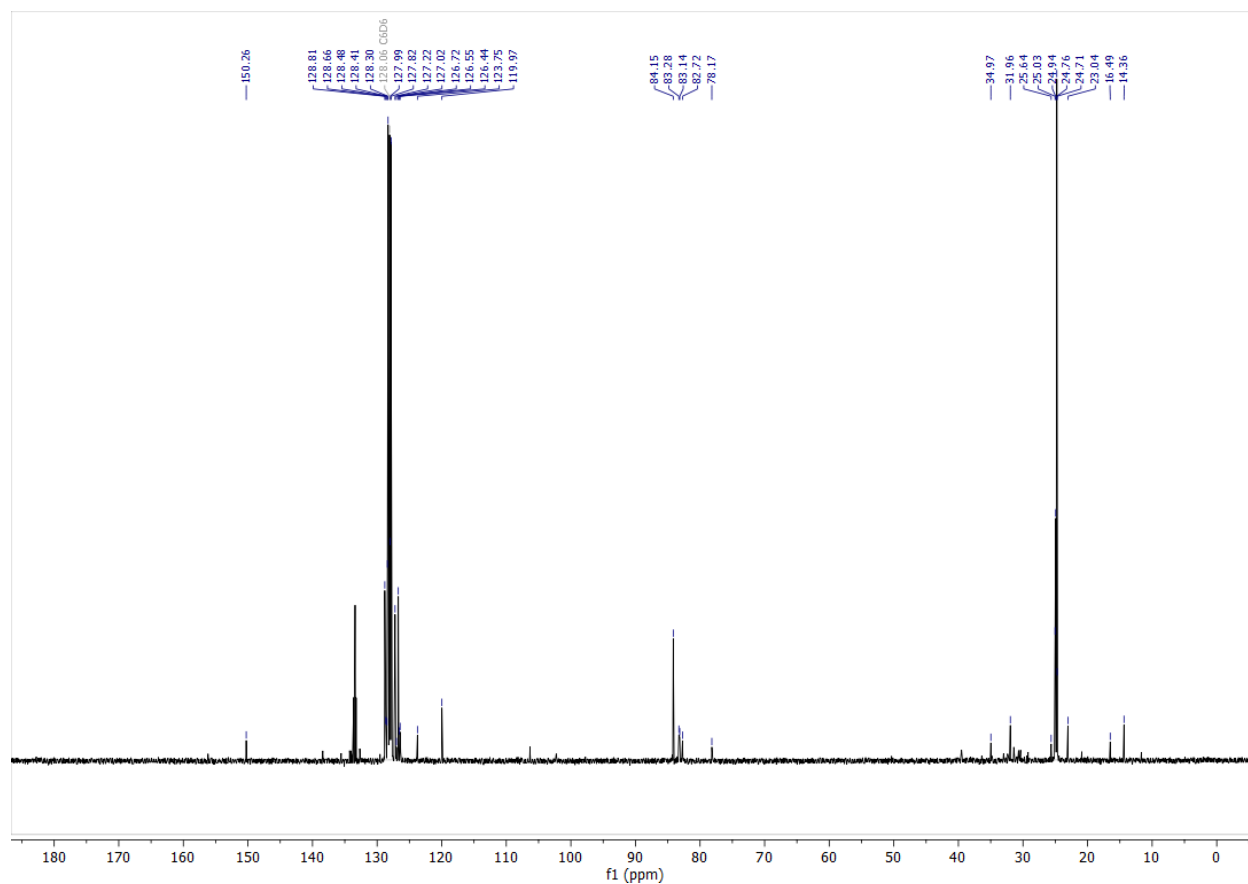

**Figure S50:**  $^{13}\text{C}$  NMR ( $\text{C}_6\text{D}_6$ , 500MHz) of 4,4,5,5-tetramethyl-2-[2-(naphthalen-2-yl)ethynyl]-1,3,2-dioxaborolane

Peaks at 14.36, 16.49, 23.04, 24.94, 25.03, 82.72, 83.28, 83.14 and 123.75 correspond to unidentified impurities.

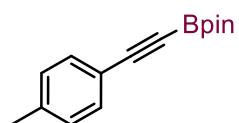

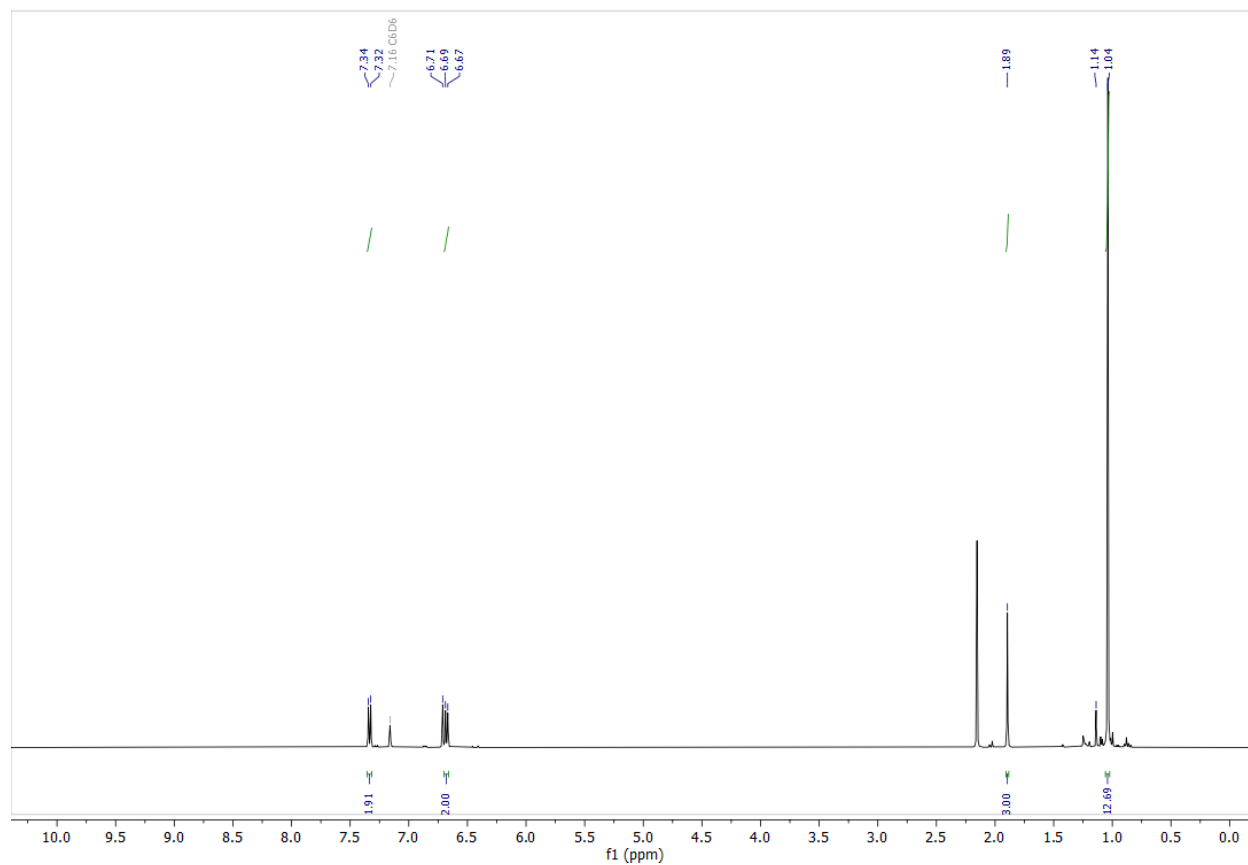

**Figure S51:**  $^1\text{H}$  NMR ( $\text{C}_6\text{D}_6$ , 400MHz) of 2-((4-methylphenyl)ethynyl)-4,4,5,5-tetramethyl-1,3,2-dioxaborolane

Peaks at 2.15 and 6.70 ppm correspond to internal standard (mesitylene).

Peak at 1.14 corresponds to unidentified impurity.

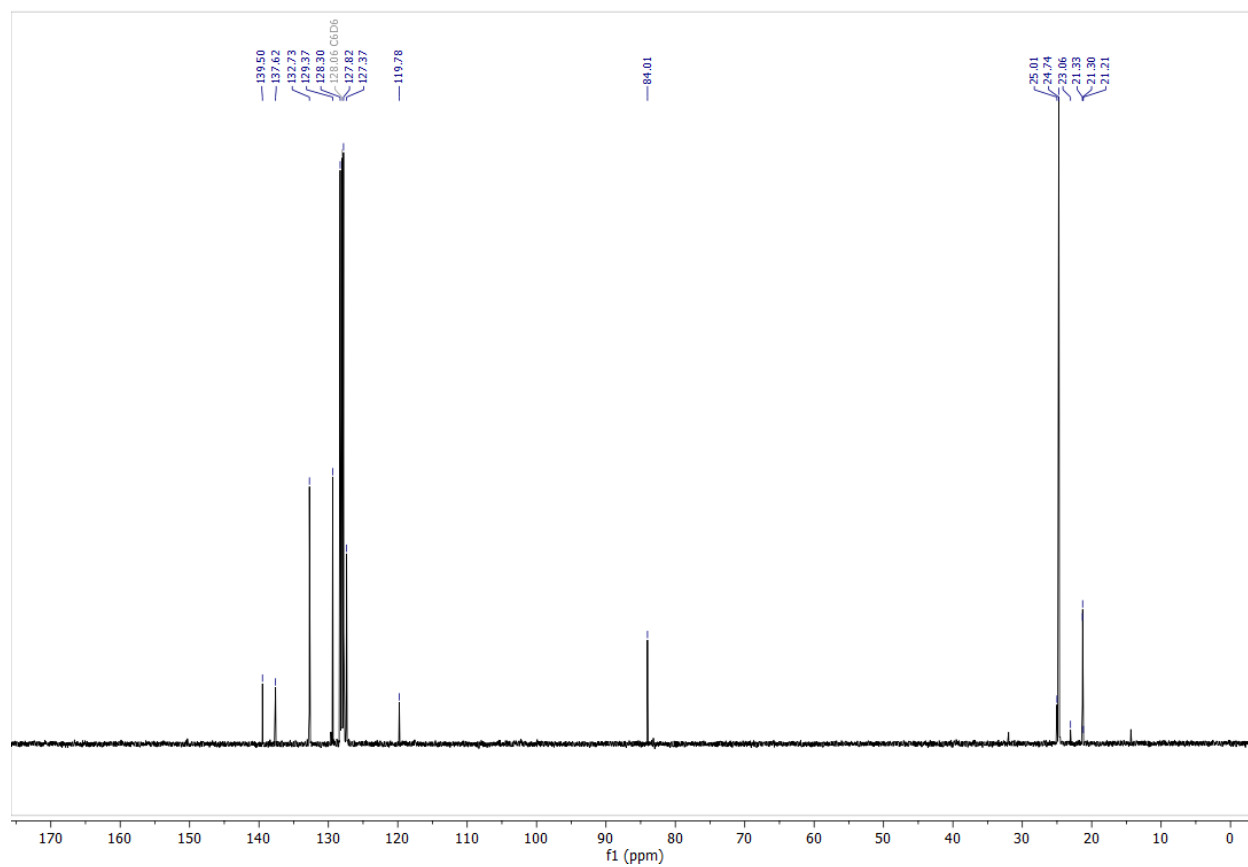

**Figure S52:**  $^{13}\text{C}$  NMR ( $\text{C}_6\text{D}_6$ , 400MHz) of 2-((4-methylphenyl)ethynyl)-4,4,5,5-tetramethyl-1,3,2-dioxaborolane

Peaks at 21.33, 127.37 and 137.62 ppm correspond to internal standard (mesitylene).

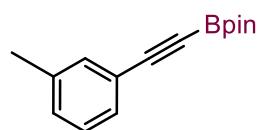

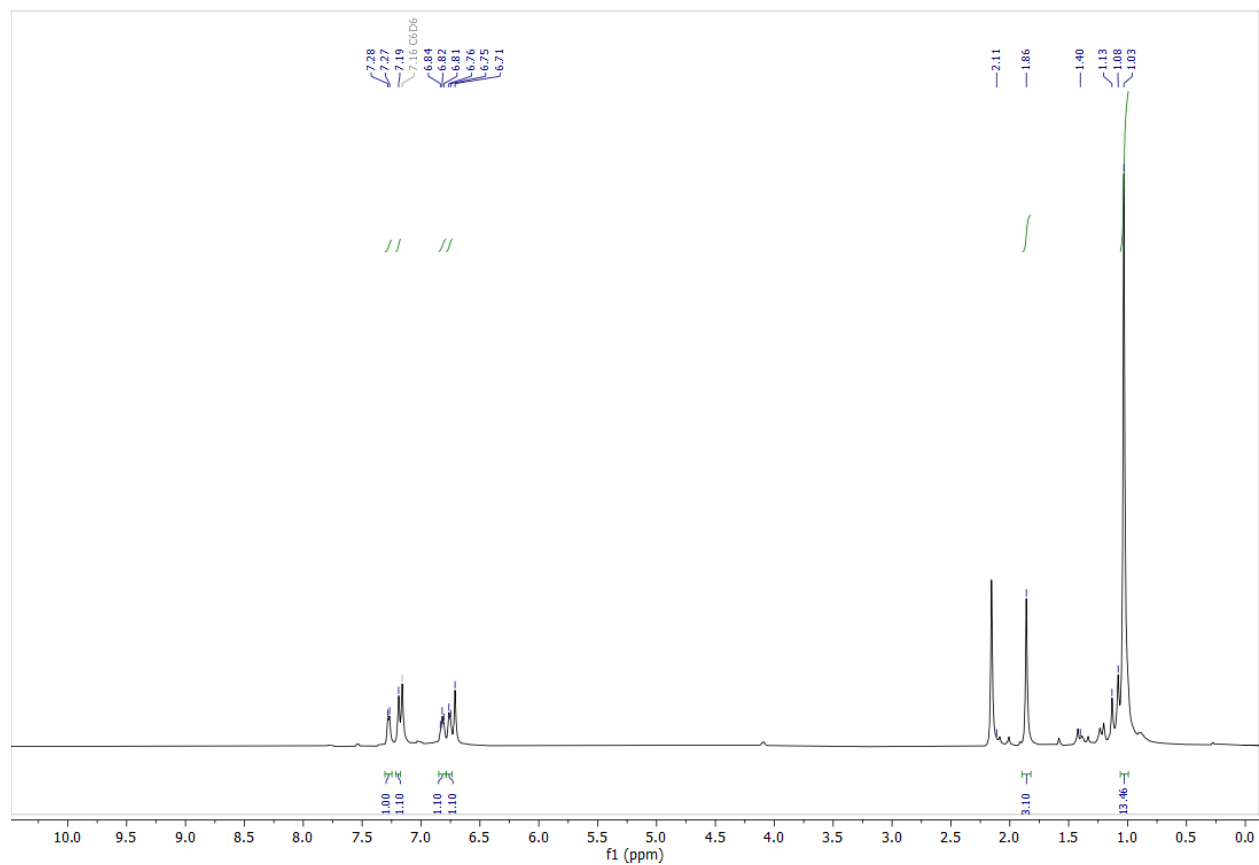

**Figure S53:**  $^1\text{H}$  NMR ( $\text{C}_6\text{D}_6$ , 500MHz) of 2-((3-methylphenyl)ethynyl)-4,4,5,5-tetramethyl-1,3,2-dioxaborolane

Peaks at 2.11 and 6.71 ppm correspond to internal standard (mesitylene).

Peaks at 1.08 and 1.13 correspond to unidentified impurities.



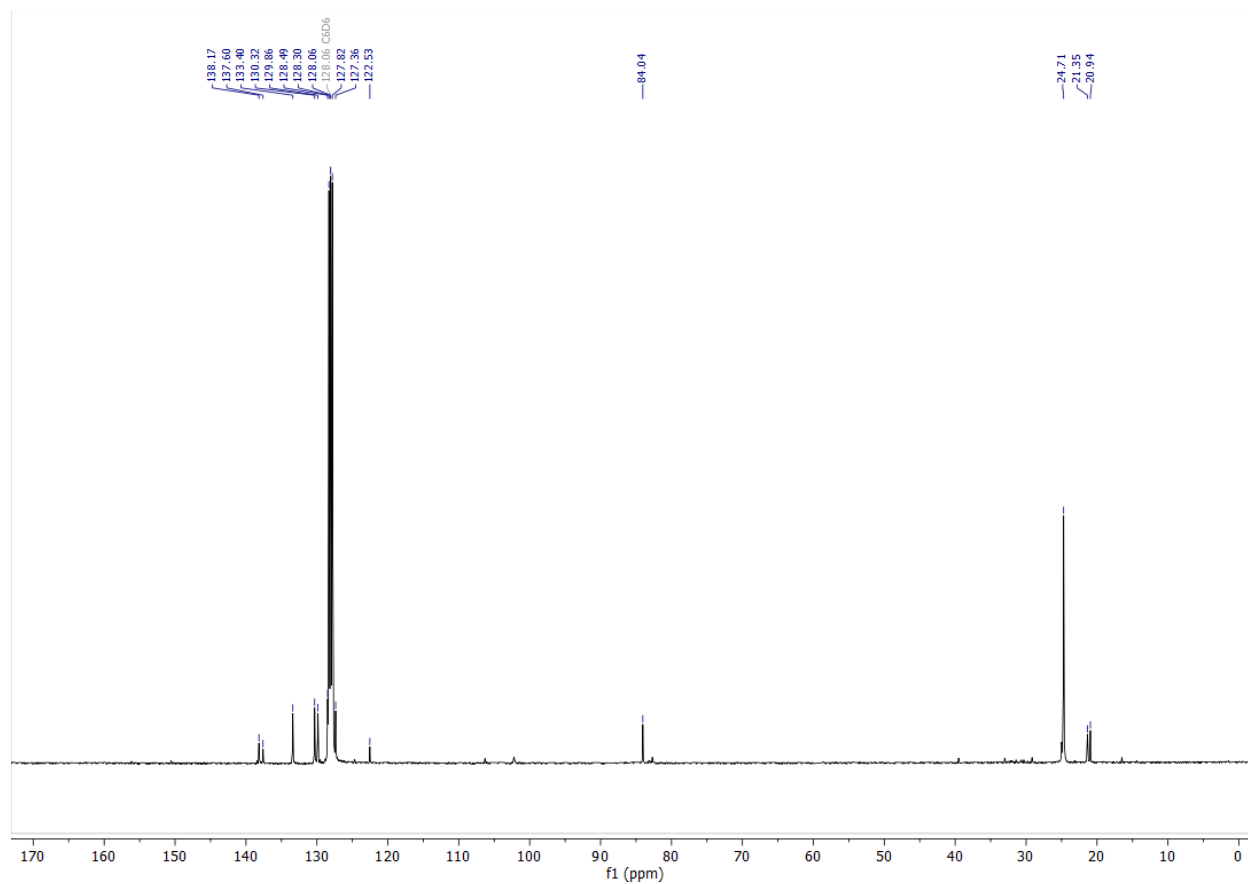

**Figure S54:**  $^{13}\text{C}$  NMR ( $\text{C}_6\text{D}_6$ , 400MHz) of 2-((3-methylphenyl)ethynyl)-4,4,5,5-tetramethyl-1,3,2-dioxaborolane

Peaks at 21.35, 127.36 and 137.60 ppm correspond to internal standard (mesitylene).

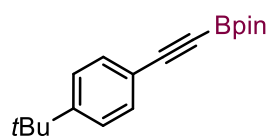

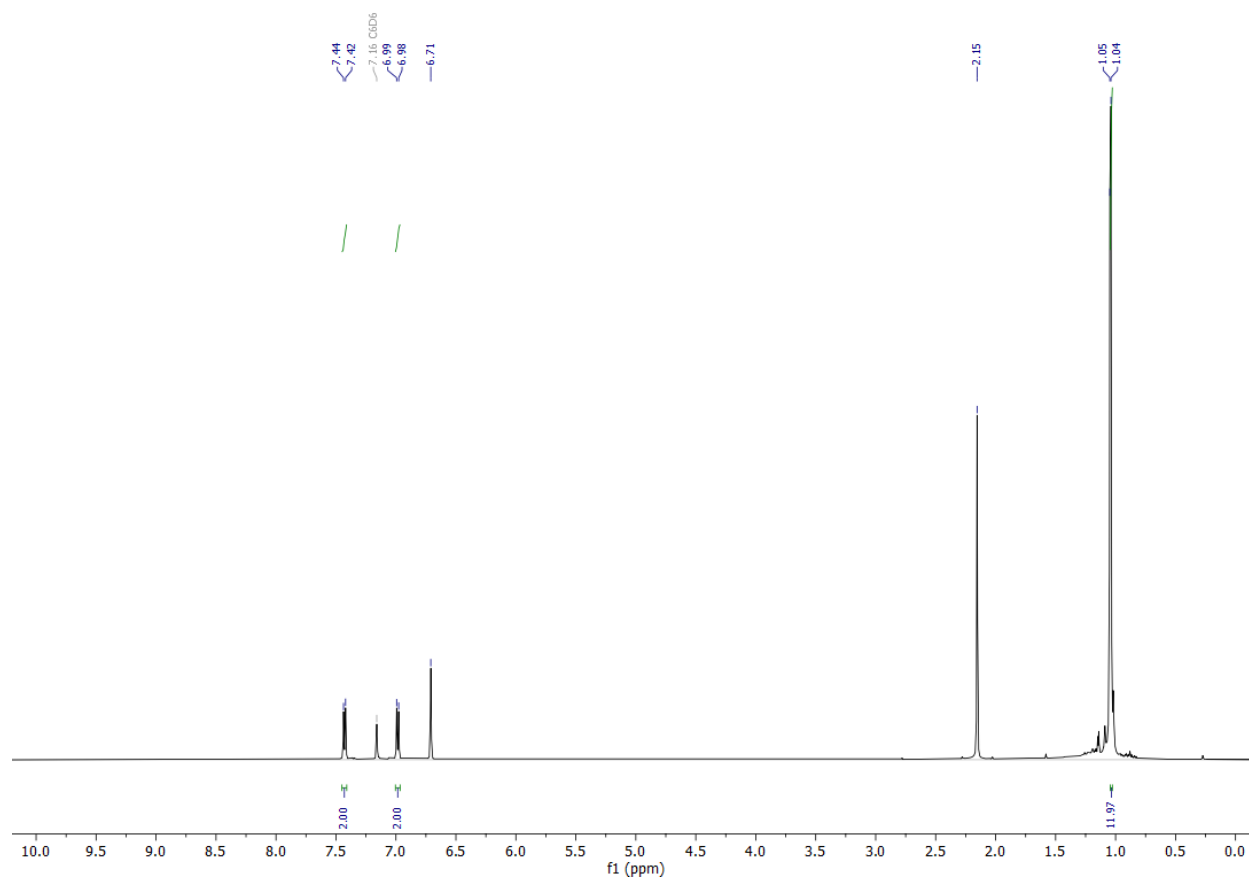

**Figure S55:**  $^1\text{H}$  NMR ( $\text{C}_6\text{D}_6$ , 500MHz) of 2-((4-*tert*-butylphenyl)ethynyl)-4,4,5,5-tetramethyl-1,3,2-dioxaborolane

Peaks at 2.15 and 6.71 ppm correspond to internal standard (mesitylene).

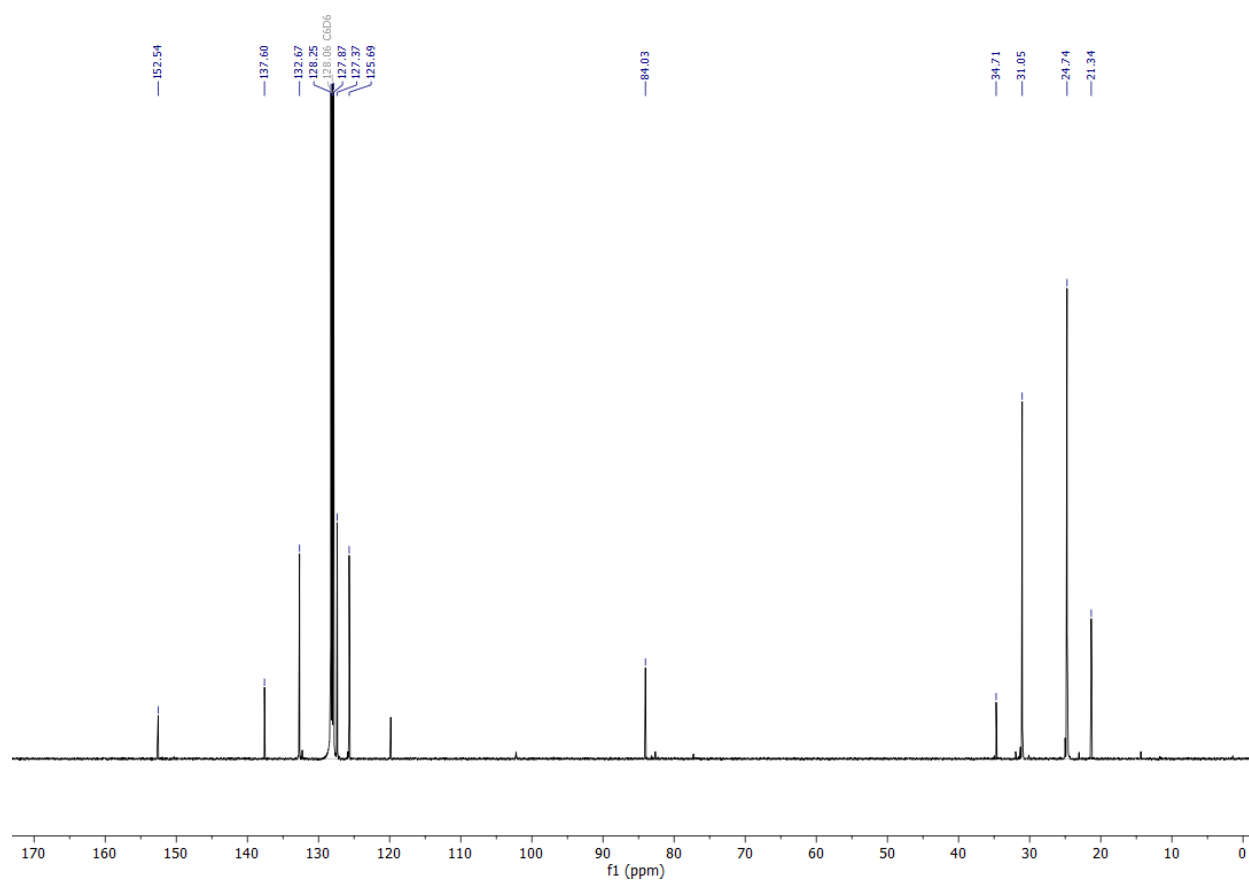

**Figure S56:**  $^{13}\text{C}$  NMR( $\text{C}_6\text{D}_6$ , 500MHz) of 2-((4-*tert*-butylphenyl)ethynyl)-4,4,5,5-tetramethyl-1,3,2-dioxaborolane

Peaks at 21.35, 127.36 and 137.60 ppm correspond to internal standard (mesitylene).

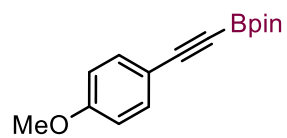

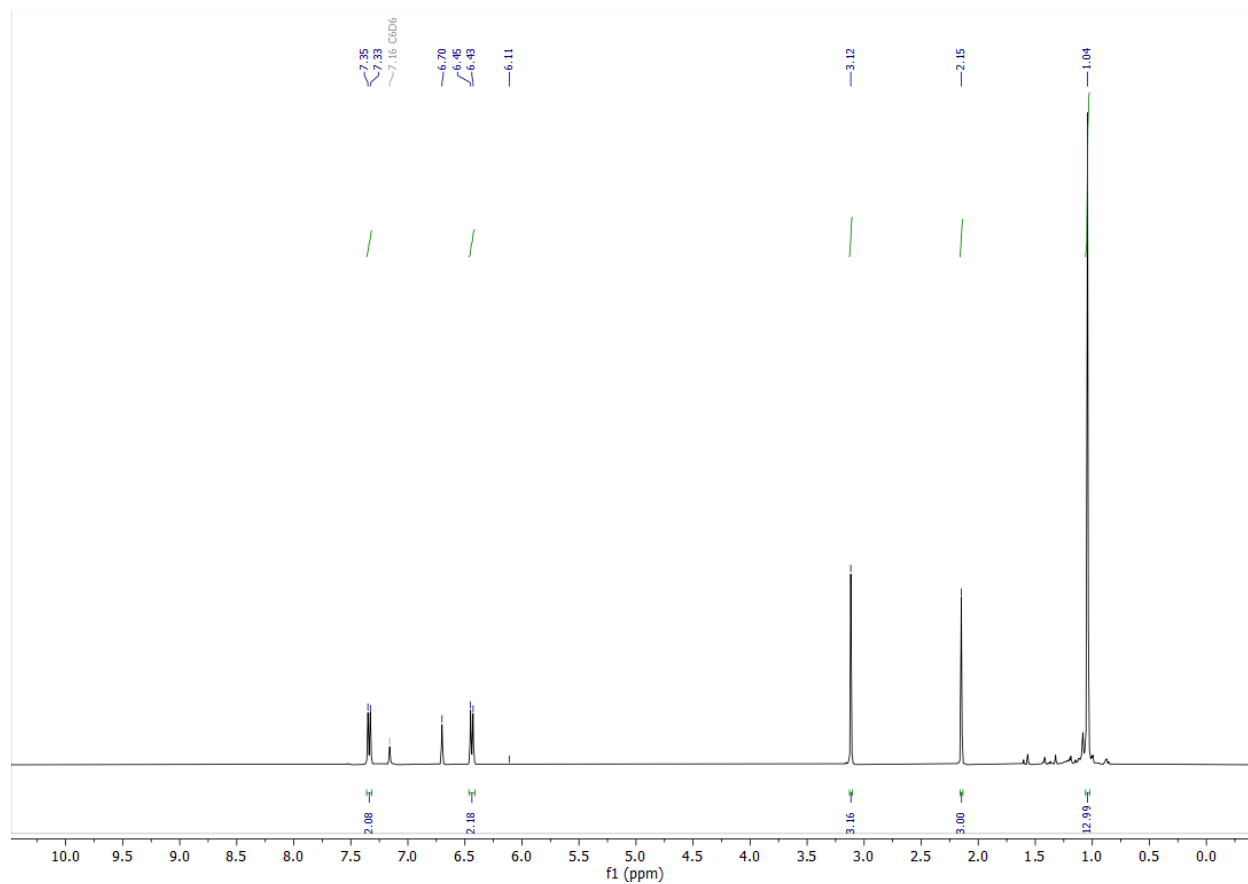

**Figure S57:**  $^1\text{H}$  NMR ( $\text{C}_6\text{D}_6$ , 400MHz) of 2-((4-methoxyphenyl)ethynyl)-4,4,5,5-tetramethyl-1,3,2-dioxaborolane

Peaks at 2.15 and 6.70 ppm correspond to internal standard (mesitylene).

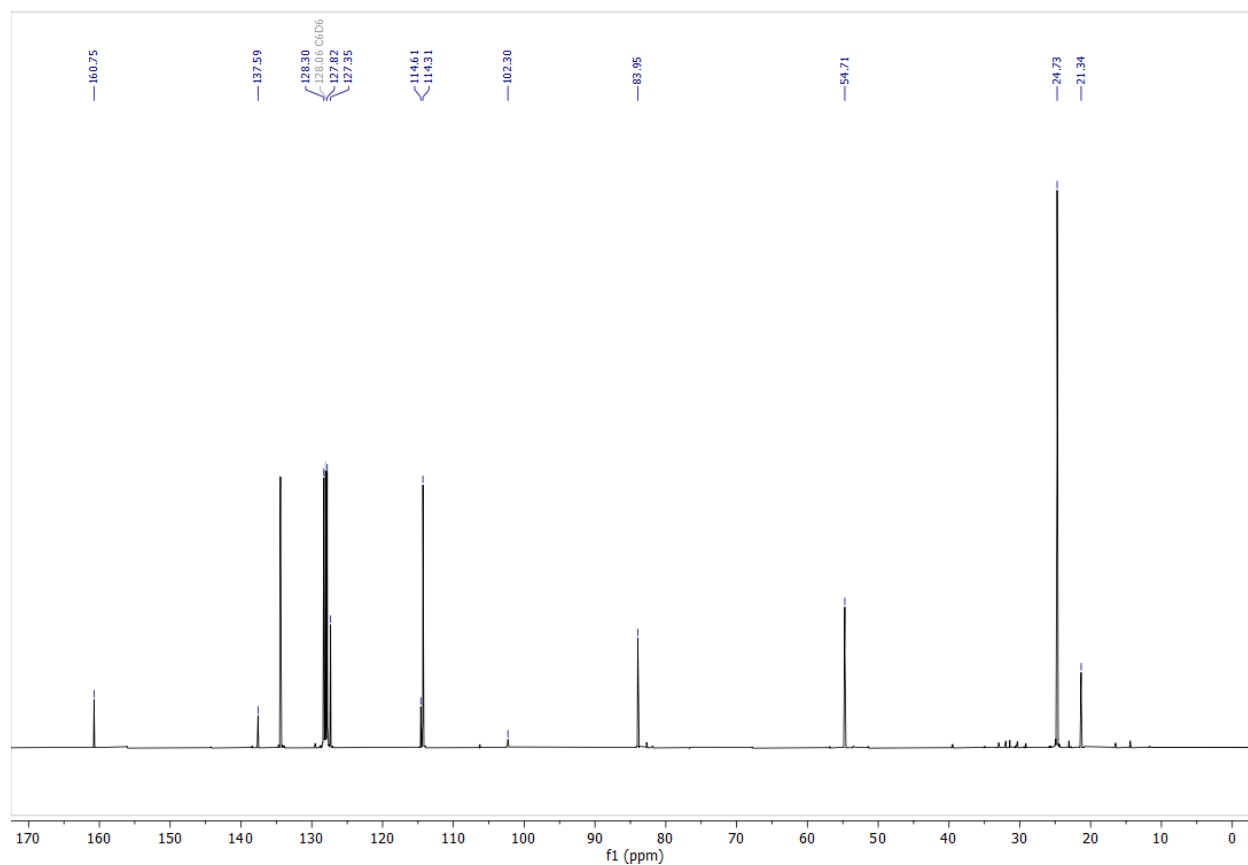

**Figure S58:**  $^{13}\text{C}$  NMR ( $\text{C}_6\text{D}_6$ , 400MHz) of 2-((4-methoxyphenyl)ethynyl)-4,4,5,5-tetramethyl-1,3,2-dioxaborolane

Peaks at 21.34, 127.35 and 137.59 ppm correspond to internal standard (mesitylene).

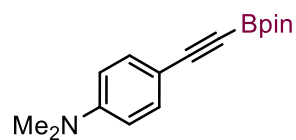

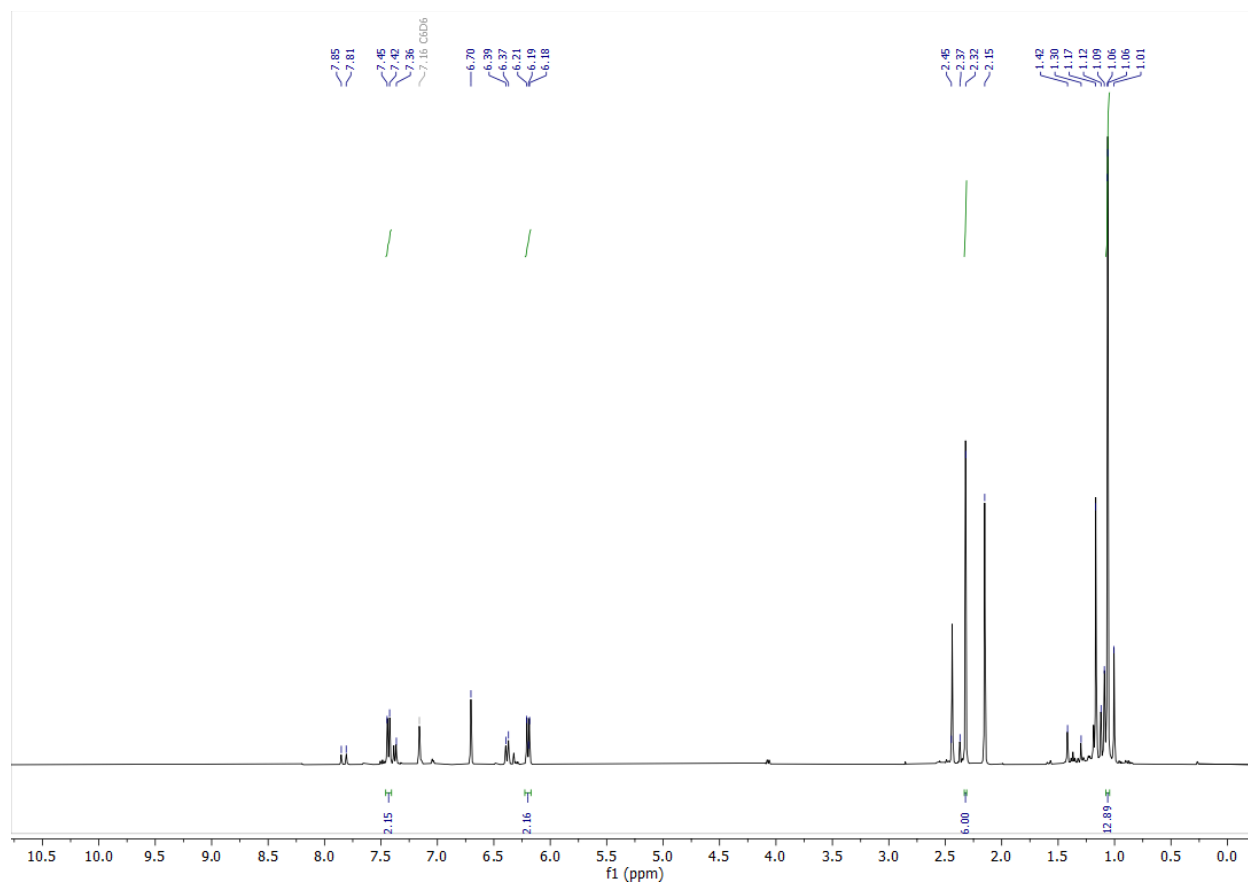

**Figure S59:**  $^1\text{H}$  NMR ( $\text{C}_6\text{D}_6$ , 400MHz) of 2-((*p*-N,N dimethylaniline)ethynyl)-4,4,5,5-tetramethyl-1,3,2-dioxaborolane

Peaks at 2.15 and 6.70 ppm correspond to internal standard (mesitylene).

Peaks at 1.09, 1.12, 1.17, 2.45, 6.37, 6.39, 7.36, 7.81 and 7.85 correspond to unidentified impurities.

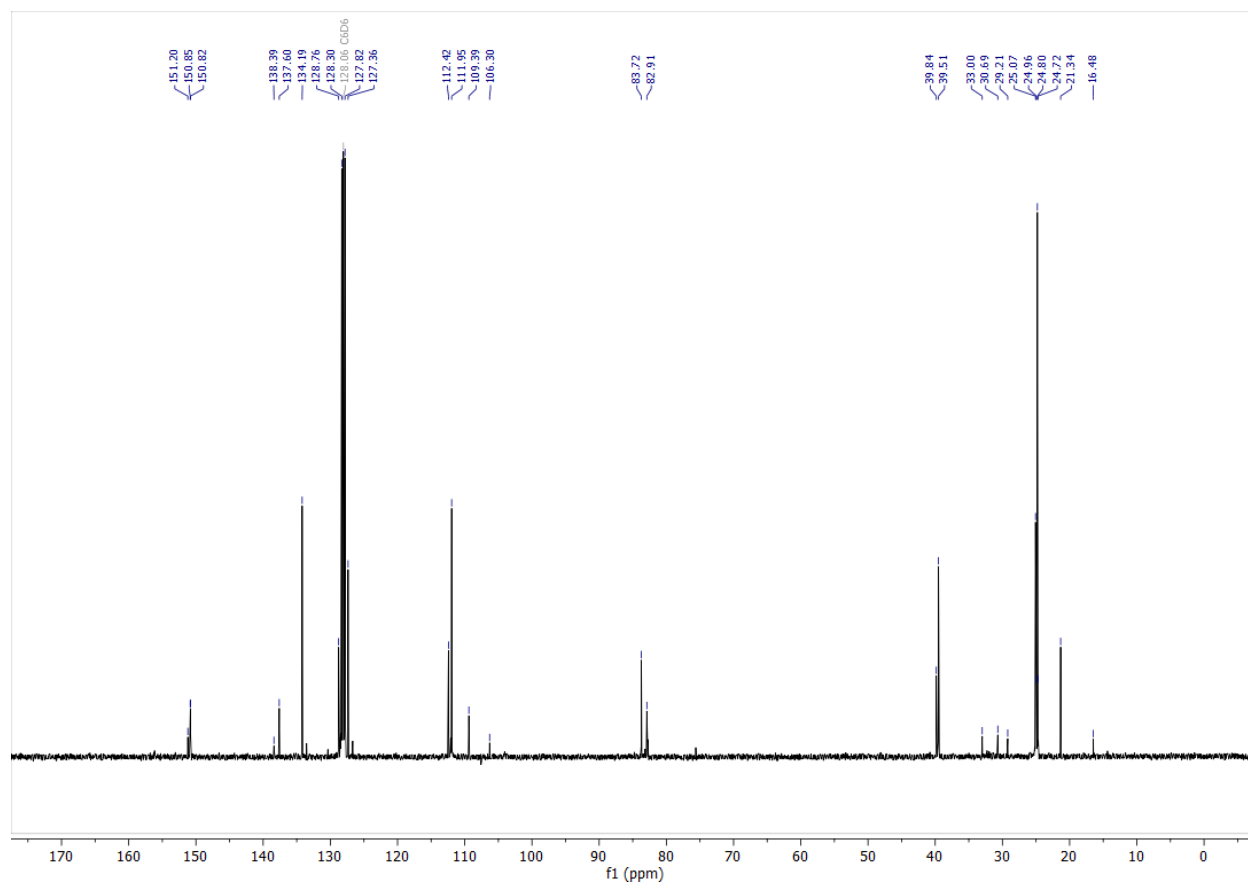

**Figure S60:**  $^{13}\text{C}$  NMR ( $\text{C}_6\text{D}_6$ , 400MHz) of 2-((*p*-N,N dimethylaniline)ethynyl)-4,4,5,5-tetramethyl-1,3,2-dioxaborolane

Peaks at 21.34, 127.36 and 137.60 ppm correspond to internal standard (mesitylene).

Peaks at 24.72, 24.96, 25.07, 39.84, 82.91, 112.42, 128.76, 137.60 and 151.20 correspond to unidentified impurities.

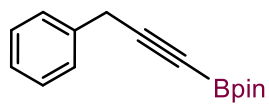

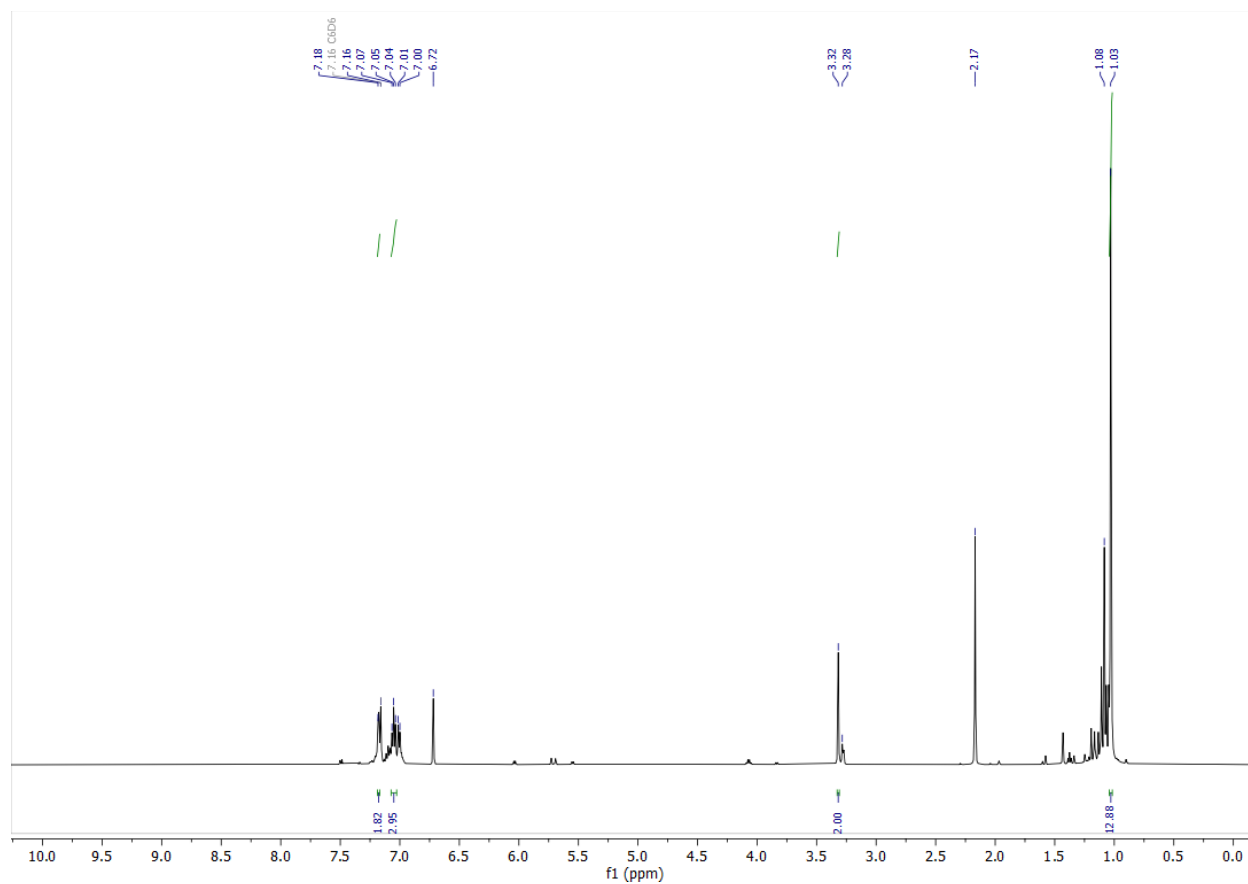

**Figure S61:**  $^1\text{H}$  NMR ( $\text{C}_6\text{D}_6$ , 500MHz) of 4,4,5,5-tetramethyl-2-((3-phenylprop-1-yn-1-yl))-1,3,2-dioxaborolane

Peaks at 2.15 and 6.70 ppm correspond to internal standard (mesitylene).

Peaks at 1.07, 1.08, 1.11, 3.28, 7.00 and 7.01 correspond to unidentified impurities.



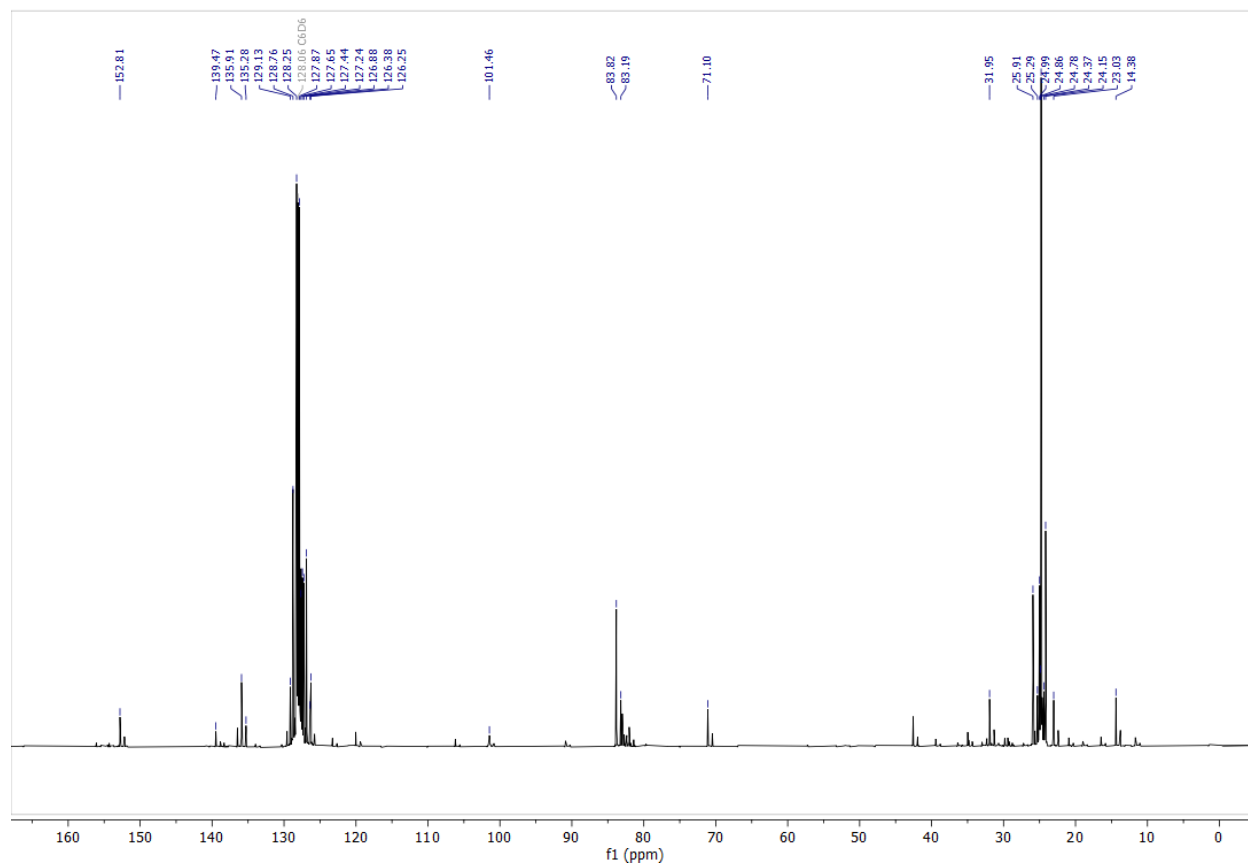

**Figure S62:**  $^{13}\text{C}$  NMR ( $\text{C}_6\text{D}_6$ , 500MHz) of 4,4,5,5-tetramethyl-2-((3-phenylprop-1-yn-1-yl))-1,3,2-dioxaborolane

Peaks at 14.38, 23.03, 24.15, 24.37, 24.78, 24.86, 24.99, 25.29, 31.95, 71.10, 83.19, 126.25, 126.38, 127.24, 127.44, 127.65, 129.13 and 152.81 correspond to unidentified impurities.

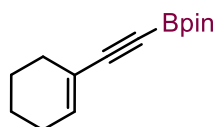

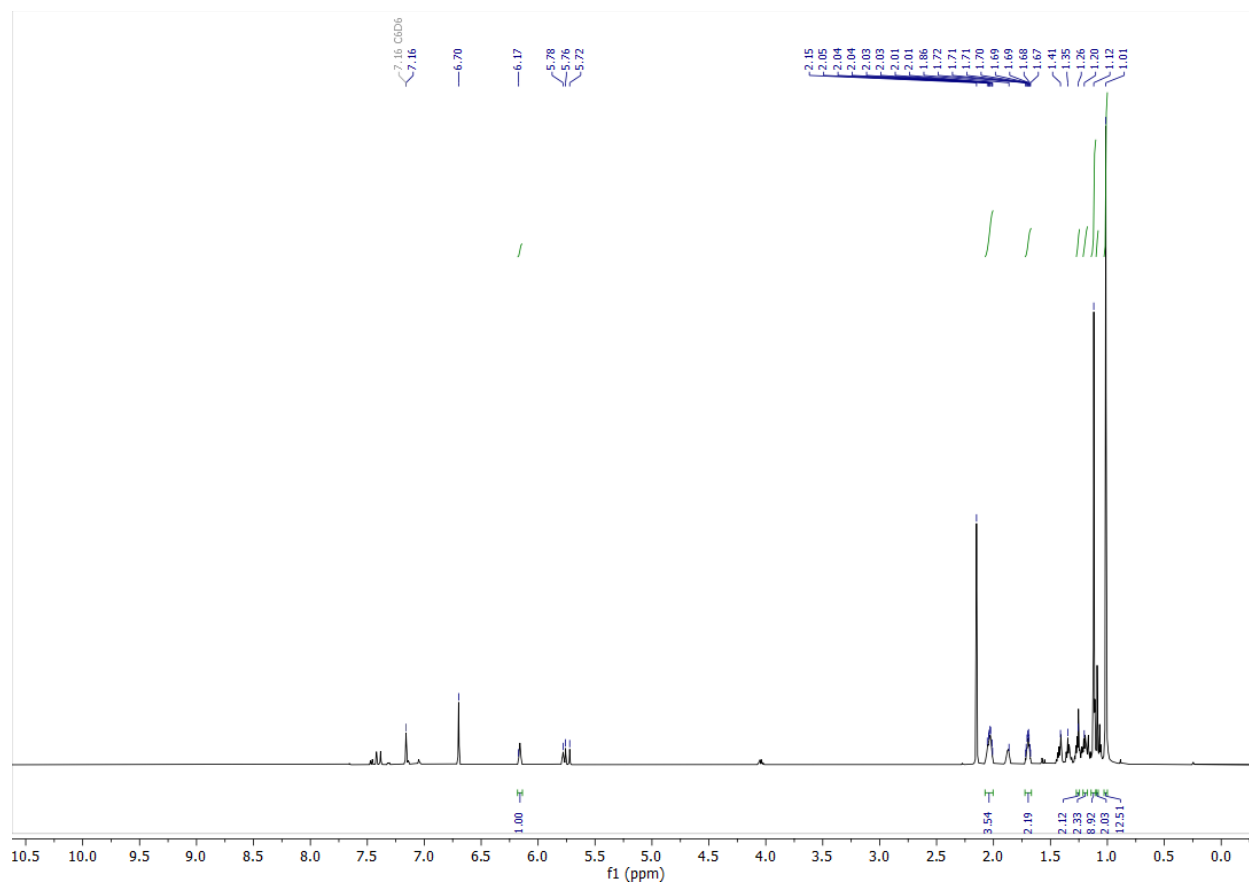

**Figure S63:**  $^1\text{H}$  NMR ( $\text{C}_6\text{D}_6$ , 500MHz) of 2-[2-(1-cyclohexenyl)ethynyl]-4,4,5,5-tetramethyl-1,3,2-dioxaborolane

Peaks at 2.15 and 6.70 ppm correspond to internal standard (mesitylene).

Peaks at 1.12, 1.35, 1.41, 5.72, 5.76 and 5.78 correspond to unidentified impurities.

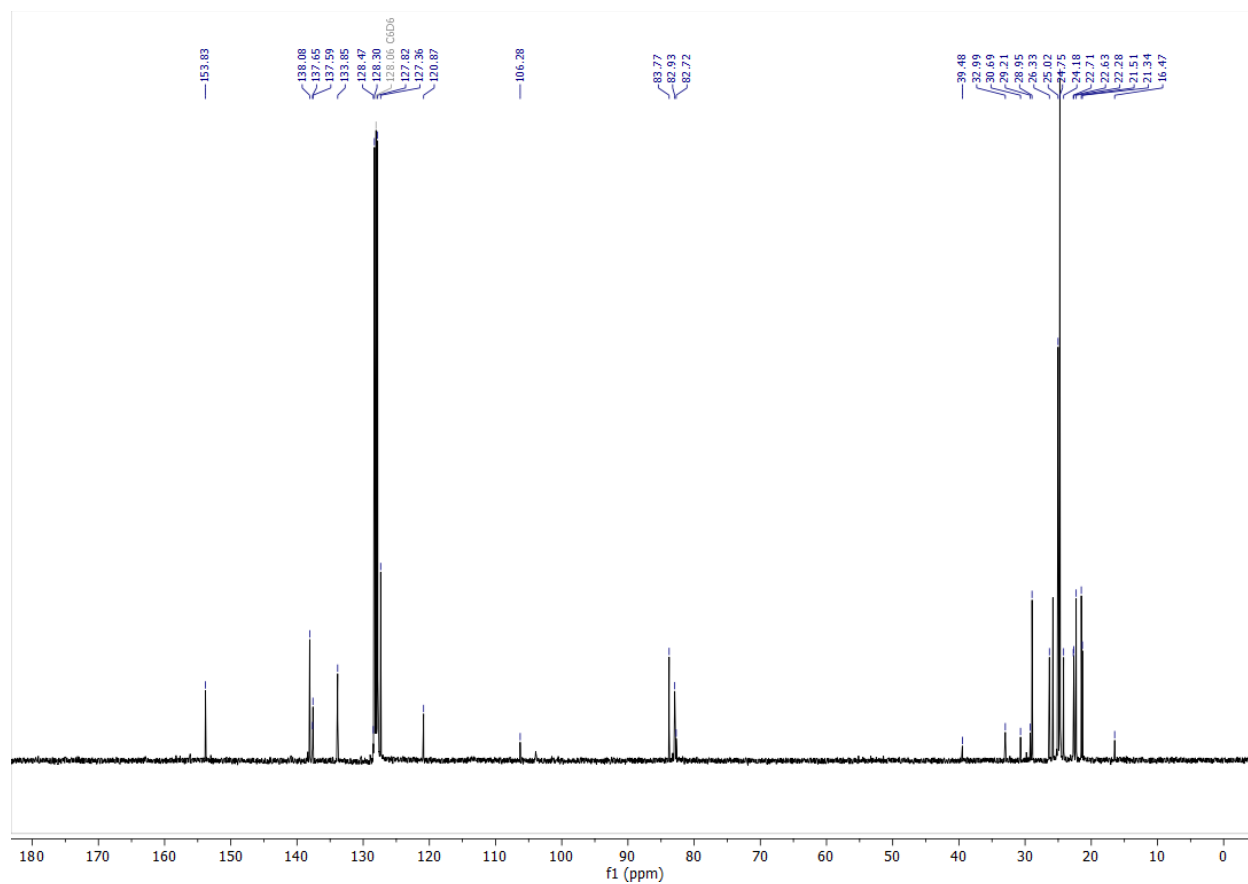

**Figure S64:**  $^{13}\text{C}$  NMR ( $\text{C}_6\text{D}_6$ , 400MHz) of 2-[2-(1-cyclohexenyl)ethynyl]-4,4,5,5-tetramethyl-1,3,2-dioxaborolane

Peaks at 21.34, 127.36 and 137.65 ppm correspond to internal standard (mesitylene).

Peaks at 22.63, 22.71, 24.18, 26.33, 29.21, 82.93, 133.85 and 153.83 correspond to unidentified impurities.

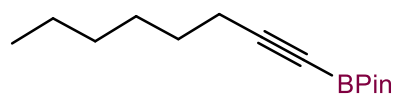

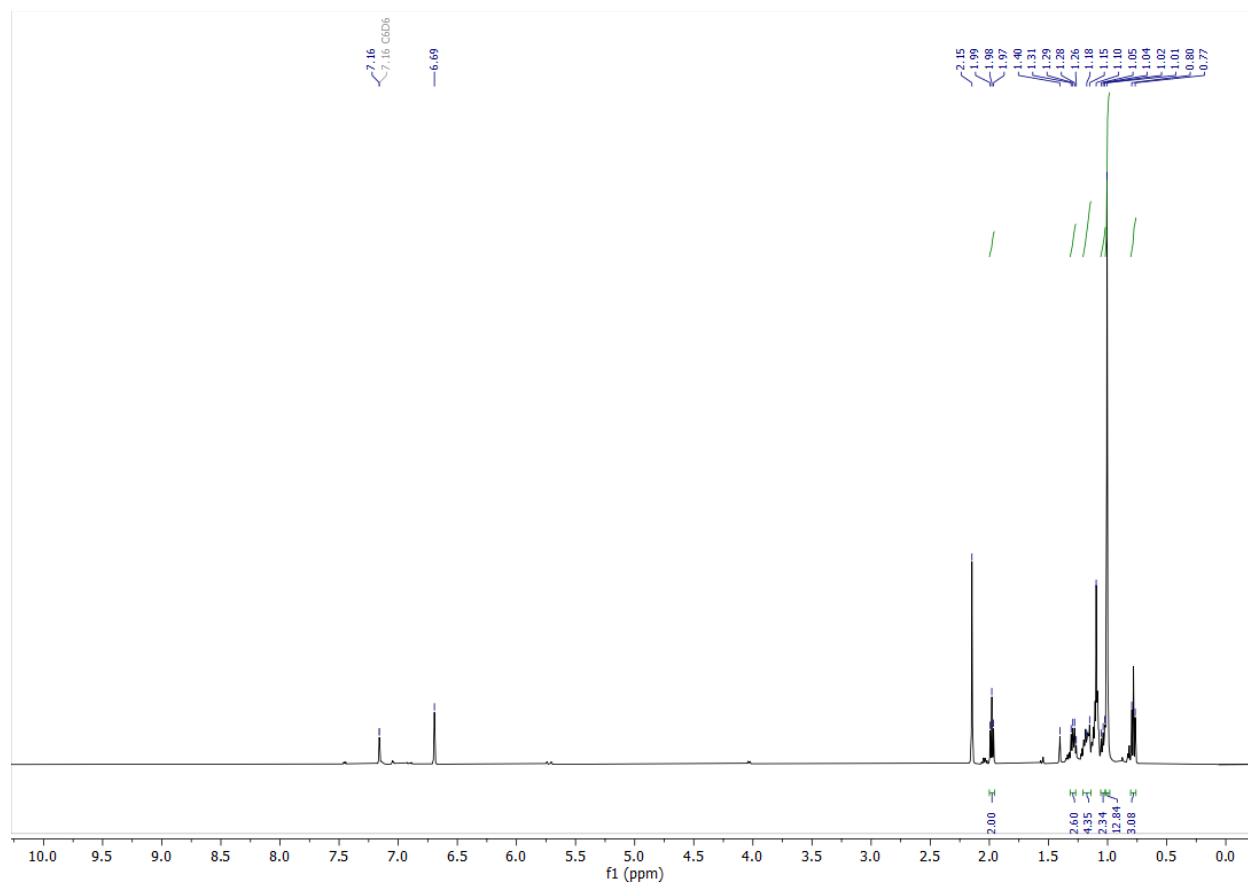

**Figure S65:**  $^1\text{H}$  NMR ( $\text{C}_6\text{D}_6$ , 500MHz) of 4,4,5,5-tetramethyl-2-(oct-1yn-1yl)-1,3,2-dioxaborolane  
 Peaks at 2.15 and 6.70 ppm correspond to internal standard (mesitylene).

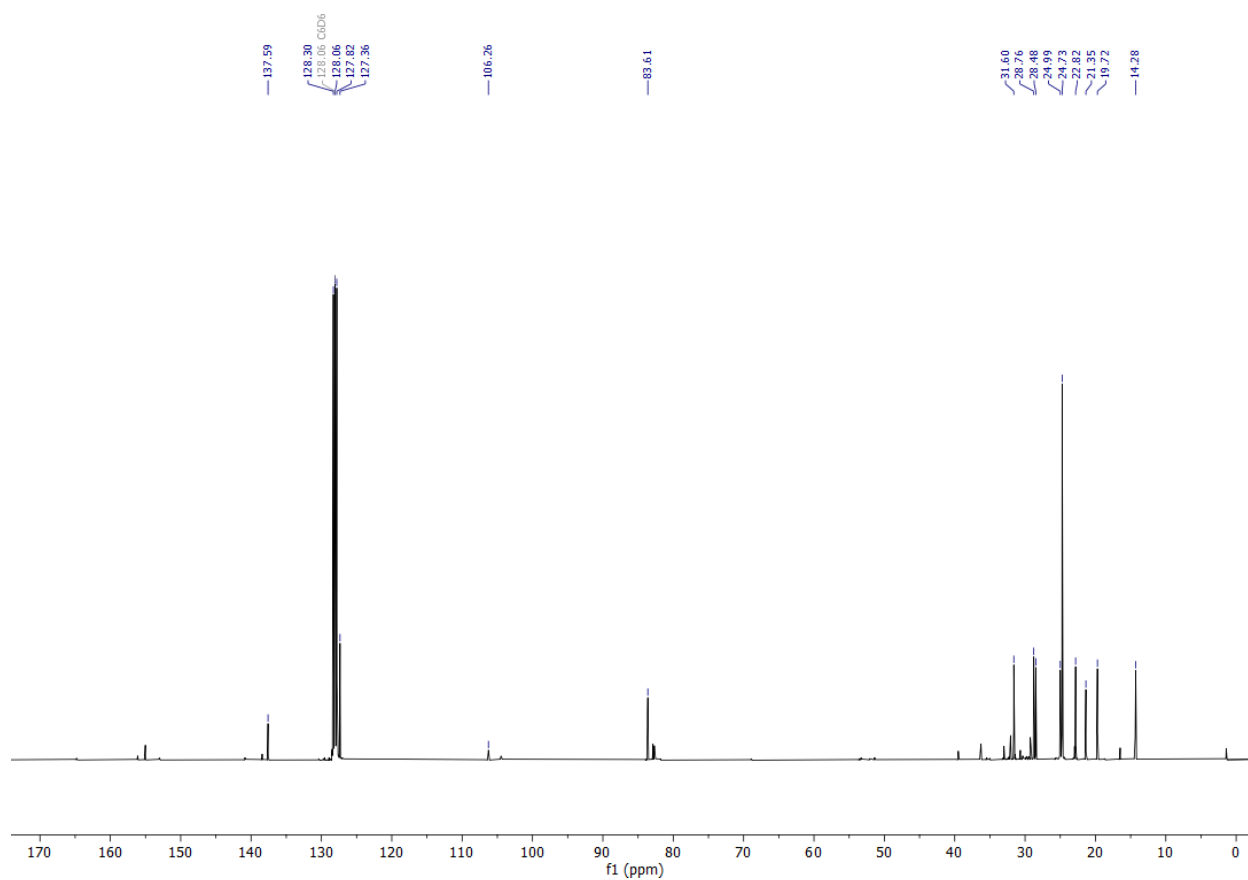

**Figure S66:**  $^{13}\text{C}$  NMR ( $\text{C}_6\text{D}_6$ , 400MHz) of 4,4,5,5-tetramethyl-2-(oct-1yn-1yl)-1,3,2-dioxaborolane

Peaks at 21.35, 127.36 and 137.59 ppm correspond to internal standard (mesitylene).

Peaks at 19.72, 24.99, 82.69 and 82.89 correspond to unidentified impurities.

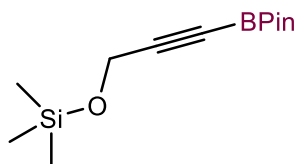

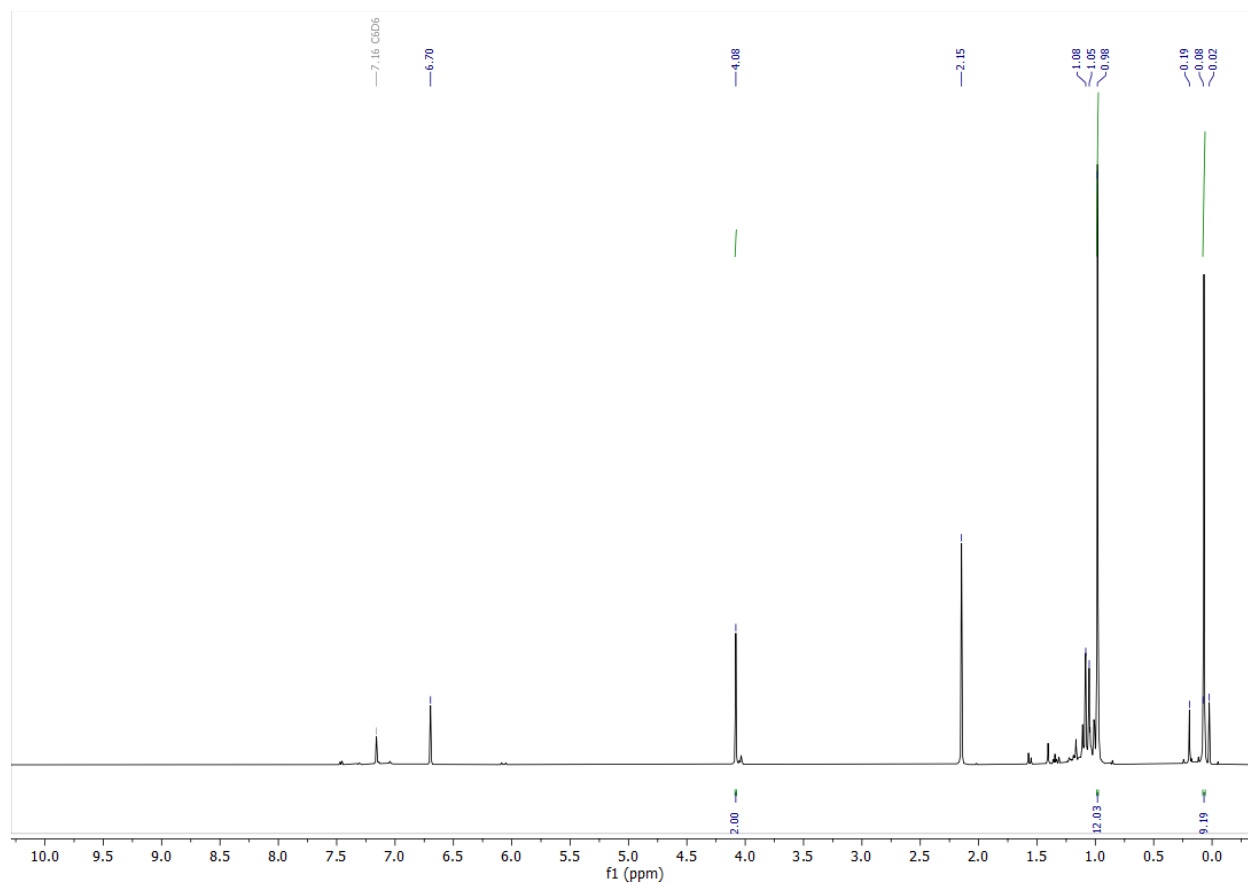

**Figure S67:**  $^1\text{H}$  NMR ( $\text{C}_6\text{D}_6$ , 500MHz) of 4,4,5,5-Tetramethyl-2-(propargyloxytrimethylsilylethynyl)-1,3,2-dioxaborolane

Peaks at 2.15 and 6.70 ppm correspond to internal standard (mesitylene).

Peaks at 0.02, 0.19, 1.05 and 1.08 correspond to unidentified impurities.

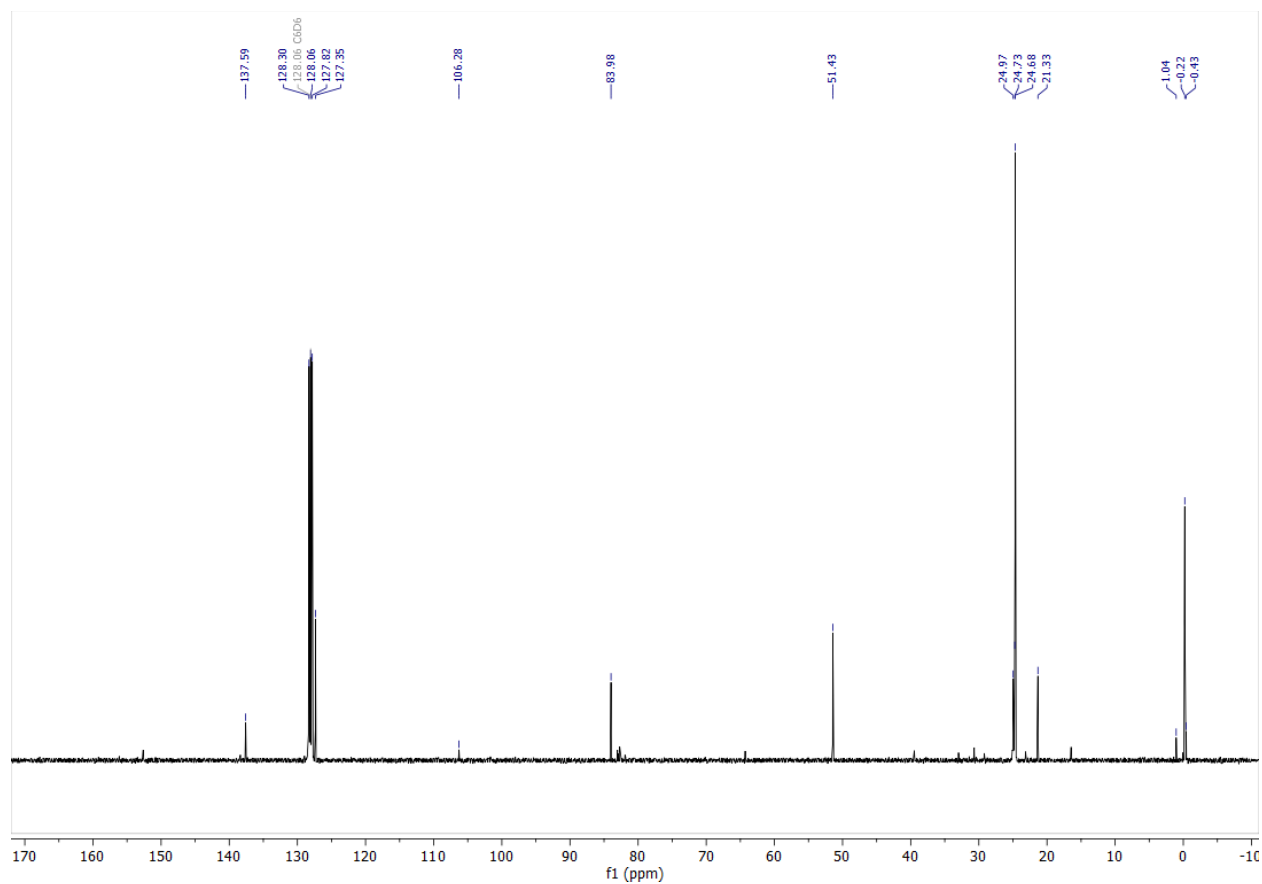

**Figure S68:**  $^{13}\text{C}$  NMR ( $\text{C}_6\text{D}_6$ , 400MHz) of 4,4,5,5-Tetramethyl-2-(propargyloxytrimethylsilylethynyl)-1,3,2-dioxaborolane

Peaks at 21.33, 127.35 and 137.59 ppm correspond to internal standard (mesitylene).

Peaks at 0.22, 1.04, 24.97 and 106.28 correspond to unidentified impurities.

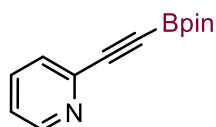

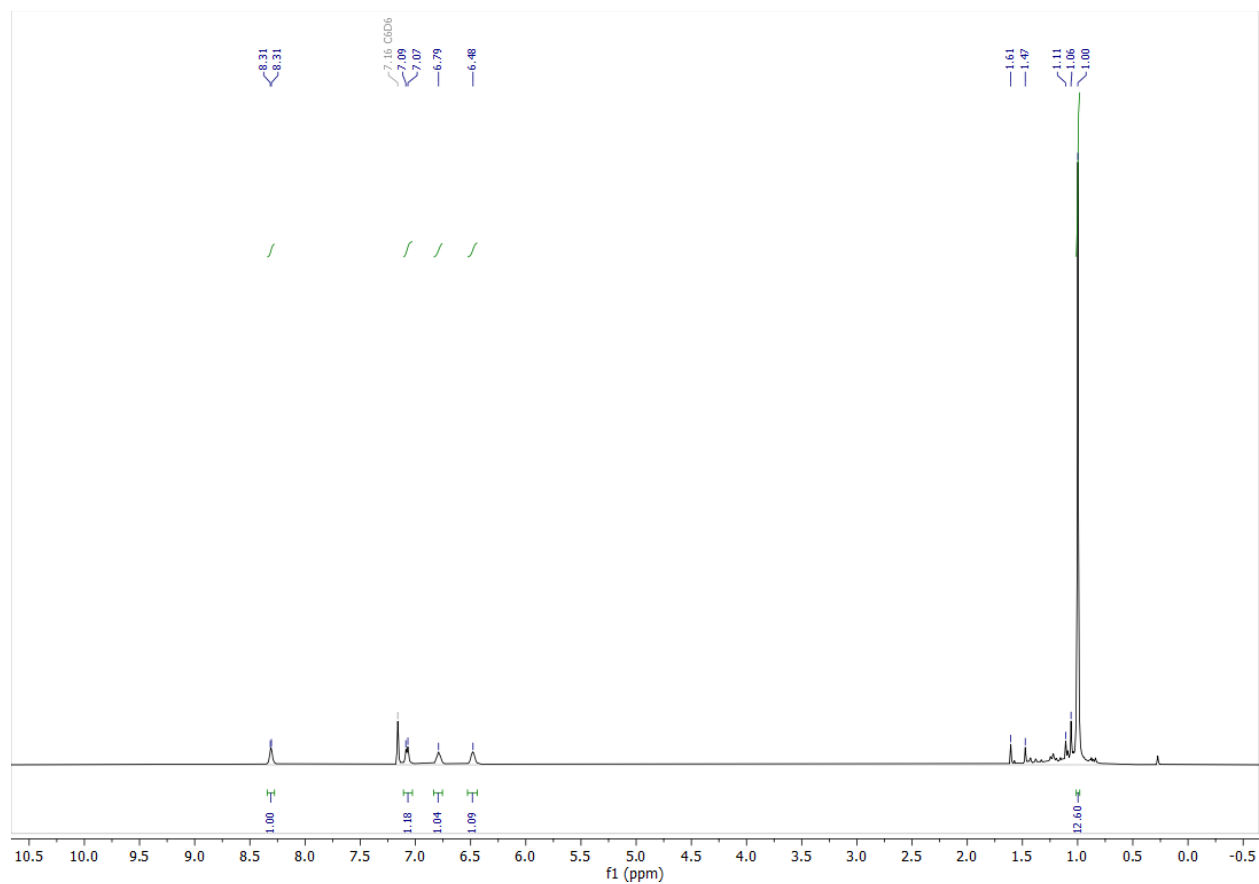

**Figure S69:**  $^1\text{H}$  NMR ( $\text{C}_6\text{D}_6$ , 400MHz) of 4,4,5,5-tetramethyl-2-(2-pyridylethynyl)-1,3,2-dioxaborolane

Peaks at 1.06, 1.11, 1.47 and 1.61 correspond to unidentified impurities.



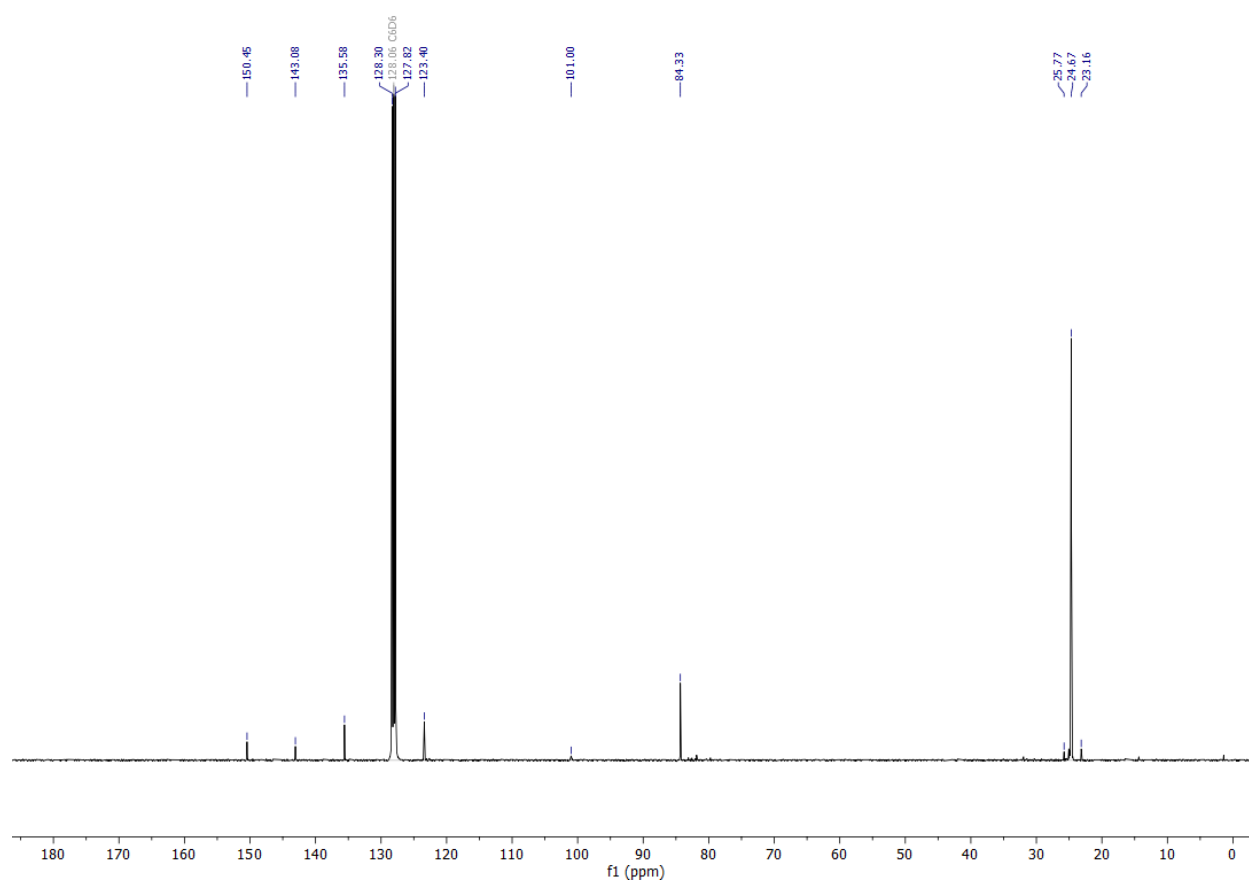

**Figure S70:** <sup>13</sup>C NMR (C<sub>6</sub>D<sub>6</sub>, 400MHz) of 4,4,5,5-tetramethyl-2-(2-pyridylethynyl)-1,3,2-dioxaborolane

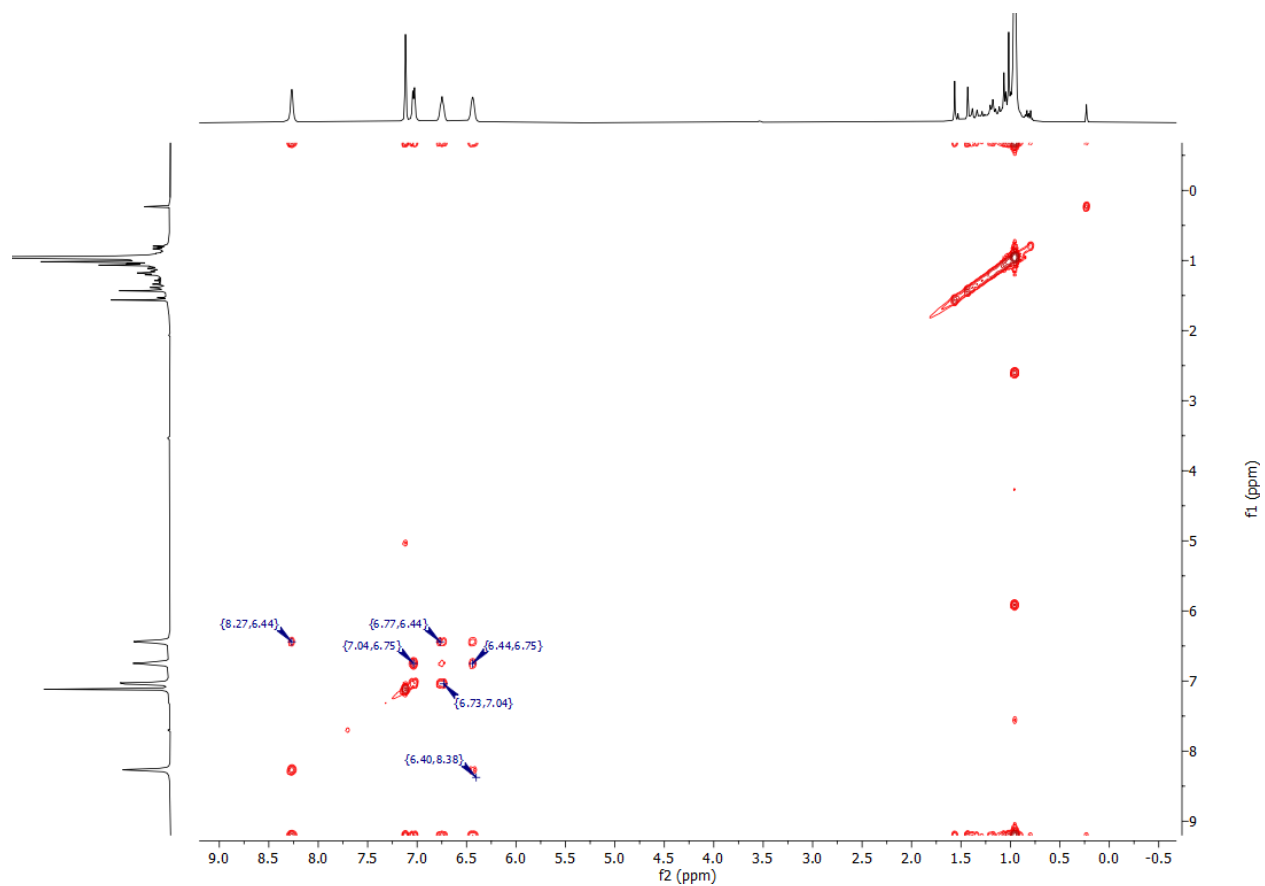

**Figure S71:** COSY NMR ( $C_6D_6$ , 400MHz) of 4,4,5,5-tetramethyl-2-(2-pyridylethynyl)-1,3,2-dioxaborolane

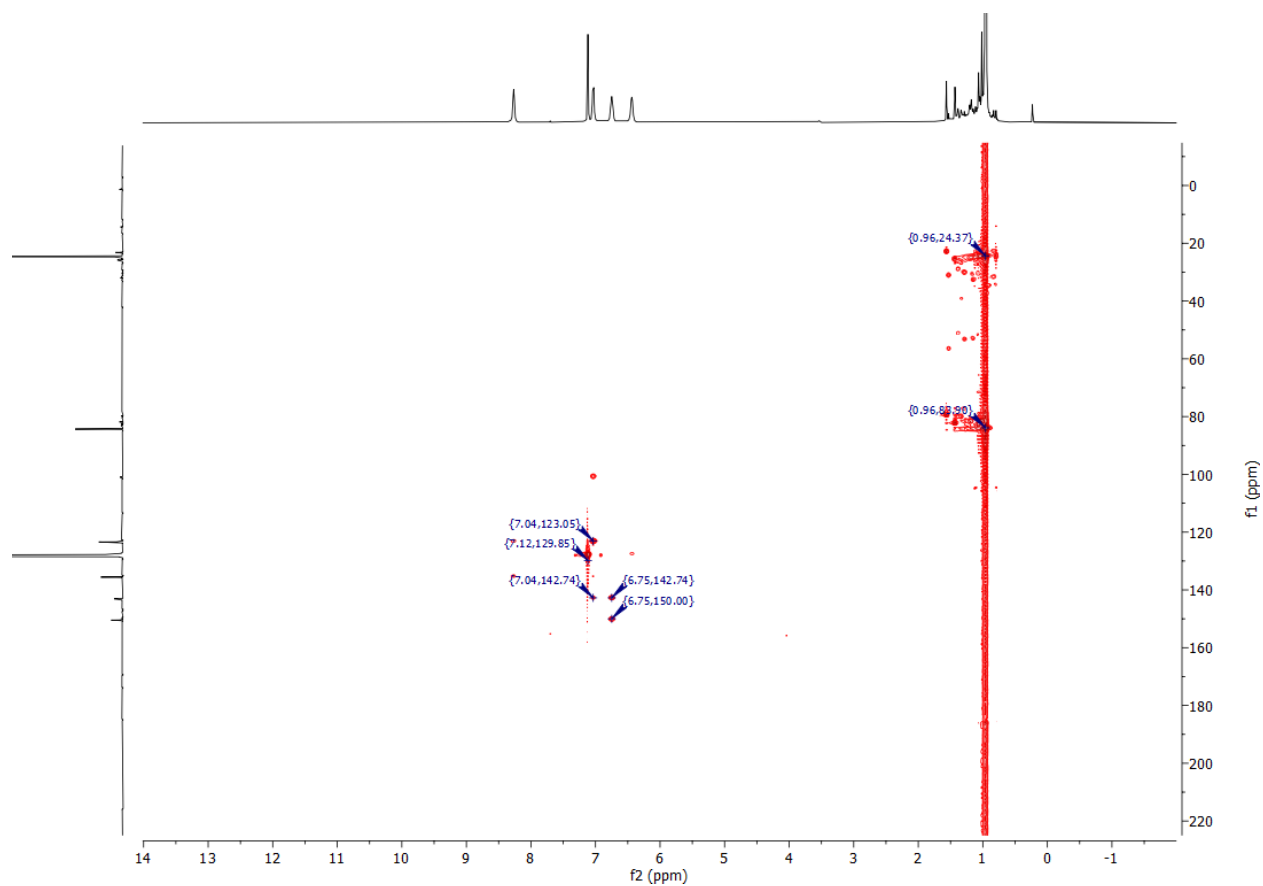

**Figure S72:** gHMBC NMR (C<sub>6</sub>D<sub>6</sub>, 400MHz) of 4,4,5,5-tetramethyl-2-(2-pyridylethynyl)-1,3,2-dioxaborolane

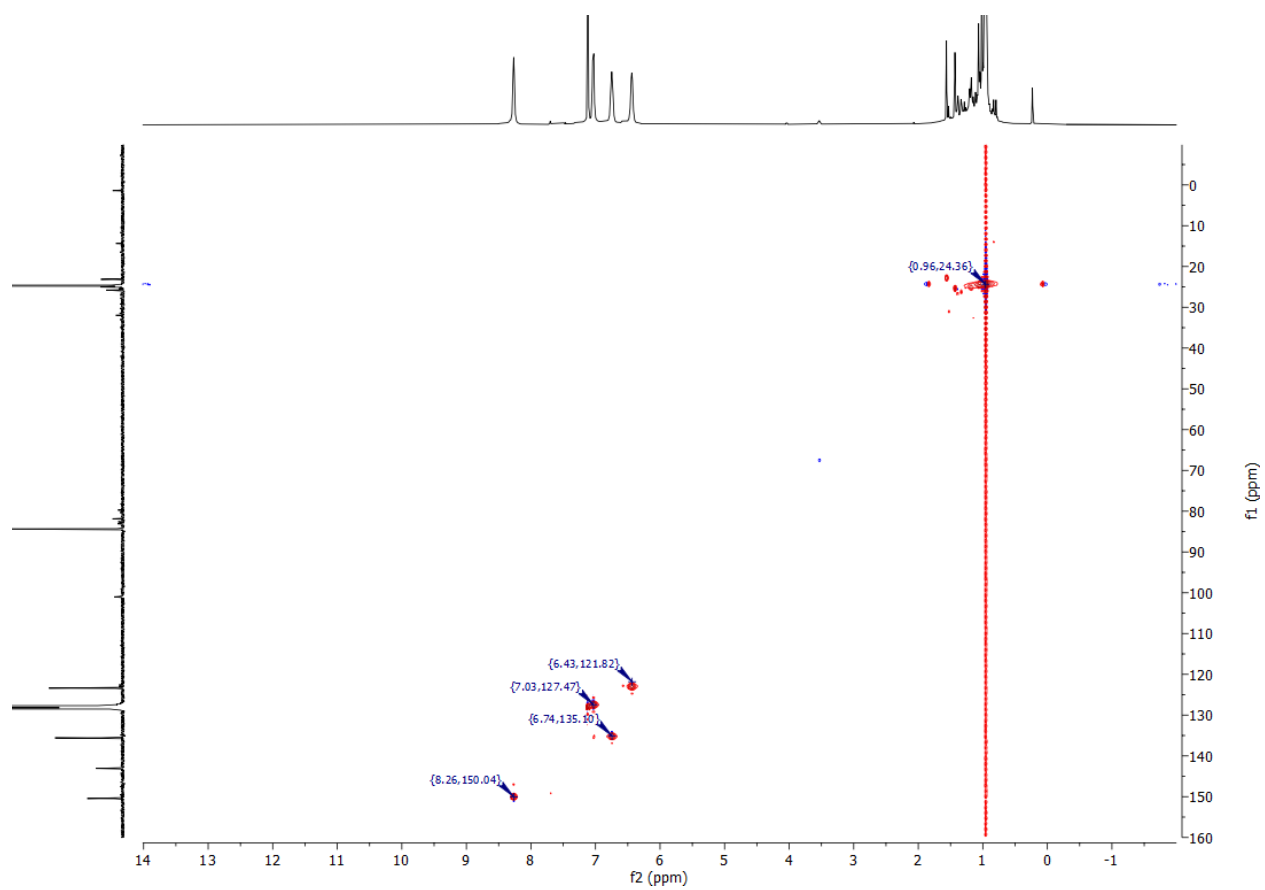

**Figure S73:** gHSQC NMR ( $\text{C}_6\text{D}_6$ , 400MHz) of 4,4,5,5-tetramethyl-2-(2-pyridylethynyl)-1,3,2-dioxaborolane

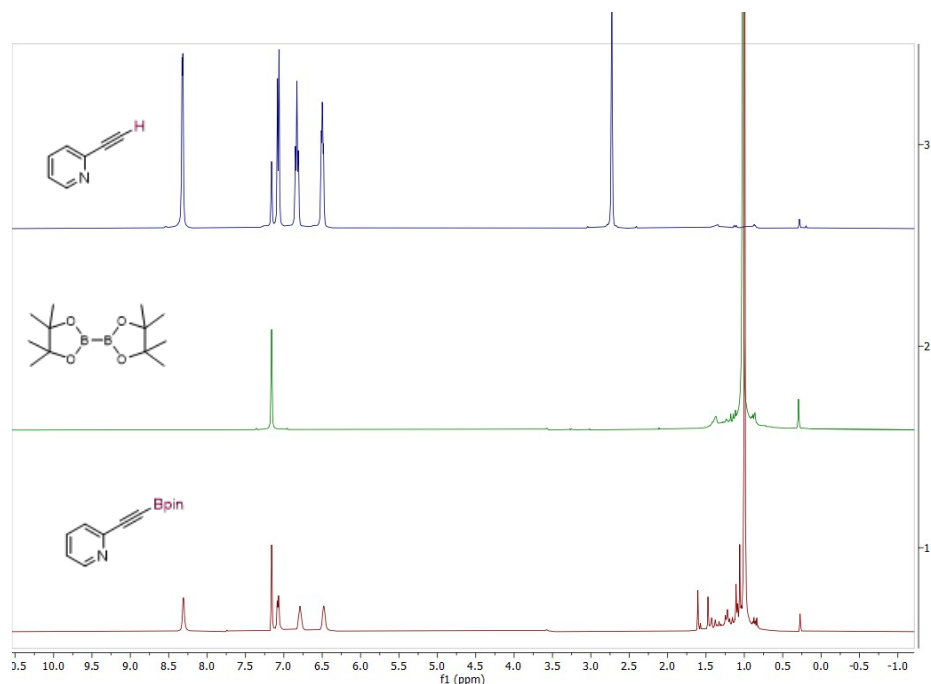

**Figure S74:** Stacked  $^1\text{H}$  NMR ( $\text{C}_6\text{D}_6$ , 400MHz) of 2- ethynyl pyridine (top), bis(pinacolato)diboron (center) and 4,4,5,5-tetramethyl-2-(2-pyridylethynyl)-1,3,2-dioxaborolane (bottom).

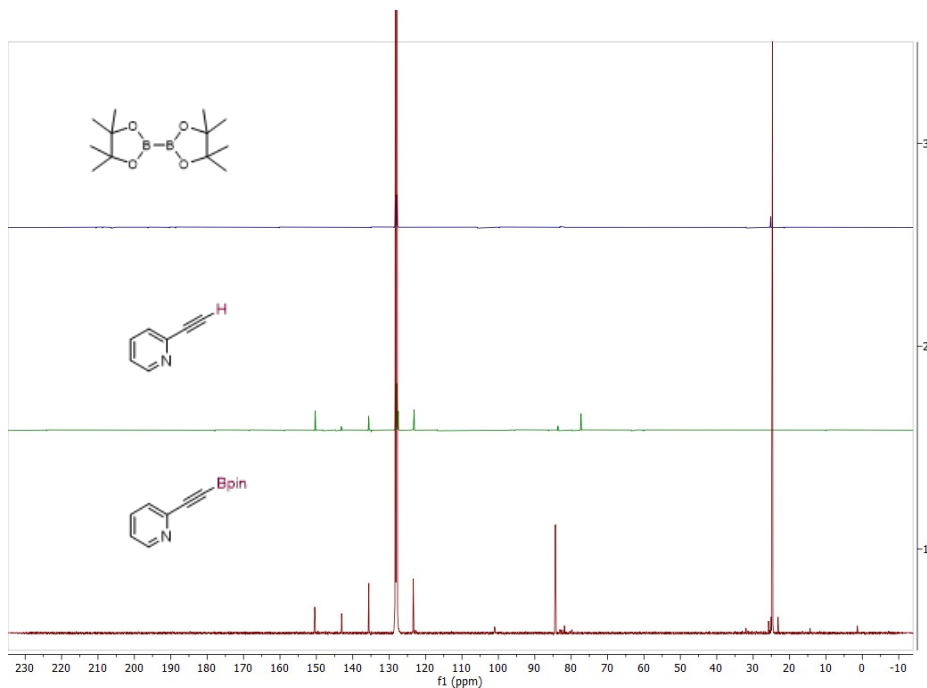

**Figure S75:** Stacked  $^{13}\text{C}$  NMR( $\text{C}_6\text{D}_6$ , 400MHz) of bis(pinacolato)diboron (top), 2-ethynyl pyridine (center) and 4,4,5,5-tetramethyl-2-(2-pyridylethynyl)-1,3,2-dioxaborolane (bottom).

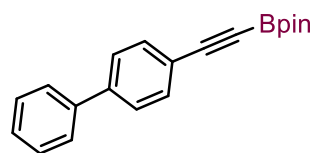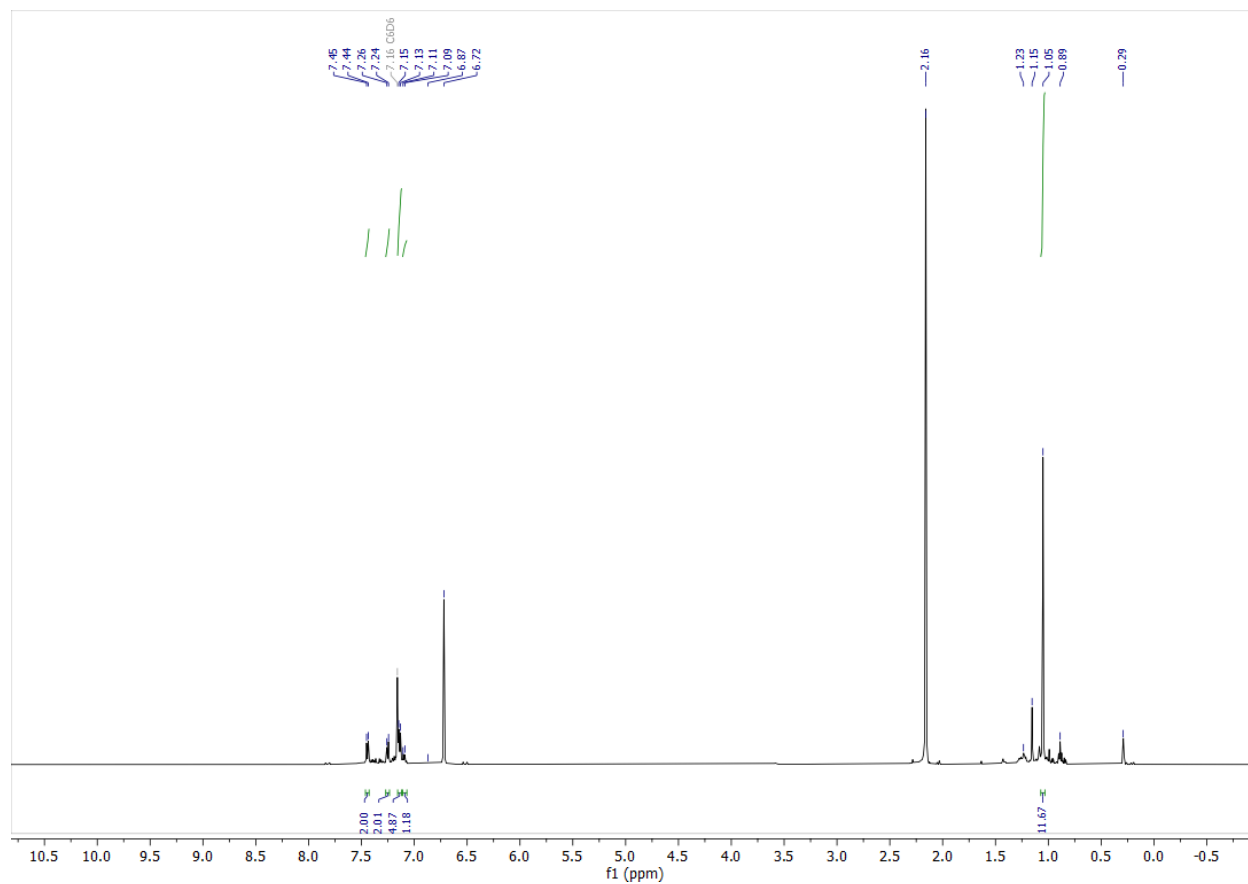

**Figure S76:**  $^1\text{H}$  NMR ( $\text{C}_6\text{D}_6$ , 500MHz) of 2-((1,1'-biphenyl)-4-ylethynyl)-4,4,5,5-Tetramethyl-1,3,2-dioxaborolane

Peaks at 2.16 and 6.72 ppm correspond to internal standard (mesitylene).

Peaks at 0.29, 0.89, 1.15 and 1.23 ppm correspond to unidentified impurities.

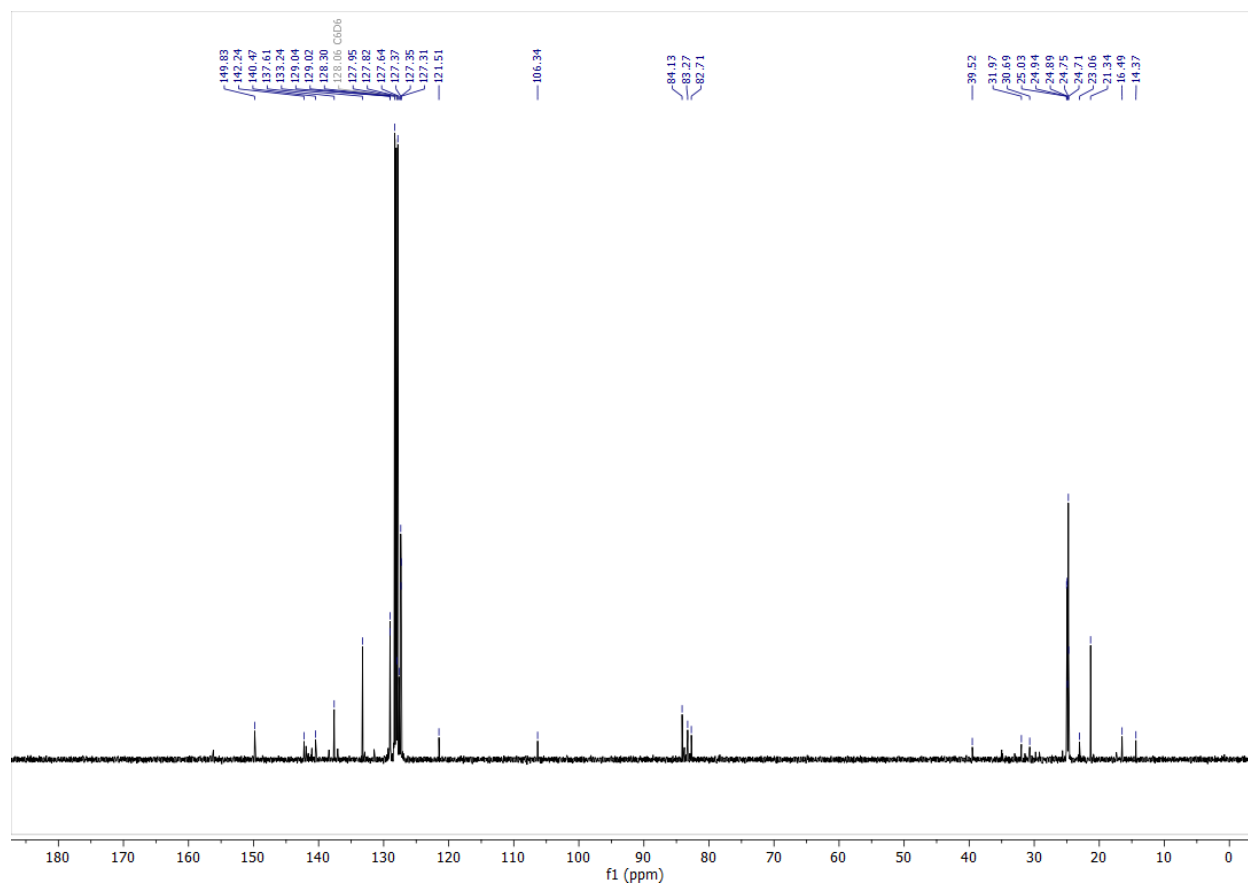

**Figure S77:**  $^{13}\text{C}$  NMR ( $\text{C}_6\text{D}_6$ , 400MHz) 2-((1,1'-biphenyl)-4-ylethynyl)-4,4,5,5-Tetramethyl-1,3,2-dioxaborolane

Peaks at 21.34, 127.31 and 137.61 ppm correspond to internal standard (mesitylene).

## 12. References

1. Pangborn, A. B.; Giardello, M. A.; Grubbs, R. H.; Rosen, R. K.; Timmers, F. J. Safe and Convenient Procedure for Solvent Purification. *Organometallics* **1996**, *15*, 1518–1520.
2. Gallego, D.; Inoue, S.; Blom, B.; Driess, M. Highly electron-rich pincer-type iron complexes bearing innocent bis(metallylene)pyridine ligands: syntheses, structures, and catalytic activity. *Organometallics* **2014**, *33*, 6885–6897.
3. El-Shazly, M. F.; El-Dissowky, A.; Salem, T.; Osman, M. Synthesis and electron spin resonance studies of copper(II) complexes with acid amide derivatives of 2-amino and 2,6-diaminopyridine. *Inorg. Chim. Acta* **1980**, *40*, 1–6.
4. Zhou, Y. -P.; Mo, Z.; Luecke, M. -P.; Driess, M. Stereoselective Transfer Semi Hydrogenation of Alkynes to E-Olefins with N-Heterocyclic Silylene-Manganese Catalysts. *Chem. Eur. J.* **2018**, *24*, 4780–4784.
5. Kalra, S.; Pividori, D.; Fehn, D.; Dai, C.; Dong, S.; Yao, S.; Zhu, J.; Meyer, K.; Driess, M. A bis(silylene)pyridine pincer ligand can stabilize mononuclear manganese(0) complexes: facile access to isolable analogues of the elusive  $d^7$ -Mn(CO)<sub>5</sub> radical. *Chem. Sci.* **2022**, *13*, 8634–8641.
6. Britton, L.; Skrodzki, M.; Nichol, G. S.; Dominey, A. P.; Pawluc, P.; Docherty, J. H.; Thomas, S. P. Manganese- Catalyzed C(sp<sup>2</sup>)-H Borylation of Furan and Thiophene Derivatives, *ACS Catal.*, **2021**, *11*, 6857–6864
7. Zhang, G.; Zeng, H.; Wu, J.; Yin, Z.; Zheng, S.; Fettingner, J. C. Highly Selective Hydroboration of Alkenes, Ketones and Aldehydes Catalyzed by a Well-Defined Manganese Complex. *Angew. Chem.* **2016**, *128*, 14581 –14584
8. Brzozowska, A.; Azofra, L. M.; Zubar, V.; Atodiresei, I.; Cavallo, L.; Rueping, M.; El-Sepelgy, O. Highly Chemo- and Stereoselective Transfer Semi-hydrogenation of Alkynes Catalyzed by a Stable, Well- Defined Manganese(II) Complex. *ACS Catal.* **2018**, *8*, 4103– 4109.
9. Iwadate, N.; Suginome, M. Synthesis of Masked Haloareneboronic Acids via Iridium-Catalyzed Aromatic C–H Borylation with 1,8-Naphthalenediaminatoborane (danBH). *J. Organomet. Chem.* **2009**, *694*, 1713–1717.
10. Willcox, D. R.; De Rosa, D. M.; Howley, J.; Levy, A.; Steven, A.; Nichol, G. S.; Morrison, C. A.; Cowley, M. J.; Thomas, S. P. Aluminium-Catalyzed C(sp)-H Borylation of Alkynes. *Angew. Chem. Int. Ed.* **2021**, *60*, 20672–20677.
11. Romero, E. A.; Jazzar, R., Bertrand G. (CAAC)CuX-Catalyzed Hydroboration of Terminal Alkynes with Pinacolborane Directed by the X-Ligand. *J. Organomet. Chem.* **2017**, *829*, 11–13.
12. Sahoo, R. K.; Rajput, S.; Patro, A., G.; Nembenna, S. Synthesis of low oxidation state zinc(I) complexes and their catalytic studies in the dehydroborylation of terminal alkynes. *Dalton Trans.*, **2022**, *51*, 16009–16016.
